# Supplementary material for: Facility-Based Delivery during the Ebola Virus Disease Epidemic in Rural Liberia: Analysis from a Cross-Sectional, Population-Based Household Survey
Source: PLoS Med. 2016 Aug 2;13(8):e1002096. doi: 10.1371/journal.pmed.1002096 (PMC4970816; doi:10.1371/journal.pmed.1002096)
Supplement: S2 Dataset — (XLSX) [file pmed.1002096.s006.xlsx]

## Sheet: Sheet1
hhid	strataid	clusterid	fbd_birth_history_2_46	survey_language	married_2_24	distancetoclinic_road	weight_sampling	fpc1	fpc2	mothers_age_at_birth	birth_in_village	ebola_fbd_june15	sens_ebola_fbd_aug6	sens_ebola_fbd_july15	sens_ebola_fbd_may29	rainy_birth	mothers_educ_three	birthorder_cat	mothers_age_birth_quartile_last4	sens_mothers_age_birth_quart	rivercess_wealth_iqr_scale	year_june	clinic_unsafe_belief	imputed_dob_ebola_fbd_june15	distance_road_under10	distance_road_10to21	distance_road_21andover	dob_after_24mar2011	dob_after_24mar2010	dob_after_24mar2012	dob_after_24mar2013	dob_before_11mar2015	imputed_dob_after_24mar2011
610	3	52	Born at facility	English	Yes	0.1	13.7235	0.151899	0.0771605	29	born in village	not during Ebola	not during Ebola	not during Ebola	not during Ebola	Dry season birth	none	1st			0.519663		not believe clinic trans	during Ebola	0.1	0	0	0	0	0	0	1	0
324	3	17	Born at facility	English	Yes	0.1	13.7235	0.151899	0.196262	27	NOT born in village	not during Ebola	not during Ebola	not during Ebola	not during Ebola	Dry season birth	none	1st			-0.233849		Believes clinic trans or unsure	during Ebola	0.1	0	0	0	0	0	0	1	0
433	1	8	Not born at facility	Bassa	Yes	8.4	6.24518	0.316456	0.35	33	born in village	not during Ebola	not during Ebola	not during Ebola	not during Ebola	Dry season birth	none	2nd-3rd	4	4	-0.860736	2012	Believes clinic trans or unsure	not during Ebola	8.4	0	0	1	1	1	0	1	1
949	2	39	Born at facility	Bassa	Yes	4.9	4.20117	0.390625	0.375	17	born in village	not during Ebola	not during Ebola	not during Ebola	not during Ebola	Dry season birth	Some primary	1st			-0.0981312		not believe clinic trans	during Ebola	4.9	0	0	0	0	0	0	1	0
1264	2	37	Not born at facility	Bassa	Yes	6.9	4.20117	0.390625	0.807692	32	born in village	not during Ebola	not during Ebola	not during Ebola	not during Ebola	Dry season birth	none	1st			-0.228371		not believe clinic trans	during Ebola	6.9	0	0	0	0	0	0	1	0
1014	2	23	Born at facility	Bassa	Yes	5.6	4.20117	0.390625	0.583333	18	born in village	not during Ebola	not during Ebola	not during Ebola	not during Ebola	Dry season birth	none	2nd-3rd		1	0.34796		Believes clinic trans or unsure	not during Ebola	5.6	0	0	0	1	0	0	1	0
1446	2	35	Born at facility	Bassa	Yes	11.4	4.20117	0.390625	0.84	32	born in village	not during Ebola	not during Ebola	not during Ebola	not during Ebola	Dry season birth	none	2nd-3rd			-0.0512347		not believe clinic trans	during Ebola	10	1.4	0	0	0	0	0	1	0
1411	1	44	Not born at facility	English	Yes	12.4	6.24518	0.316456	0.168	16	born in village	not during Ebola	not during Ebola	not during Ebola	not during Ebola	Dry season birth	none	1st			-0.364209		Believes clinic trans or unsure	during Ebola	10	2.4	0	0	0	0	0	1	0
777	1	69	Not born at facility	Bassa	Yes	15.6	6.24518	0.316456	0.590909	22	born in village	not during Ebola	not during Ebola	not during Ebola	not during Ebola	Dry season birth	none	4th or higher			-0.486372		not believe clinic trans	during Ebola	10	5.6	0	0	0	0	0	1	0
176	3	62	Born at facility	English	Yes	2	13.7235	0.151899	0.238636	.i	born in village	not during Ebola	not during Ebola	not during Ebola	not during Ebola	Dry season birth	Some primary	1st			0.494817		Believes clinic trans or unsure	during Ebola	2	0	0	0	0	0	0	1	0
856	2	24	Born at facility	Bassa	Yes	6.7	4.20117	0.390625	0.59375	13	born in village	not during Ebola	not during Ebola	not during Ebola	not during Ebola	Dry season birth	Some primary	2nd-3rd			-0.363669		not believe clinic trans	during Ebola	6.7	0	0	0	0	0	0	1	0
1457	2	32	Not born at facility	Bassa	Yes	10.5	4.20117	0.390625	0.588235	23	born in village	not during Ebola	not during Ebola	not during Ebola	not during Ebola	Dry season birth	Some primary	4th or higher			-0.609756		not believe clinic trans	during Ebola	10	0.5	0	0	0	0	0	1	0
295	3	57	Not born at facility	Bassa	Yes	4.4	13.7235	0.151899	0.538462	23	born in village	not during Ebola	not during Ebola	not during Ebola	not during Ebola	Dry season birth	none	4th or higher			-0.860736		Believes clinic trans or unsure	during Ebola	4.4	0	0	0	0	0	0	1	0
859	2	29	Not born at facility	Bassa	Yes	19.6	4.20117	0.390625	0.62069	28	born in village	not during Ebola	not during Ebola	not during Ebola	not during Ebola	Dry season birth	none	2nd-3rd			-0.252681		not believe clinic trans	during Ebola	10	9.6	0	0	0	0	0	1	0
26	2	27	Not born at facility	Bassa	Yes	5.2	4.20117	0.390625	0.75	27	born in village	not during Ebola	not during Ebola	not during Ebola	not during Ebola	Rainy season birth	none	4th or higher			-0.0786077		Believes clinic trans or unsure	during Ebola	5.2	0	0	0	0	0	0	1	0
890	3	46	Born at facility	Bassa	Yes	0.1	13.7235	0.151899	0.07	25	born in village	not during Ebola	not during Ebola	not during Ebola	not during Ebola	Dry season birth	Some primary	2nd-3rd	2	2	0.863175	2013	Believes clinic trans or unsure	not during Ebola	0.1	0	0	1	1	1	1	1	1
320	1	47	Not born at facility	Bassa	Yes	8	6.24518	0.316456	0.328125	14	born in village	not during Ebola	not during Ebola	not during Ebola	not during Ebola	Rainy season birth	none	2nd-3rd			-0.612094		Believes clinic trans or unsure	during Ebola	8	0	0	0	0	0	0	1	0
1258	2	19	Not born at facility	Bassa	Yes	6.2	4.20117	0.390625	0.326316	31	born in village	not during Ebola	not during Ebola	not during Ebola	not during Ebola	Rainy season birth	Some primary	2nd-3rd			-0.354093		Believes clinic trans or unsure	during Ebola	6.2	0	0	0	0	0	0	1	0
1289	2	21	Born at facility	English	Yes	6.2	4.20117	0.390625	0.326316	20	born in village	not during Ebola	not during Ebola	not during Ebola	not during Ebola	Dry season birth	Some primary	2nd-3rd			1.01536		Believes clinic trans or unsure	during Ebola	6.2	0	0	0	0	0	0	1	0
169	2	36	Not born at facility	Bassa	Yes	5.8	4.20117	0.390625	0.761905	22	born in village	not during Ebola	not during Ebola	not during Ebola	not during Ebola	Rainy season birth	none	2nd-3rd			-0.860736		Believes clinic trans or unsure	during Ebola	5.8	0	0	0	0	0	0	1	0
210	1	13	Born at facility	English	Yes	19.1	6.24518	0.316456	0.207237	22	born in village	not during Ebola	not during Ebola	not during Ebola	not during Ebola	Dry season birth	Some primary	2nd-3rd	2	2	0.822512		Believes clinic trans or unsure	not during Ebola	10	9.1	0	1	1	0	0	1	1
917	3	48	Born at facility	English	Yes	4.1	13.7235	0.151899	0.52381	36	NOT born in village	not during Ebola	not during Ebola	not during Ebola	not during Ebola	Rainy season birth	Some Secondary or more	4th or higher	4	4	1.87379	2011	not believe clinic trans	not during Ebola	4.1	0	0	1	1	0	0	1	1
506	3	46	Born at facility	Bassa	No	0.1	13.7235	0.151899	0.07	20	born in village	not during Ebola	not during Ebola	not during Ebola	not during Ebola	Dry season birth	Some primary	1st			-0.860736		Believes clinic trans or unsure	during Ebola	0.1	0	0	0	0	0	0	1	0
778	1	50	Not born at facility	Bassa	Yes	6.1	6.24518	0.316456	0.4375	33	born in village	not during Ebola	not during Ebola	not during Ebola	not during Ebola	Dry season birth	none	4th or higher			-0.0226402			during Ebola	6.1	0	0	0	0	0	0	1	0
319	1	66	Born at facility	English	Yes	15	6.24518	0.316456	0.653846	27	born in village	not during Ebola	not during Ebola	not during Ebola	not during Ebola	Dry season birth	Some primary	2nd-3rd			0.22637		not believe clinic trans	during Ebola	10	5	0	0	0	0	0	1	0
630	1	4	Not born at facility	English	Yes	5.6	6.24518	0.316456	0.525	26	born in village	not during Ebola	not during Ebola	not during Ebola	not during Ebola	Rainy season birth	Some primary	2nd-3rd	3	3	-0.309486	2011	Believes clinic trans or unsure	not during Ebola	5.6	0	0	1	1	0	0	1	1
866	2	54	Not born at facility	English	Yes	13.7	4.20117	0.390625	0.7	25	born in village	not during Ebola	not during Ebola	not during Ebola	not during Ebola	Rainy season birth	Some primary	2nd-3rd	2	2	-0.243966	2013	Believes clinic trans or unsure	not during Ebola	10	3.7	0	1	1	1	1	1	1
192	3	22	Born at facility	Bassa	Yes	0.1	13.7235	0.151899	0.084	18	NOT born in village	not during Ebola	not during Ebola	not during Ebola	not during Ebola	Dry season birth	Some Secondary or more	1st	1	1	0.519006	2012	not believe clinic trans	not during Ebola	0.1	0	0	1	1	1	0	1	1
447	2	60	Not born at facility	Bassa	Yes	5.6	4.20117	0.390625	0.28	19	born in village	not during Ebola	not during Ebola	not during Ebola	not during Ebola	Rainy season birth	none	1st			-0.584045		Believes clinic trans or unsure	during Ebola	5.6	0	0	0	0	0	0	1	0
278	1	69	Not born at facility	Bassa	Yes	15.6	6.24518	0.316456	0.590909	31	born in village	not during Ebola	not during Ebola	not during Ebola	not during Ebola	Dry season birth	none	4th or higher			-0.73		not believe clinic trans	during Ebola	10	5.6	0	0	0	0	0	1	0
17	3	25	Born at facility	Bassa	Yes	0.1	13.7235	0.151899	0.212121	44	born in village	not during Ebola	not during Ebola	not during Ebola	not during Ebola	Rainy season birth	none	4th or higher		4	-0.143595		not believe clinic trans	not during Ebola	0.1	0	0	0	1	0	0	1	0
1351	2	19	Not born at facility	English	Yes	6.2	4.20117	0.390625	0.326316	.i	born in village	not during Ebola	not during Ebola	not during Ebola	not during Ebola	Dry season birth	Some primary	1st			0.688202		not believe clinic trans	during Ebola	6.2	0	0	0	0	0	0	1	0
176	3	62	Born at facility	English	Yes	2	13.7235	0.151899	0.238636	.i	born in village	not during Ebola	not during Ebola	not during Ebola	not during Ebola	Dry season birth	Some primary	2nd-3rd			0.494817		Believes clinic trans or unsure	during Ebola	2	0	0	0	0	0	0	1	0
592	1	67	Not born at facility	Bassa	Yes	5.6	6.24518	0.316456	0.416667	32	born in village	not during Ebola	not during Ebola	not during Ebola	not during Ebola	Rainy season birth	none	4th or higher			-0.517453		Believes clinic trans or unsure	during Ebola	5.6	0	0	0	0	0	0	1	0
991	3	17	Not born at facility	English	Yes	0.1	13.7235	0.151899	0.196262	26	born in village	not during Ebola	not during Ebola	not during Ebola	not during Ebola	Rainy season birth	Some primary	2nd-3rd			-0.257912		Believes clinic trans or unsure	during Ebola	0.1	0	0	0	0	0	0	1	0
461	2	59	Born at facility	English	No	5.5	4.20117	0.390625	0.65625	19	born in village	not during Ebola	not during Ebola	not during Ebola	not during Ebola	Dry season birth	Some primary	2nd-3rd	1	1	-0.067	2011	not believe clinic trans	not during Ebola	5.5	0	0	1	1	0	0	1	1
829	1	18	Born at facility	English	No	9.6	6.24518	0.316456	1	33	NOT born in village	not during Ebola	not during Ebola	not during Ebola	not during Ebola	Dry season birth	Some primary	4th or higher	4	4	-0.463802	2011	Believes clinic trans or unsure	not during Ebola	9.6	0	0	1	1	0	0	1	1
1091	3	25	Born at facility	Bassa	No	0.1	13.7235	0.151899	0.212121	26	born in village	not during Ebola	not during Ebola	not during Ebola	not during Ebola	Rainy season birth	Some primary	2nd-3rd	3	3	-0.316447	2013	not believe clinic trans	not during Ebola	0.1	0	0	1	1	1	1	1	1
375	3	53	Not born at facility	English	Yes	0.1	13.7235	0.151899	0.0771605	32	born in village	not during Ebola	not during Ebola	not during Ebola	not during Ebola	Dry season birth	Some primary	2nd-3rd			3.35173		Believes clinic trans or unsure	during Ebola	0.1	0	0	0	0	0	0	1	0
1077	1	9	Born at facility	Bassa	Yes	5.2	6.24518	0.316456	0.913044	.i	born in village	not during Ebola	not during Ebola	not during Ebola	not during Ebola	Rainy season birth	none	1st			-0.73		Believes clinic trans or unsure	during Ebola	5.2	0	0	0	0	0	0	1	0
200	2	54	Born at facility	Bassa	Yes	5.4	4.20117	0.390625	0.7	29	NOT born in village	not during Ebola	not during Ebola	not during Ebola	not during Ebola	Dry season birth	none	2nd-3rd	3	3	0.0642113	2012	Believes clinic trans or unsure	not during Ebola	5.4	0	0	1	1	1	0	1	1
830	1	65	Born at facility	Bassa	Yes	5.2	6.24518	0.316456	0.782609	20	born in village	not during Ebola	not during Ebola	not during Ebola	not during Ebola	Rainy season birth	none	2nd-3rd			-0.860736		not believe clinic trans	during Ebola	5.2	0	0	0	0	0	0	1	0
609	3	48	Born at facility	Bassa	Yes	4.1	13.7235	0.151899	0.52381	32	born in village	not during Ebola	not during Ebola	not during Ebola	not during Ebola	Rainy season birth	none	4th or higher	4	4	-0.151663	2011	Believes clinic trans or unsure	not during Ebola	4.1	0	0	1	1	0	0	1	1
621	2	59	Born at facility	Bassa	Yes	5.5	4.20117	0.390625	0.65625	36	born in village	not during Ebola	not during Ebola	not during Ebola	not during Ebola	Dry season birth	none	1st			1.35241		Believes clinic trans or unsure	during Ebola	5.5	0	0	0	0	0	0	1	0
402	3	62	Born at facility	English	Yes	2	13.7235	0.151899	0.238636	12	born in village	not during Ebola	not during Ebola	not during Ebola	not during Ebola	Dry season birth	Some primary	1st			0.297063		not believe clinic trans	during Ebola	2	0	0	0	0	0	0	1	0
589	2	58	Born at facility	Bassa	Yes	19.8	4.20117	0.390625	0.28	.i	born in village	not during Ebola	not during Ebola	not during Ebola	not during Ebola	Dry season birth	none	2nd-3rd			0.490104		Believes clinic trans or unsure	during Ebola	10	9.8	0	0	0	0	0	1	0
777	1	69	Not born at facility	Bassa	Yes	15.6	6.24518	0.316456	0.590909	27	born in village	not during Ebola	not during Ebola	not during Ebola	not during Ebola	Rainy season birth	none	4th or higher	3	3	-0.486372	2012	not believe clinic trans	not during Ebola	10	5.6	0	1	1	1	0	1	1
582	2	64	Not born at facility	Bassa	Yes	7.2	4.20117	0.390625	0.333333	14	born in village	not during Ebola	not during Ebola	not during Ebola	not during Ebola	Dry season birth	none	1st			-0.574578		not believe clinic trans	during Ebola	7.2	0	0	0	0	0	0	1	0
800	3	48	Born at facility	Bassa	Yes	4.1	13.7235	0.151899	0.52381	30	born in village	not during Ebola	not during Ebola	not during Ebola	not during Ebola	Dry season birth	none	1st	3	3	-0.517453	2011	Believes clinic trans or unsure	not during Ebola	4.1	0	0	1	1	0	0	1	1
1390	3	33	Born at facility	Bassa	Yes	3.4	13.7235	0.151899	0.129231	14	born in village	not during Ebola	not during Ebola	not during Ebola	not during Ebola	Dry season birth	Some primary	2nd-3rd			-0.473918		Believes clinic trans or unsure	during Ebola	3.4	0	0	0	0	0	0	1	0
1323	2	37	Not born at facility	Bassa	Yes	6.9	4.20117	0.390625	0.807692	.i	born in village	not during Ebola	not during Ebola	not during Ebola	not during Ebola	Dry season birth	none	2nd-3rd			-0.860736		Believes clinic trans or unsure	during Ebola	6.9	0	0	0	0	0	0	1	0
1166	2	36	Not born at facility	Bassa	No	5.8	4.20117	0.390625	0.761905	35	born in village	not during Ebola	not during Ebola	not during Ebola	not during Ebola	Rainy season birth	none	1st	4	4	0.0243574	2012	Believes clinic trans or unsure	not during Ebola	5.8	0	0	1	1	1	0	1	1
828	1	47	Not born at facility	English	Yes	8	6.24518	0.316456	0.328125	20	born in village	not during Ebola	not during Ebola	not during Ebola	not during Ebola	Rainy season birth	Some primary	2nd-3rd			-0.169638		Believes clinic trans or unsure	during Ebola	8	0	0	0	0	0	0	1	0
506	3	46	Born at facility	Bassa	No	0.1	13.7235	0.151899	0.07	25	born in village	not during Ebola	not during Ebola	not during Ebola	not during Ebola	Rainy season birth	Some primary	2nd-3rd	2	2	-0.860736	2012	Believes clinic trans or unsure	not during Ebola	0.1	0	0	1	1	1	1	1	1
214	2	55	Not born at facility	Bassa	Yes	18.4	4.20117	0.390625	0.565217	18	born in village	not during Ebola	not during Ebola	not during Ebola	not during Ebola	Rainy season birth	Some primary	2nd-3rd			-0.486372		Believes clinic trans or unsure	during Ebola	10	8.4	0	0	0	0	0	1	0
690	2	54	Born at facility	English	Yes	5.4	4.20117	0.390625	0.7	23	born in village	not during Ebola	not during Ebola	not during Ebola	not during Ebola	Rainy season birth	Some primary	2nd-3rd			3.21082		Believes clinic trans or unsure	during Ebola	5.4	0	0	0	0	0	0	1	0
415	3	68	Born at facility	English	Yes	0.1	13.7235	0.151899	0.145833	38	born in village	not during Ebola	not during Ebola	not during Ebola	not during Ebola	Dry season birth	Some Secondary or more	4th or higher	4	4	2.35438	2013	Believes clinic trans or unsure	not during Ebola	0.1	0	0	1	1	1	1	1	1
226	3	46	Born at facility	Bassa	Yes	0.1	13.7235	0.151899	0.07	36	born in village	not during Ebola	not during Ebola	not during Ebola	not during Ebola	Dry season birth	none	1st			-0.0007364		not believe clinic trans	during Ebola	0.1	0	0	0	0	0	0	1	0
31	2	29	Not born at facility	Bassa	Yes	19.6	4.20117	0.390625	0.62069	24	born in village	not during Ebola	not during Ebola	not during Ebola	not during Ebola	Rainy season birth	none	2nd-3rd			-0.860736		not believe clinic trans	during Ebola	10	9.6	0	0	0	0	0	1	0
1237	3	34	Born at facility	Bassa	No	3.4	13.7235	0.151899	0.129231	31	born in village	not during Ebola	not during Ebola	not during Ebola	not during Ebola	Rainy season birth	none	2nd-3rd			0.196241		not believe clinic trans	during Ebola	3.4	0	0	0	0	0	0	1	0
1238	2	19	Born at facility	Bassa	Yes	6.2	4.20117	0.390625	0.326316	23	born in village	not during Ebola	not during Ebola	not during Ebola	not during Ebola	Dry season birth	none	2nd-3rd			0.0191046		not believe clinic trans	during Ebola	6.2	0	0	0	0	0	0	1	0
792	1	9	Born at facility	Bassa	Yes	5.2	6.24518	0.316456	0.913044	17	born in village	not during Ebola	not during Ebola	not during Ebola	not during Ebola	Dry season birth	none	1st			-0.749645		Believes clinic trans or unsure	during Ebola	5.2	0	0	0	0	0	0	1	0
647	2	54	Not born at facility	Bassa	Yes	5.4	4.20117	0.390625	0.7	29	born in village	not during Ebola	not during Ebola	not during Ebola	not during Ebola	Dry season birth	none	1st			2.53481		Believes clinic trans or unsure	during Ebola	5.4	0	0	0	0	0	0	1	0
814	2	58	Not born at facility	Bassa	Yes	19.8	4.20117	0.390625	0.28	19	born in village	not during Ebola	not during Ebola	not during Ebola	not during Ebola	Dry season birth	none	1st			-0.303237		Believes clinic trans or unsure	during Ebola	10	9.8	0	0	0	0	0	1	0
442	3	62	Born at facility	English	Yes	2	13.7235	0.151899	0.238636	18	NOT born in village	not during Ebola	not during Ebola	not during Ebola	not during Ebola	Rainy season birth	none	1st			0.880197		Believes clinic trans or unsure	during Ebola	2	0	0	0	0	0	0	1	0
1189	2	55	Born at facility	Bassa	Yes	18.4	4.20117	0.390625	0.565217	.i	born in village	not during Ebola	not during Ebola	not during Ebola	not during Ebola	Rainy season birth	none	1st			-0.50333		Believes clinic trans or unsure	during Ebola	10	8.4	0	0	0	0	0	1	0
219	2	31	Not born at facility	Bassa	No	8.2	4.20117	0.390625	0.525	20	born in village	not during Ebola	not during Ebola	not during Ebola	not during Ebola	Rainy season birth	none	4th or higher			-0.0068402		Believes clinic trans or unsure	during Ebola	8.2	0	0	0	0	0	0	1	0
914	3	62	Born at facility	Bassa	Yes	2	13.7235	0.151899	0.238636	19	born in village	not during Ebola	not during Ebola	not during Ebola	not during Ebola	Dry season birth	Some Secondary or more	2nd-3rd	1	1	0.338827	2012	not believe clinic trans	not during Ebola	2	0	0	1	1	1	0	1	1
639	2	24	Not born at facility	Bassa	Yes	6.7	4.20117	0.390625	0.59375	20	born in village	not during Ebola	not during Ebola	not during Ebola	not during Ebola	Rainy season birth	Some primary	2nd-3rd		1	-0.719883		Believes clinic trans or unsure	not during Ebola	6.7	0	0	0	1	0	0	1	0
41	3	62	Not born at facility	English	Yes	2	13.7235	0.151899	0.238636	.i	born in village	not during Ebola	not during Ebola	not during Ebola	not during Ebola	Dry season birth	Some primary	1st			-0.201197		Believes clinic trans or unsure	during Ebola	2	0	0	0	0	0	0	1	0
1365	3	33	Not born at facility	Bassa	Yes	3.4	13.7235	0.151899	0.129231	21	NOT born in village	not during Ebola	not during Ebola	not during Ebola	not during Ebola	Rainy season birth	Some Secondary or more	1st			-0.226639			during Ebola	3.4	0	0	0	0	0	0	1	0
1052	1	9	Born at facility	English	Yes	5.2	6.24518	0.316456	0.913044	19	NOT born in village	not during Ebola	not during Ebola	not during Ebola	not during Ebola	Rainy season birth	none	1st			-0.136176		Believes clinic trans or unsure	during Ebola	5.2	0	0	0	0	0	0	1	0
558	3	25	Born at facility	Bassa	Yes	0.1	13.7235	0.151899	0.212121	22	born in village	not during Ebola	not during Ebola	not during Ebola	not during Ebola	Rainy season birth	Some primary	1st			0.208129		Believes clinic trans or unsure	during Ebola	0.1	0	0	0	0	0	0	1	0
113	1	66	Born at facility	English	Yes	17.7	6.24518	0.316456	0.653846	23	born in village	not during Ebola	not during Ebola	not during Ebola	not during Ebola	Rainy season birth	none	2nd-3rd			-0.651231		Believes clinic trans or unsure	during Ebola	10	7.7	0	0	0	0	0	1	0
834	1	10	Not born at facility	English	No	24.2	6.24518	0.316456	0.2625	21	born in village	not during Ebola	not during Ebola	not during Ebola	not during Ebola	Rainy season birth	Some primary	2nd-3rd	1	1	0.799656	2012	Believes clinic trans or unsure	not during Ebola	10	11	3.2	1	1	1	1	1	1
620	1	1	Born at facility	Bassa	No	20.5	6.24518	0.316456	0.232558	19	born in village	not during Ebola	not during Ebola	not during Ebola	not during Ebola	Rainy season birth	none	1st			-0.749645		Believes clinic trans or unsure	during Ebola	10	10.5	0	0	0	0	0	1	0
881	1	70	Born at facility	Bassa	Yes	32.8	6.24518	0.316456	0.486486	30	born in village	not during Ebola	not during Ebola	not during Ebola	not during Ebola	Dry season birth	none	2nd-3rd			-0.860736		Believes clinic trans or unsure	during Ebola	10	11	11.8	0	0	0	0	1	0
749	2	63	Born at facility	Bassa	Yes	10	4.20117	0.390625	0.48	33	born in village	not during Ebola	not during Ebola	not during Ebola	not during Ebola	Dry season birth	none	1st	4	4	-0.231724	2012		not during Ebola	10	0	0	1	1	1	1	1	1
704	3	53	Born at facility	English	Yes	0.1	13.7235	0.151899	0.0771605	32	NOT born in village	not during Ebola	not during Ebola	not during Ebola	not during Ebola	Dry season birth	none	1st			0.198977		not believe clinic trans	during Ebola	0.1	0	0	0	0	0	0	1	0
595	1	4	Not born at facility	English	Yes	5.6	6.24518	0.316456	0.525	12	born in village	not during Ebola	not during Ebola	not during Ebola	not during Ebola	Dry season birth	none	2nd-3rd			-0.589147		Believes clinic trans or unsure	during Ebola	5.6	0	0	0	0	0	0	1	0
1315	2	41	Born at facility	Bassa	Yes	9.4	4.20117	0.390625	0.913044	18	born in village	not during Ebola	not during Ebola	not during Ebola	not during Ebola	Dry season birth	Some primary	1st		1	-0.860736		not believe clinic trans	not during Ebola	9.4	0	0	0	1	0	0	1	0
113	1	66	Not born at facility	English	Yes	17.7	6.24518	0.316456	0.653846	32	born in village	not during Ebola	not during Ebola	not during Ebola	not during Ebola	Rainy season birth	none	4th or higher			-0.651231		Believes clinic trans or unsure	during Ebola	10	7.7	0	0	0	0	0	1	0
1405	2	35	Not born at facility	Bassa	Yes	11.4	4.20117	0.390625	0.84	28	born in village	not during Ebola	not during Ebola	not during Ebola	not during Ebola	Dry season birth	none	2nd-3rd			-0.325396		Believes clinic trans or unsure	during Ebola	10	1.4	0	0	0	0	0	1	0
1289	2	21	Born at facility	English	Yes	6.2	4.20117	0.390625	0.326316	25	born in village	not during Ebola	not during Ebola	not during Ebola	not during Ebola	Rainy season birth	Some primary	4th or higher	2	2	1.01536	2011	Believes clinic trans or unsure	not during Ebola	6.2	0	0	1	1	0	0	1	1
695	3	46	Born at facility	English	No	0.1	13.7235	0.151899	0.07	32	born in village	not during Ebola	not during Ebola	not during Ebola	not during Ebola	Dry season birth	Some primary	2nd-3rd			0.541494		not believe clinic trans	during Ebola	0.1	0	0	0	0	0	0	1	0
661	1	16	Born at facility	Bassa	Yes	5.5	6.24518	0.316456	0.538462	18	born in village	not during Ebola	not during Ebola	not during Ebola	not during Ebola	Rainy season birth	none	1st			-0.467894		Believes clinic trans or unsure	during Ebola	5.5	0	0	0	0	0	0	1	0
1231	2	41	Born at facility	Bassa	Yes	9.4	4.20117	0.390625	0.913044	20	born in village	not during Ebola	not during Ebola	not during Ebola	not during Ebola	Rainy season birth	none	2nd-3rd			0.246942		Believes clinic trans or unsure	during Ebola	9.4	0	0	0	0	0	0	1	0
719	1	65	Not born at facility	Bassa	Yes	5.4	6.24518	0.316456	0.782609	.i	born in village	not during Ebola	not during Ebola	not during Ebola	not during Ebola	Dry season birth	none	1st			-0.171478		not believe clinic trans	during Ebola	5.4	0	0	0	0	0	0	1	0
1417	1	44	Born at facility	Bassa	Yes	12.4	6.24518	0.316456	0.168	37	born in village	not during Ebola	not during Ebola	not during Ebola	not during Ebola	Dry season birth	none	2nd-3rd		4	-0.48307		Believes clinic trans or unsure	not during Ebola	10	2.4	0	0	1	0	0	1	0
238	2	38	Born at facility	Bassa	Yes	15.9	4.20117	0.390625	0.446808	27	born in village	not during Ebola	not during Ebola	not during Ebola	not during Ebola	Rainy season birth	Some primary	4th or higher	3	3	-0.724898	2012	Believes clinic trans or unsure	not during Ebola	10	5.9	0	1	1	1	1	1	1
888	2	58	Not born at facility	Bassa	No	19.8	4.20117	0.390625	0.28	29	born in village	not during Ebola	not during Ebola	not during Ebola	not during Ebola	Rainy season birth	none	2nd-3rd			0.111103		not believe clinic trans	during Ebola	10	9.8	0	0	0	0	0	1	0
224	1	43	Born at facility	Bassa	Yes	12.4	6.24518	0.316456	0.168	23	NOT born in village	not during Ebola	not during Ebola	not during Ebola	not during Ebola	Rainy season birth	none	2nd-3rd			-0.752947		Believes clinic trans or unsure	during Ebola	10	2.4	0	0	0	0	0	1	0
482	2	63	Born at facility	Bassa	No	10	4.20117	0.390625	0.48	16	born in village	not during Ebola	not during Ebola	not during Ebola	not during Ebola	Rainy season birth	Some primary	1st			-0.860736			during Ebola	10	0	0	0	0	0	0	1	0
1432	2	32	Born at facility	Bassa	Yes	10.5	4.20117	0.390625	0.588235	23	NOT born in village	not during Ebola	not during Ebola	not during Ebola	not during Ebola	Dry season birth	none	1st			-0.487735		not believe clinic trans	during Ebola	10	0.5	0	0	0	0	0	1	0
1439	2	32	Born at facility	Bassa	Yes	9.6	4.20117	0.390625	0.588235	23	born in village	not during Ebola	not during Ebola	not during Ebola	not during Ebola	Rainy season birth	Some primary	2nd-3rd			-0.860736		Believes clinic trans or unsure	during Ebola	9.6	0	0	0	0	0	0	1	0
176	3	62	Born at facility	English	Yes	2	13.7235	0.151899	0.238636	16	NOT born in village	not during Ebola	not during Ebola	not during Ebola	not during Ebola	Rainy season birth	Some primary	2nd-3rd			0.494817		Believes clinic trans or unsure	during Ebola	2	0	0	0	0	0	0	1	0
461	2	59	Born at facility	English	No	5.5	4.20117	0.390625	0.65625	17	born in village	not during Ebola	not during Ebola	not during Ebola	not during Ebola	Rainy season birth	Some Secondary or more	1st	1	1	-0.067	2012	not believe clinic trans	not during Ebola	5.5	0	0	1	1	1	0	1	1
830	1	65	Born at facility	Bassa	Yes	5.2	6.24518	0.316456	0.782609	20	NOT born in village	not during Ebola	not during Ebola	not during Ebola	not during Ebola	Dry season birth	Some primary	2nd-3rd			-0.860736		Believes clinic trans or unsure	during Ebola	5.2	0	0	0	0	0	0	1	0
1396	2	37	Not born at facility	Bassa	Yes	6.9	4.20117	0.390625	0.807692	25	born in village	not during Ebola	not during Ebola	not during Ebola	not during Ebola	Dry season birth	none	2nd-3rd			-0.860736		Believes clinic trans or unsure	during Ebola	6.9	0	0	0	0	0	0	1	0
555	1	5	Born at facility	English	Yes	29.3	6.24518	0.316456	0.642857	14	NOT born in village	not during Ebola	not during Ebola	not during Ebola	not during Ebola	Dry season birth	Some Secondary or more	1st			-0.0970688		Believes clinic trans or unsure	during Ebola	10	11	8.3	0	0	0	0	1	0
739	3	62	Not born at facility	Bassa	Yes	2	13.7235	0.151899	0.238636	26	born in village	not during Ebola	not during Ebola	not during Ebola	not during Ebola	Rainy season birth	none	2nd-3rd			-0.147545		not believe clinic trans	during Ebola	2	0	0	0	0	0	0	1	0
219	2	31	Born at facility	Bassa	Yes	8.2	4.20117	0.390625	0.525	33	born in village	not during Ebola	not during Ebola	not during Ebola	not during Ebola	Rainy season birth	none	4th or higher		4	-0.0068402		Believes clinic trans or unsure	not during Ebola	8.2	0	0	0	1	0	0	1	0
1174	2	54	Born at facility	English	No	5.4	4.20117	0.390625	0.7	22	NOT born in village	not during Ebola	not during Ebola	not during Ebola	not during Ebola	Dry season birth	Some primary	1st		2	2.03721		Believes clinic trans or unsure	not during Ebola	5.4	0	0	0	1	0	0	1	0
64	1	1	Born at facility	English	Yes	20.5	6.24518	0.316456	0.232558	24	NOT born in village	not during Ebola	not during Ebola	not during Ebola	not during Ebola	Dry season birth	Some Secondary or more	2nd-3rd			1.57205		Believes clinic trans or unsure	during Ebola	10	10.5	0	0	0	0	0	1	0
719	1	65	Not born at facility	Bassa	Yes	5.4	6.24518	0.316456	0.782609	13	born in village	not during Ebola	not during Ebola	not during Ebola	not during Ebola	Dry season birth	none	2nd-3rd			-0.171478		not believe clinic trans	during Ebola	5.4	0	0	0	0	0	0	1	0
1294	2	21	Born at facility	Bassa	Yes	6.2	4.20117	0.390625	0.326316	16	born in village	not during Ebola	not during Ebola	not during Ebola	not during Ebola	Dry season birth	Some primary	1st			1.38726		not believe clinic trans	during Ebola	6.2	0	0	0	0	0	0	1	0
550	2	39	Not born at facility	Bassa	Yes	4.9	4.20117	0.390625	0.375	13	born in village	not during Ebola	not during Ebola	not during Ebola	not during Ebola	Dry season birth	none	1st			-0.118849		Believes clinic trans or unsure	during Ebola	4.9	0	0	0	0	0	0	1	0
169	2	36	Not born at facility	Bassa	Yes	5.8	4.20117	0.390625	0.761905	25	born in village	not during Ebola	not during Ebola	not during Ebola	not during Ebola	Dry season birth	none	4th or higher			-0.860736		Believes clinic trans or unsure	not during Ebola	5.8	0	0	0	0	0	0	1	0
555	1	5	Born at facility	English	Yes	29.3	6.24518	0.316456	0.642857	26	NOT born in village	not during Ebola	not during Ebola	not during Ebola	not during Ebola	Rainy season birth	Some Secondary or more	2nd-3rd	3	3	-0.0970688	2011	Believes clinic trans or unsure	not during Ebola	10	11	8.3	1	1	1	0	1	1
1289	2	21	Born at facility	English	Yes	6.2	4.20117	0.390625	0.326316	16	born in village	not during Ebola	not during Ebola	not during Ebola	not during Ebola	Dry season birth	Some primary	1st			1.01536		Believes clinic trans or unsure	during Ebola	6.2	0	0	0	0	0	0	1	0
474	2	28	Not born at facility	Bassa	Yes	8.3	4.20117	0.390625	0.411765	30	born in village	not during Ebola	not during Ebola	not during Ebola	not during Ebola	Rainy season birth	Some Secondary or more	2nd-3rd			1.87272		Believes clinic trans or unsure	during Ebola	8.3	0	0	0	0	0	0	1	0
1441	2	35	Not born at facility	English	No	11.4	4.20117	0.390625	0.84	19	born in village	not during Ebola	not during Ebola	not during Ebola	not during Ebola	Dry season birth	Some primary	1st	1	1	-0.102072	2013	not believe clinic trans	not during Ebola	10	1.4	0	1	1	1	1	1	1
781	2	60	Not born at facility	Bassa	Yes	5.6	4.20117	0.390625	0.28	20	born in village	not during Ebola	not during Ebola	not during Ebola	not during Ebola	Rainy season birth	none	4th or higher			-0.608792		Believes clinic trans or unsure	during Ebola	5.6	0	0	0	0	0	0	1	0
1144	2	23	Born at facility	Bassa	Yes	5.6	4.20117	0.390625	0.583333	30	born in village	not during Ebola	not during Ebola	not during Ebola	not during Ebola	Dry season birth	Some primary	4th or higher	3	3	0.0796723	2012	Believes clinic trans or unsure	not during Ebola	5.6	0	0	1	1	1	0	1	1
1135	1	43	Not born at facility	Bassa	Yes	12.4	6.24518	0.316456	0.168	28	born in village	not during Ebola	not during Ebola	not during Ebola	not during Ebola	Rainy season birth	none	1st	3	3	-0.619751	2012		not during Ebola	10	2.4	0	1	1	1	0	1	1
1204	2	31	Not born at facility	Bassa	Yes	8.2	4.20117	0.390625	0.525	16	born in village	not during Ebola	not during Ebola	not during Ebola	not during Ebola	Rainy season birth	Some primary	1st			-0.59964		not believe clinic trans	during Ebola	8.2	0	0	0	0	0	0	1	0
1178	3	25	Born at facility	English	Yes	0.1	13.7235	0.151899	0.212121	36	born in village	not during Ebola	not during Ebola	not during Ebola	not during Ebola	Rainy season birth	Some primary	4th or higher			0.059857		not believe clinic trans	during Ebola	0.1	0	0	0	0	0	0	1	0
1144	2	23	Not born at facility	Bassa	Yes	5.6	4.20117	0.390625	0.583333	25	born in village	not during Ebola	not during Ebola	not during Ebola	not during Ebola	Dry season birth	Some primary	2nd-3rd			0.0796723		Believes clinic trans or unsure	during Ebola	5.6	0	0	0	0	0	0	1	0
5	1	51	Not born at facility	Bassa	Yes	16.3	6.24518	0.316456	0.365385	26	born in village	not during Ebola	not during Ebola	not during Ebola	not during Ebola	Dry season birth	Some primary	1st		3	-0.724898		Believes clinic trans or unsure	not during Ebola	10	6.3	0	0	1	0	0	1	0
853	3	57	Born at facility	English	Yes	4.4	13.7235	0.151899	0.538462	24	born in village	not during Ebola	not during Ebola	not during Ebola	not during Ebola	Rainy season birth	none	2nd-3rd			-0.0765611		Believes clinic trans or unsure	during Ebola	4.4	0	0	0	0	0	0	1	0
1430	1	44	Not born at facility	Bassa	Yes	12.4	6.24518	0.316456	0.168	.i	born in village	not during Ebola	not during Ebola	not during Ebola	not during Ebola	Dry season birth	none	2nd-3rd			-0.463802		not believe clinic trans	during Ebola	10	2.4	0	0	0	0	0	1	0
555	1	5	Not born at facility	English	Yes	29.3	6.24518	0.316456	0.642857	18	NOT born in village	not during Ebola	not during Ebola	not during Ebola	not during Ebola	Rainy season birth	Some Secondary or more	1st		1	-0.0970688		Believes clinic trans or unsure	not during Ebola	10	11	8.3	0	1	0	0	1	0
690	2	54	Not born at facility	English	Yes	5.4	4.20117	0.390625	0.7	21	born in village	not during Ebola	not during Ebola	not during Ebola	not during Ebola	Rainy season birth	Some primary	2nd-3rd			3.21082		Believes clinic trans or unsure	during Ebola	5.4	0	0	0	0	0	0	1	0
1178	3	25	Born at facility	English	Yes	0.1	13.7235	0.151899	0.212121	35	born in village	not during Ebola	not during Ebola	not during Ebola	not during Ebola	Rainy season birth	Some primary	2nd-3rd			0.059857		not believe clinic trans	during Ebola	0.1	0	0	0	0	0	0	1	0
304	1	8	Born at facility	English	Yes	8.4	6.24518	0.316456	0.35	32	born in village	not during Ebola	not during Ebola	not during Ebola	not during Ebola	Rainy season birth	Some primary	1st	4	4	0.0526204	2012	Believes clinic trans or unsure	not during Ebola	8.4	0	0	1	1	1	0	1	1
1131	3	40	Born at facility	Bassa	Yes	0.1	13.7235	0.151899	0.308823	39	born in village	not during Ebola	not during Ebola	not during Ebola	not during Ebola	Rainy season birth	none	4th or higher		4	-0.0512347		Believes clinic trans or unsure	not during Ebola	0.1	0	0	0	1	0	0	1	0
902	1	2	Born at facility	English	Yes	18.9	6.24518	0.316456	0.18552	19	NOT born in village	not during Ebola	not during Ebola	not during Ebola	not during Ebola	Dry season birth	none	2nd-3rd			-0.488548		Believes clinic trans or unsure	during Ebola	10	8.9	0	0	0	0	0	1	0
844	1	10	Born at facility	English	Yes	24.2	6.24518	0.316456	0.2625	.i	born in village	not during Ebola	not during Ebola	not during Ebola	not during Ebola	Rainy season birth	Some primary	1st			0.271201		not believe clinic trans	during Ebola	10	11	3.2	0	0	0	0	1	0
592	1	67	Not born at facility	Bassa	Yes	5.6	6.24518	0.316456	0.416667	25	born in village	not during Ebola	not during Ebola	not during Ebola	not during Ebola	Dry season birth	none	2nd-3rd			-0.517453		Believes clinic trans or unsure	during Ebola	5.6	0	0	0	0	0	0	1	0
777	1	69	Not born at facility	Bassa	Yes	15.6	6.24518	0.316456	0.590909	23	born in village	not during Ebola	not during Ebola	not during Ebola	not during Ebola	Dry season birth	none	4th or higher			-0.486372		not believe clinic trans	during Ebola	10	5.6	0	0	0	0	0	1	0
159	1	49	Not born at facility	English	Yes	16.9	6.24518	0.316456	0.714286	16	NOT born in village	not during Ebola	not during Ebola	not during Ebola	not during Ebola	Rainy season birth	Some primary	1st			-0.613457		Believes clinic trans or unsure	during Ebola	10	6.9	0	0	0	0	0	1	0
311	1	45	Not born at facility	Bassa	Yes	20.9	6.24518	0.316456	0.333333	39	born in village	not during Ebola	not during Ebola	not during Ebola	not during Ebola	Rainy season birth	none	1st	4	4	-0.609756	2013	Believes clinic trans or unsure	not during Ebola	10	10.9	0	1	1	1	1	1	1
904	1	45	Not born at facility	Bassa	Yes	20.9	6.24518	0.316456	0.333333	29	born in village	not during Ebola	not during Ebola	not during Ebola	not during Ebola	Rainy season birth	none	1st			-0.623573		not believe clinic trans	during Ebola	10	10.9	0	0	0	0	0	1	0
696	2	59	Born at facility	Bassa	Yes	5.5	4.20117	0.390625	0.65625	17	born in village	not during Ebola	not during Ebola	not during Ebola	not during Ebola	Rainy season birth	Some primary	1st			0.620841		Believes clinic trans or unsure	during Ebola	5.5	0	0	0	0	0	0	1	0
613	1	6	Not born at facility	English	No	10.9	6.24518	0.316456	0.287671	23	born in village	not during Ebola	not during Ebola	not during Ebola	not during Ebola	Dry season birth	Some primary	2nd-3rd			0.149298		Believes clinic trans or unsure	during Ebola	10	0.9	0	0	0	0	0	1	0
778	1	50	Born at facility	Bassa	Yes	6.1	6.24518	0.316456	0.4375	27	born in village	not during Ebola	not during Ebola	not during Ebola	not during Ebola	Dry season birth	none	4th or higher			-0.0226402			during Ebola	6.1	0	0	0	0	0	0	1	0
1204	2	31	Not born at facility	Bassa	Yes	8.2	4.20117	0.390625	0.525	19	born in village	not during Ebola	not during Ebola	not during Ebola	not during Ebola	Dry season birth	Some primary	2nd-3rd			-0.59964		not believe clinic trans	during Ebola	8.2	0	0	0	0	0	0	1	0
464	2	28	Born at facility	English	Yes	8.3	4.20117	0.390625	0.411765	22	born in village	not during Ebola	not during Ebola	not during Ebola	not during Ebola	Rainy season birth	Some primary	2nd-3rd	2	2	0.137508	2013	Believes clinic trans or unsure	not during Ebola	8.3	0	0	1	1	1	1	1	1
559	2	27	Born at facility	Bassa	Yes	5.2	4.20117	0.390625	0.75	41	born in village	not during Ebola	not during Ebola	not during Ebola	not during Ebola	Rainy season birth	none	4th or higher	4	4	0.190636	2013	not believe clinic trans	not during Ebola	5.2	0	0	1	1	1	1	1	1
1216	1	11	Not born at facility	English	Yes	16	6.24518	0.316456	0.2	21	born in village	not during Ebola	not during Ebola	not during Ebola	not during Ebola	Rainy season birth	Some primary	1st			-0.406362		Believes clinic trans or unsure	during Ebola	10	6	0	0	0	0	0	1	0
344	1	12	Not born at facility	English	No	19.1	6.24518	0.316456	0.207237	22	NOT born in village	not during Ebola	not during Ebola	not during Ebola	not during Ebola	Dry season birth	Some Secondary or more	1st			-0.643218		not believe clinic trans	during Ebola	10	9.1	0	0	0	0	0	1	0
1434	2	35	Not born at facility	Bassa	No	11.4	4.20117	0.390625	0.84	17	born in village	not during Ebola	not during Ebola	not during Ebola	not during Ebola	Rainy season birth	Some primary	1st	1	1	-0.137578	2012	not believe clinic trans	not during Ebola	10	1.4	0	1	1	1	0	1	1
1365	3	33	Not born at facility	English	No	3.4	13.7235	0.151899	0.129231	20	born in village	not during Ebola	not during Ebola	not during Ebola	not during Ebola	Rainy season birth	none	2nd-3rd			-0.226639			during Ebola	3.4	0	0	0	0	0	0	1	0
546	2	54	Born at facility	Bassa	Yes	13.7	4.20117	0.390625	0.7	21	born in village	not during Ebola	not during Ebola	not during Ebola	not during Ebola	Rainy season birth	Some primary	2nd-3rd	1	1	-0.326568	2011	Believes clinic trans or unsure	not during Ebola	10	3.7	0	1	1	0	0	1	1
1363	3	34	Born at facility	English	Yes	3.4	13.7235	0.151899	0.129231	38	born in village	not during Ebola	not during Ebola	not during Ebola	not during Ebola	Dry season birth	Some primary	2nd-3rd	4	4	-0.0168085	2013	Believes clinic trans or unsure	not during Ebola	3.4	0	0	1	1	1	1	1	1
407	1	69	Born at facility	English	Yes	15.6	6.24518	0.316456	0.590909	29	born in village	not during Ebola	not during Ebola	not during Ebola	not during Ebola	Dry season birth	Some primary	2nd-3rd			-0.860736		not believe clinic trans	during Ebola	10	5.6	0	0	0	0	0	1	0
589	2	58	Not born at facility	Bassa	Yes	19.8	4.20117	0.390625	0.28	.i	born in village	not during Ebola	not during Ebola	not during Ebola	not during Ebola	Dry season birth	none	4th or higher			0.490104		Believes clinic trans or unsure	during Ebola	10	9.8	0	0	0	0	0	1	0
241	1	9	Born at facility	Bassa	Yes	5.2	6.24518	0.316456	0.913044	18	born in village	not during Ebola	not during Ebola	not during Ebola	during Ebola	Rainy season birth	Some primary	1st	1	1	-0.860736	2013	Believes clinic trans or unsure	not during Ebola	5.2	0	0	1	1	1	1	1	1
219	2	31	Born at facility	English	Yes	8.2	4.20117	0.390625	0.525	23	born in village	not during Ebola	not during Ebola	not during Ebola	not during Ebola	Rainy season birth	Some primary	2nd-3rd			-0.0068402		Believes clinic trans or unsure	during Ebola	8.2	0	0	0	0	0	0	1	0
1382	2	37	Not born at facility	Bassa	Yes	6.9	4.20117	0.390625	0.807692	14	born in village	not during Ebola	not during Ebola	not during Ebola	not during Ebola	Dry season birth	none	2nd-3rd			-0.860736		Believes clinic trans or unsure	during Ebola	6.9	0	0	0	0	0	0	1	0
853	3	57	Not born at facility	English	Yes	4.4	13.7235	0.151899	0.538462	17	born in village	not during Ebola	not during Ebola	not during Ebola	not during Ebola	Dry season birth	none	1st			-0.0765611		Believes clinic trans or unsure	during Ebola	4.4	0	0	0	0	0	0	1	0
870	1	43	Born at facility	Bassa	Yes	12.4	6.24518	0.316456	0.168	28	born in village	not during Ebola	not during Ebola	not during Ebola	not during Ebola	Dry season birth	none	2nd-3rd			0.246817		Believes clinic trans or unsure	during Ebola	10	2.4	0	0	0	0	0	1	0
1312	3	34	Born at facility	Bassa	Yes	3.4	13.7235	0.151899	0.129231	24	born in village	not during Ebola	not during Ebola	not during Ebola	not during Ebola	Rainy season birth	Some primary	2nd-3rd		2	-0.163493		not believe clinic trans	not during Ebola	3.4	0	0	0	1	0	0	1	0
1329	3	34	Born at facility	Bassa	No	3.4	13.7235	0.151899	0.129231	16	born in village	not during Ebola	not during Ebola	not during Ebola	not during Ebola	Dry season birth	none	1st			0.0958707		not believe clinic trans	during Ebola	3.4	0	0	0	0	0	0	1	0
1320	1	15	Born at facility	Bassa	Yes	24.5	6.24518	0.316456	0.625	30	born in village	not during Ebola	not during Ebola	not during Ebola	not during Ebola	Dry season birth	Some primary	4th or higher	3	3	0.0666712	2012	Believes clinic trans or unsure	not during Ebola	10	11	3.5	1	1	1	0	1	1
634	2	59	Not born at facility	English	No	5.5	4.20117	0.390625	0.65625	14	NOT born in village	not during Ebola	not during Ebola	not during Ebola	not during Ebola	Rainy season birth	none	1st			0.301728		not believe clinic trans	during Ebola	5.5	0	0	0	0	0	0	1	0
634	2	59	Not born at facility	English	No	5.5	4.20117	0.390625	0.65625	29	NOT born in village	not during Ebola	not during Ebola	not during Ebola	not during Ebola	Dry season birth	none	4th or higher			0.301728		not believe clinic trans	during Ebola	5.5	0	0	0	0	0	0	1	0
838	1	4	Not born at facility	English	Yes	5.6	6.24518	0.316456	0.525	22	born in village	not during Ebola	not during Ebola	not during Ebola	not during Ebola	Rainy season birth	none	1st			0.432132		Believes clinic trans or unsure	during Ebola	5.6	0	0	0	0	0	0	1	0
331	2	39	Born at facility	Bassa	Yes	4.9	4.20117	0.390625	0.375	22	born in village	not during Ebola	not during Ebola	not during Ebola	not during Ebola	Rainy season birth	Some primary	1st	2	2	-0.54448	2012	Believes clinic trans or unsure	not during Ebola	4.9	0	0	1	1	1	0	1	1
883	3	17	Not born at facility	Bassa	No	0.1	13.7235	0.151899	0.196262	.i	NOT born in village	not during Ebola	not during Ebola	not during Ebola	not during Ebola	Dry season birth	none	1st			0.683807		Believes clinic trans or unsure	during Ebola	0.1	0	0	0	0	0	0	1	0
1351	2	19	Not born at facility	English	Yes	6.2	4.20117	0.390625	0.326316	20	born in village	not during Ebola	not during Ebola	not during Ebola	not during Ebola	Rainy season birth	Some primary	4th or higher			0.688202		not believe clinic trans	during Ebola	6.2	0	0	0	0	0	0	1	0
992	2	39	Not born at facility	Bassa	Yes	4.9	4.20117	0.390625	0.375	18	born in village	not during Ebola	not during Ebola	not during Ebola	during Ebola	Rainy season birth	Some primary	1st	1	1	-0.860736	2013	not believe clinic trans	not during Ebola	4.9	0	0	1	1	1	1	1	1
752	2	28	Born at facility	Bassa	Yes	8.3	4.20117	0.390625	0.411765	16	born in village	not during Ebola	not during Ebola	not during Ebola	not during Ebola	Dry season birth	Some primary	1st			0.64459		not believe clinic trans	during Ebola	8.3	0	0	0	0	0	0	1	0
1383	2	20	Born at facility	Bassa	No	6.2	4.20117	0.390625	0.326316	23	NOT born in village	not during Ebola	not during Ebola	not during Ebola	not during Ebola	Rainy season birth	Some Secondary or more	2nd-3rd			-0.613457		Believes clinic trans or unsure	during Ebola	6.2	0	0	0	0	0	0	1	0
397	1	65	Born at facility	English	Yes	5.4	6.24518	0.316456	0.782609	18	born in village	not during Ebola	not during Ebola	not during Ebola	not during Ebola	Dry season birth	none	1st			-0.424268		not believe clinic trans	during Ebola	5.4	0	0	0	0	0	0	1	0
1249	3	42	Born at facility	Bassa	Yes	4.2	13.7235	0.151899	0.55	21	born in village	not during Ebola	not during Ebola	not during Ebola	not during Ebola	Rainy season birth	Some primary	2nd-3rd	1	1	0.0419249	2012	Believes clinic trans or unsure	not during Ebola	4.2	0	0	1	1	1	1	1	1
687	2	55	Not born at facility	Bassa	Yes	18.4	4.20117	0.390625	0.565217	.i	born in village	not during Ebola	not during Ebola	not during Ebola	not during Ebola	Dry season birth	Some primary	2nd-3rd			0.758733		not believe clinic trans	during Ebola	10	8.4	0	0	0	0	0	1	0
1181	2	56	Not born at facility	Bassa	Yes	8.6	4.20117	0.390625	0.709677	27	born in village	not during Ebola	not during Ebola	not during Ebola	not during Ebola	Dry season birth	none	4th or higher			-0.374702		not believe clinic trans	during Ebola	8.6	0	0	0	0	0	0	1	0
508	3	53	Not born at facility	English	No	0.1	13.7235	0.151899	0.0771605	23	born in village	not during Ebola	not during Ebola	not during Ebola	not during Ebola	Rainy season birth	Some Secondary or more	1st			4.15318			during Ebola	0.1	0	0	0	0	0	0	1	0
1450	2	32	Born at facility	Bassa	Yes	10.5	4.20117	0.390625	0.588235	27	born in village	not during Ebola	not during Ebola	not during Ebola	not during Ebola	Dry season birth	Some primary	2nd-3rd		3	-0.749645		not believe clinic trans	not during Ebola	10	0.5	0	0	1	0	0	1	0
494	3	22	Born at facility	Bassa	Yes	0.1	13.7235	0.151899	0.084	22	born in village	not during Ebola	not during Ebola	not during Ebola	not during Ebola	Dry season birth	none	1st			0.455409		not believe clinic trans	during Ebola	0.1	0	0	0	0	0	0	1	0
113	1	66	Born at facility	English	Yes	17.7	6.24518	0.316456	0.653846	31	born in village	not during Ebola	not during Ebola	not during Ebola	not during Ebola	Dry season birth	none	4th or higher			-0.651231		Believes clinic trans or unsure	during Ebola	10	7.7	0	0	0	0	0	1	0
176	3	62	Not born at facility	English	Yes	2	13.7235	0.151899	0.238636	.i	born in village	not during Ebola	not during Ebola	not during Ebola	not during Ebola	Dry season birth	Some primary	2nd-3rd			0.494817		Believes clinic trans or unsure	during Ebola	2	0	0	0	0	0	0	1	0
1286	3	33	Not born at facility	Bassa	Yes	3.4	13.7235	0.151899	0.129231	16	born in village	not during Ebola	not during Ebola	not during Ebola	not during Ebola	Rainy season birth	none	1st			-0.277905		not believe clinic trans	during Ebola	3.4	0	0	0	0	0	0	1	0
1346	1	15	Not born at facility	Bassa	Yes	24.5	6.24518	0.316456	0.625	17	born in village	not during Ebola	not during Ebola	not during Ebola	not during Ebola	Dry season birth	none	2nd-3rd			-0.333065		Believes clinic trans or unsure	during Ebola	10	11	3.5	0	0	0	0	1	0
732	2	31	Not born at facility	Bassa	Yes	8.2	4.20117	0.390625	0.525	20	born in village	not during Ebola	not during Ebola	not during Ebola	not during Ebola	Dry season birth	Some primary	1st			-0.191007		Believes clinic trans or unsure	during Ebola	8.2	0	0	0	0	0	0	1	0
1426	2	32	Born at facility	Bassa	Yes	9.6	4.20117	0.390625	0.588235	30	born in village	not during Ebola	not during Ebola	not during Ebola	not during Ebola	Dry season birth	none	2nd-3rd			-0.860736		not believe clinic trans	during Ebola	9.6	0	0	0	0	0	0	1	0
470	2	60	Born at facility	Bassa	Yes	5.6	4.20117	0.390625	0.28	31	NOT born in village	not during Ebola	not during Ebola	not during Ebola	not during Ebola	Dry season birth	Some primary	1st			1.70764		Believes clinic trans or unsure	during Ebola	5.6	0	0	0	0	0	0	1	0
877	1	67	Born at facility	English	Yes	5.6	6.24518	0.316456	0.416667	25	born in village	not during Ebola	not during Ebola	not during Ebola	not during Ebola	Dry season birth	Some primary	1st			0.482544		Believes clinic trans or unsure	not during Ebola	5.6	0	0	0	0	0	0	1	0
1316	3	42	Not born at facility	Bassa	Yes	4.2	13.7235	0.151899	0.55	22	born in village	not during Ebola	not during Ebola	not during Ebola	not during Ebola	Rainy season birth	Some primary	2nd-3rd			-0.517453		Believes clinic trans or unsure	during Ebola	4.2	0	0	0	0	0	0	1	0
537	1	6	Born at facility	Bassa	Yes	10.9	6.24518	0.316456	0.287671	31	born in village	not during Ebola	not during Ebola	not during Ebola	not during Ebola	Dry season birth	none	1st	3	3	-0.54448	2013	not believe clinic trans	not during Ebola	10	0.9	0	1	1	1	1	1	1
1282	3	33	Born at facility	Bassa	Yes	3.4	13.7235	0.151899	0.129231	21	NOT born in village	not during Ebola	not during Ebola	not during Ebola	not during Ebola	Dry season birth	none	2nd-3rd			2.69236		Believes clinic trans or unsure	during Ebola	3.4	0	0	0	0	0	0	1	0
1172	1	47	Not born at facility	English	Yes	8	6.24518	0.316456	0.328125	32	born in village	not during Ebola	not during Ebola	not during Ebola	not during Ebola	Dry season birth	none	4th or higher			0.288383		Believes clinic trans or unsure	during Ebola	8	0	0	0	0	0	0	1	0
1120	1	66	Not born at facility	English	Yes	15	6.24518	0.316456	0.653846	33	born in village	not during Ebola	not during Ebola	not during Ebola	not during Ebola	Dry season birth	none	2nd-3rd			-0.378763		Believes clinic trans or unsure	during Ebola	10	5	0	0	0	0	0	1	0
289	1	4	Born at facility	English	Yes	5.6	6.24518	0.316456	0.525	25	born in village	not during Ebola	not during Ebola	not during Ebola	not during Ebola	Dry season birth	none	1st			-0.434831		not believe clinic trans	during Ebola	5.6	0	0	0	0	0	0	1	0
126	1	47	Born at facility	Bassa	Yes	8	6.24518	0.316456	0.328125	14	born in village	not during Ebola	not during Ebola	not during Ebola	not during Ebola	Rainy season birth	Some primary	1st			-0.388519		Believes clinic trans or unsure	during Ebola	8	0	0	0	0	0	0	1	0
192	3	22	Born at facility	Bassa	Yes	0.1	13.7235	0.151899	0.084	17	born in village	not during Ebola	not during Ebola	not during Ebola	not during Ebola	Rainy season birth	none	2nd-3rd	1	1	0.519006	2012	Believes clinic trans or unsure	not during Ebola	0.1	0	0	1	1	1	0	1	1
122	3	62	Born at facility	Bassa	Yes	2	13.7235	0.151899	0.238636	17	born in village	not during Ebola	not during Ebola	not during Ebola	not during Ebola	Rainy season birth	Some primary	1st			1.66383		not believe clinic trans	during Ebola	2	0	0	0	0	0	0	1	0
1232	3	42	Not born at facility	Bassa	Yes	4.2	13.7235	0.151899	0.55	.i	born in village	not during Ebola	not during Ebola	not during Ebola	not during Ebola	Dry season birth	none	1st			-0.113034		not believe clinic trans	during Ebola	4.2	0	0	0	0	0	0	1	0
718	1	11	Born at facility	Bassa	Yes	16	6.24518	0.316456	0.2	14	born in village	not during Ebola	not during Ebola	not during Ebola	not during Ebola	Dry season birth	none	1st			-0.095706		Believes clinic trans or unsure	during Ebola	10	6	0	0	0	0	0	1	0
1299	2	20	Born at facility	English	Yes	6.2	4.20117	0.390625	0.326316	16	born in village	not during Ebola	not during Ebola	not during Ebola	not during Ebola	Dry season birth	Some primary	1st	1	1	-0.330873	2012	Believes clinic trans or unsure	not during Ebola	6.2	0	0	1	1	1	0	1	1
596	1	5	Born at facility	English	Yes	29.3	6.24518	0.316456	0.642857	25	born in village	not during Ebola	not during Ebola	not during Ebola	not during Ebola	Dry season birth	Some Secondary or more	1st	2	2	-0.749645	2012	not believe clinic trans	not during Ebola	10	11	8.3	1	1	1	0	1	1
669	1	51	Not born at facility	Bassa	Yes	16.3	6.24518	0.316456	0.365385	29	born in village	not during Ebola	not during Ebola	not during Ebola	not during Ebola	Rainy season birth	none	4th or higher			-0.127423		Believes clinic trans or unsure	during Ebola	10	6.3	0	0	0	0	0	1	0
1086	2	24	Not born at facility	English	Yes	6.7	4.20117	0.390625	0.59375	37	born in village	not during Ebola	not during Ebola	not during Ebola	not during Ebola	Rainy season birth	none	2nd-3rd			-0.0419204		not believe clinic trans	during Ebola	6.7	0	0	0	0	0	0	1	0
702	2	24	Born at facility	English	No	6.7	4.20117	0.390625	0.59375	25	born in village	not during Ebola	not during Ebola	not during Ebola	not during Ebola	Dry season birth	none	2nd-3rd			0.0488662		Believes clinic trans or unsure	during Ebola	6.7	0	0	0	0	0	0	1	0
697	1	10	Born at facility	English	No	24.2	6.24518	0.316456	0.2625	22	NOT born in village	not during Ebola	not during Ebola	not during Ebola	not during Ebola	Dry season birth	Some Secondary or more	1st	2	2	3.75049	2011	Believes clinic trans or unsure	not during Ebola	10	11	3.2	1	1	1	0	1	1
480	1	9	Not born at facility	English	Yes	5.2	6.24518	0.316456	0.913044	19	NOT born in village	not during Ebola	not during Ebola	not during Ebola	not during Ebola	Rainy season birth	Some primary	2nd-3rd			-0.233849		Believes clinic trans or unsure	during Ebola	5.2	0	0	0	0	0	0	1	0
1423	1	44	Not born at facility	Bassa	Yes	12.4	6.24518	0.316456	0.168	13	born in village	not during Ebola	not during Ebola	not during Ebola	not during Ebola	Dry season birth	Some primary	1st			-0.860736		not believe clinic trans	during Ebola	10	2.4	0	0	0	0	0	1	0
1459	1	44	Born at facility	Bassa	Yes	12.4	6.24518	0.316456	0.168	38	born in village	not during Ebola	not during Ebola	not during Ebola	not during Ebola	Dry season birth	none	2nd-3rd		4	-0.139876		Believes clinic trans or unsure	not during Ebola	10	2.4	0	0	1	0	0	1	0
320	1	47	Born at facility	Bassa	Yes	8	6.24518	0.316456	0.328125	26	born in village	not during Ebola	not during Ebola	not during Ebola	not during Ebola	Dry season birth	Some primary	4th or higher			-0.612094		Believes clinic trans or unsure	during Ebola	8	0	0	0	0	0	0	1	0
669	1	51	Not born at facility	Bassa	Yes	16.3	6.24518	0.316456	0.365385	24	born in village	not during Ebola	not during Ebola	not during Ebola	not during Ebola	Rainy season birth	none	4th or higher			-0.127423		Believes clinic trans or unsure	during Ebola	10	6.3	0	0	0	0	0	1	0
1237	3	34	Born at facility	Bassa	No	3.4	13.7235	0.151899	0.129231	34	born in village	not during Ebola	not during Ebola	not during Ebola	not during Ebola	Rainy season birth	none	2nd-3rd	4	4	0.196241	2011	not believe clinic trans	not during Ebola	3.4	0	0	1	1	0	0	1	1
1346	1	15	Born at facility	English	No	24.5	6.24518	0.316456	0.625	14	born in village	not during Ebola	not during Ebola	not during Ebola	not during Ebola	Dry season birth	Some Secondary or more	1st	1	1	-0.333065		Believes clinic trans or unsure	not during Ebola	10	11	3.5	1	1	0	0	1	1
1010	1	11	Born at facility	English	Yes	16	6.24518	0.316456	0.2	17	born in village	not during Ebola	not during Ebola	not during Ebola	not during Ebola	Rainy season birth	Some primary	1st	1	1	-0.261372	2012	Believes clinic trans or unsure	not during Ebola	10	6	0	1	1	1	1	1	1
152	2	63	Not born at facility	Bassa	Yes	10	4.20117	0.390625	0.48	29	born in village	not during Ebola	not during Ebola	not during Ebola	not during Ebola	Dry season birth	none	1st			-0.282374		not believe clinic trans	not during Ebola	10	0	0	0	0	0	0	1	0
810	2	36	Not born at facility	Bassa	Yes	5.8	4.20117	0.390625	0.761905	14	born in village	not during Ebola	not during Ebola	not during Ebola	not during Ebola	Dry season birth	none	2nd-3rd			-0.860736		not believe clinic trans	during Ebola	5.8	0	0	0	0	0	0	1	0
474	2	28	Not born at facility	Bassa	Yes	8.3	4.20117	0.390625	0.411765	25	born in village	not during Ebola	not during Ebola	not during Ebola	not during Ebola	Dry season birth	Some Secondary or more	1st			1.87272		Believes clinic trans or unsure	during Ebola	8.3	0	0	0	0	0	0	1	0
174	1	12	Not born at facility	English	Yes	19.1	6.24518	0.316456	0.207237	15	born in village	not during Ebola	not during Ebola	not during Ebola	not during Ebola	Dry season birth	Some Secondary or more	1st			-0.406362		Believes clinic trans or unsure	during Ebola	10	9.1	0	0	0	0	0	1	0
76	3	52	Born at facility	English	Yes	0.1	13.7235	0.151899	0.0771605	30	born in village	not during Ebola	not during Ebola	not during Ebola	not during Ebola	Rainy season birth	none	2nd-3rd	3	3	1.60476	2013		not during Ebola	0.1	0	0	1	1	1	1	1	1
453	3	46	Born at facility	English	No	0.1	13.7235	0.151899	0.07	24	born in village	not during Ebola	not during Ebola	not during Ebola	not during Ebola	Dry season birth	Some primary	2nd-3rd	2	2	1.474	2012	Believes clinic trans or unsure	not during Ebola	0.1	0	0	1	1	1	0	1	1
1100	2	24	Not born at facility	Bassa	Yes	6.7	4.20117	0.390625	0.59375	30	born in village	not during Ebola	not during Ebola	not during Ebola	not during Ebola	Rainy season birth	none	2nd-3rd			-0.760604		Believes clinic trans or unsure	during Ebola	6.7	0	0	0	0	0	0	1	0
810	2	36	Not born at facility	Bassa	Yes	5.8	4.20117	0.390625	0.761905	.i	born in village	not during Ebola	not during Ebola	not during Ebola	not during Ebola	Rainy season birth	none	1st			-0.860736		not believe clinic trans	during Ebola	5.8	0	0	0	0	0	0	1	0
1387	2	21	Born at facility	English	Yes	6.2	4.20117	0.390625	0.326316	19	born in village	not during Ebola	not during Ebola	not during Ebola	not during Ebola	Dry season birth	none	1st			-0.485189		Believes clinic trans or unsure	during Ebola	6.2	0	0	0	0	0	0	1	0
1245	3	34	Born at facility	English	Yes	3.4	13.7235	0.151899	0.129231	18	NOT born in village	not during Ebola	not during Ebola	not during Ebola	not during Ebola	Rainy season birth	none	1st			-0.0350941		Believes clinic trans or unsure	during Ebola	3.4	0	0	0	0	0	0	1	0
475	3	57	Not born at facility	English	Yes	4.4	13.7235	0.151899	0.538462	22	born in village	not during Ebola	not during Ebola	not during Ebola	not during Ebola	Rainy season birth	Some primary	1st	2	2	0.172768	2012	not believe clinic trans	not during Ebola	4.4	0	0	1	1	1	1	1	1
427	1	16	Born at facility	Bassa	Yes	5.7	6.24518	0.316456	0.538462	37	born in village	not during Ebola	not during Ebola	not during Ebola	not during Ebola	Dry season birth	none	1st			-0.369775		Believes clinic trans or unsure	during Ebola	5.7	0	0	0	0	0	0	1	0
707	1	66	Not born at facility	English	Yes	15	6.24518	0.316456	0.653846	22	born in village	not during Ebola	not during Ebola	not during Ebola	not during Ebola	Dry season birth	none	1st		2	0.275844		not believe clinic trans	not during Ebola	10	5	0	0	1	0	0	1	0
777	1	69	Not born at facility	Bassa	Yes	15.6	6.24518	0.316456	0.590909	18	born in village	not during Ebola	not during Ebola	not during Ebola	not during Ebola	Dry season birth	none	1st			-0.486372		not believe clinic trans	during Ebola	10	5.6	0	0	0	0	0	1	0
476	2	28	Not born at facility	Bassa	Yes	8.3	4.20117	0.390625	0.411765	21	born in village	not during Ebola	not during Ebola	not during Ebola	not during Ebola	Rainy season birth	none	2nd-3rd			0.556427		not believe clinic trans	during Ebola	8.3	0	0	0	0	0	0	1	0
172	3	68	Not born at facility	English	Yes	0.1	13.7235	0.151899	0.145833	16	born in village	not during Ebola	not during Ebola	not during Ebola	not during Ebola	Dry season birth	none	1st			-0.860736		not believe clinic trans	during Ebola	0.1	0	0	0	0	0	0	1	0
111	2	23	Not born at facility	Bassa	Yes	5.6	4.20117	0.390625	0.583333	23	born in village	not during Ebola	not during Ebola	not during Ebola	not during Ebola	Dry season birth	none	4th or higher			-0.374702		Believes clinic trans or unsure	during Ebola	5.6	0	0	0	0	0	0	1	0
1231	2	41	Born at facility	Bassa	Yes	9.4	4.20117	0.390625	0.913044	20	born in village	not during Ebola	not during Ebola	not during Ebola	not during Ebola	Rainy season birth	none	2nd-3rd			0.246942		Believes clinic trans or unsure	during Ebola	9.4	0	0	0	0	0	0	1	0
1241	2	19	Born at facility	English	Yes	6.2	4.20117	0.390625	0.326316	38	born in village	not during Ebola	not during Ebola	not during Ebola	not during Ebola	Dry season birth	none	4th or higher	4	4	1.49396	2012	Believes clinic trans or unsure	not during Ebola	6.2	0	0	1	1	1	0	1	1
1171	3	22	Born at facility	English	Yes	0.1	13.7235	0.151899	0.084	18	born in village	not during Ebola	not during Ebola	not during Ebola	not during Ebola	Dry season birth	Some primary	2nd-3rd	1	1	-0.295837	2013	not believe clinic trans	not during Ebola	0.1	0	0	1	1	1	1	1	1
988	2	29	Not born at facility	Bassa	Yes	19.6	4.20117	0.390625	0.62069	26	born in village	not during Ebola	not during Ebola	not during Ebola	not during Ebola	Rainy season birth	Some primary	4th or higher			-0.238864		Believes clinic trans or unsure	during Ebola	10	9.6	0	0	0	0	0	1	0
26	2	27	Born at facility	Bassa	Yes	5.2	4.20117	0.390625	0.75	31	born in village	not during Ebola	not during Ebola	not during Ebola	not during Ebola	Rainy season birth	none	4th or higher			-0.0786077		Believes clinic trans or unsure	during Ebola	5.2	0	0	0	0	0	0	1	0
750	1	18	Not born at facility	Bassa	Yes	9.6	6.24518	0.316456	1	13	born in village	not during Ebola	not during Ebola	not during Ebola	not during Ebola	Dry season birth	Some primary	1st			-0.473918		Believes clinic trans or unsure	during Ebola	9.6	0	0	0	0	0	0	1	0
1384	2	37	Born at facility	Bassa	Yes	6.9	4.20117	0.390625	0.807692	20	born in village	not during Ebola	not during Ebola	not during Ebola	not during Ebola	Dry season birth	none	4th or higher		1	-0.860736		Believes clinic trans or unsure	not during Ebola	6.9	0	0	0	1	0	0	1	0
1194	1	70	Not born at facility	Bassa	Yes	32.8	6.24518	0.316456	0.486486	22	born in village	not during Ebola	not during Ebola	not during Ebola	not during Ebola	Rainy season birth	Some Secondary or more	2nd-3rd	2	2	-0.367492	2013	not believe clinic trans	not during Ebola	10	11	11.8	1	1	1	1	1	1
1320	1	15	Born at facility	Bassa	Yes	24.5	6.24518	0.316456	0.625	21	NOT born in village	not during Ebola	not during Ebola	not during Ebola	not during Ebola	Rainy season birth	Some primary	2nd-3rd			0.0666712		Believes clinic trans or unsure	during Ebola	10	11	3.5	0	0	0	0	1	0
112	1	43	Born at facility	Bassa	Yes	12.4	6.24518	0.316456	0.168	27	born in village	not during Ebola	not during Ebola	not during Ebola	not during Ebola	Dry season birth	none	2nd-3rd			0.246942		Believes clinic trans or unsure	during Ebola	10	2.4	0	0	0	0	0	1	0
634	2	59	Born at facility	English	No	5.5	4.20117	0.390625	0.65625	21	born in village	not during Ebola	not during Ebola	not during Ebola	not during Ebola	Rainy season birth	Some primary	2nd-3rd	1	1	0.301728	2011	Believes clinic trans or unsure	not during Ebola	5.5	0	0	1	1	0	0	1	1
497	2	31	Not born at facility	Bassa	Yes	8.2	4.20117	0.390625	0.525	29	born in village	not during Ebola	not during Ebola	not during Ebola	not during Ebola	Rainy season birth	none	4th or higher			-0.860736		Believes clinic trans or unsure	during Ebola	8.2	0	0	0	0	0	0	1	0
1464	1	44	Not born at facility	Bassa	No	12.4	6.24518	0.316456	0.168	22	born in village	not during Ebola	not during Ebola	not during Ebola	not during Ebola	Rainy season birth	none	1st			-0.632703		not believe clinic trans	during Ebola	10	2.4	0	0	0	0	0	1	0
1376	2	20	Born at facility	English	Yes	6.2	4.20117	0.390625	0.326316	25	born in village	not during Ebola	not during Ebola	not during Ebola	not during Ebola	Rainy season birth	none	2nd-3rd			0.787353		Believes clinic trans or unsure	during Ebola	6.2	0	0	0	0	0	0	1	0
550	2	39	Not born at facility	Bassa	Yes	4.9	4.20117	0.390625	0.375	20	born in village	not during Ebola	not during Ebola	not during Ebola	not during Ebola	Dry season birth	none	2nd-3rd			-0.118849		Believes clinic trans or unsure	during Ebola	4.9	0	0	0	0	0	0	1	0
551	1	65	Not born at facility	English	Yes	5.4	6.24518	0.316456	0.782609	30	born in village	not during Ebola	not during Ebola	not during Ebola	not during Ebola	Dry season birth	Some primary	2nd-3rd			-0.54448		not believe clinic trans	during Ebola	5.4	0	0	0	0	0	0	1	0
721	2	58	Born at facility	English	Yes	19.8	4.20117	0.390625	0.28	22	born in village	not during Ebola	not during Ebola	not during Ebola	not during Ebola	Rainy season birth	Some Secondary or more	1st		2	-0.116929		Believes clinic trans or unsure	not during Ebola	10	9.8	0	0	1	0	0	1	0
1267	2	41	Not born at facility	Bassa	Yes	9.4	4.20117	0.390625	0.913044	16	born in village	not during Ebola	not during Ebola	not during Ebola	not during Ebola	Dry season birth	none	1st			-0.366129		Believes clinic trans or unsure	during Ebola	9.4	0	0	0	0	0	0	1	0
139	3	53	Born at facility	Bassa	Yes	0.1	13.7235	0.151899	0.0771605	19	born in village	not during Ebola	not during Ebola	not during Ebola	not during Ebola	Rainy season birth	Some Secondary or more	2nd-3rd	1	1	1.51904	2011	not believe clinic trans	not during Ebola	0.1	0	0	1	1	0	0	1	1
773	2	30	Not born at facility	English	Yes	7.5	4.20117	0.390625	0.85	22	born in village	not during Ebola	not during Ebola	not during Ebola	not during Ebola	Dry season birth	Some primary	2nd-3rd	2	2	-0.397637	2013	not believe clinic trans	not during Ebola	7.5	0	0	1	1	1	1	1	1
126	1	47	Born at facility	English	No	8	6.24518	0.316456	0.328125	20	born in village	not during Ebola	not during Ebola	not during Ebola	not during Ebola	Rainy season birth	Some Secondary or more	2nd-3rd			-0.388519		Believes clinic trans or unsure	during Ebola	8	0	0	0	0	0	0	1	0
1121	1	10	Born at facility	English	Yes	24.2	6.24518	0.316456	0.2625	26	NOT born in village	not during Ebola	not during Ebola	not during Ebola	not during Ebola	Rainy season birth	Some Secondary or more	1st	3	3	-0.565567	2011	Believes clinic trans or unsure	not during Ebola	10	11	3.2	1	1	0	0	1	1
604	2	58	Born at facility	Bassa	Yes	19.8	4.20117	0.390625	0.28	17	born in village	not during Ebola	not during Ebola	not during Ebola	not during Ebola	Dry season birth	none	1st			0.106089		not believe clinic trans	during Ebola	10	9.8	0	0	0	0	0	1	0
1078	2	36	Not born at facility	Bassa	No	5.8	4.20117	0.390625	0.761905	26	born in village	not during Ebola	not during Ebola	not during Ebola	not during Ebola	Dry season birth	none	1st		3	-0.749645		Believes clinic trans or unsure	not during Ebola	5.8	0	0	0	1	0	0	1	0
278	1	69	Not born at facility	Bassa	Yes	15.6	6.24518	0.316456	0.590909	22	born in village	not during Ebola	not during Ebola	not during Ebola	not during Ebola	Dry season birth	none	1st			-0.73		not believe clinic trans	during Ebola	10	5.6	0	0	0	0	0	1	0
1179	2	28	Born at facility	Bassa	Yes	8.3	4.20117	0.390625	0.411765	25	born in village	not during Ebola	not during Ebola	not during Ebola	not during Ebola	Dry season birth	Some primary	2nd-3rd	2	2	0.522427	2012	not believe clinic trans	not during Ebola	8.3	0	0	1	1	1	0	1	1
49	1	12	Born at facility	English	Yes	19.1	6.24518	0.316456	0.207237	18	born in village	not during Ebola	not during Ebola	not during Ebola	not during Ebola	Rainy season birth	none	1st			-0.250022		not believe clinic trans	during Ebola	10	9.1	0	0	0	0	0	1	0
679	2	60	Born at facility	English	No	5.6	4.20117	0.390625	0.28	24	NOT born in village	not during Ebola	not during Ebola	not during Ebola	not during Ebola	Rainy season birth	Some Secondary or more	1st			-0.0623797		Believes clinic trans or unsure	during Ebola	5.6	0	0	0	0	0	0	1	0
1426	2	32	Born at facility	Bassa	Yes	9.6	4.20117	0.390625	0.588235	19	born in village	not during Ebola	not during Ebola	not during Ebola	not during Ebola	Rainy season birth	Some primary	1st	1	1	-0.860736		not believe clinic trans	not during Ebola	9.6	0	0	1	1	0	0	1	1
473	2	24	Born at facility	Bassa	Yes	6.7	4.20117	0.390625	0.59375	33	born in village	not during Ebola	not during Ebola	not during Ebola	not during Ebola	Dry season birth	none	4th or higher			-0.395359		not believe clinic trans	during Ebola	6.7	0	0	0	0	0	0	1	0
449	3	52	Not born at facility	English	Yes	0.1	13.7235	0.151899	0.0771605	16	born in village	not during Ebola	not during Ebola	not during Ebola	not during Ebola	Rainy season birth	none	1st			0.928938		Believes clinic trans or unsure	during Ebola	0.1	0	0	0	0	0	0	1	0
1013	2	59	Born at facility	English	Yes	5.5	4.20117	0.390625	0.65625	16	NOT born in village	not during Ebola	not during Ebola	not during Ebola	not during Ebola	Rainy season birth	Some Secondary or more	1st			0.537149		not believe clinic trans	during Ebola	5.5	0	0	0	0	0	0	1	0
588	3	25	Not born at facility	English	Yes	0.1	13.7235	0.151899	0.212121	23	NOT born in village	not during Ebola	not during Ebola	not during Ebola	not during Ebola	Rainy season birth	Some Secondary or more	2nd-3rd			0.738571		not believe clinic trans	during Ebola	0.1	0	0	0	0	0	0	1	0
630	1	4	Born at facility	English	Yes	5.6	6.24518	0.316456	0.525	16	born in village	not during Ebola	not during Ebola	not during Ebola	not during Ebola	Dry season birth	Some primary	2nd-3rd			-0.309486		Believes clinic trans or unsure	during Ebola	5.6	0	0	0	0	0	0	1	0
36	1	16	Born at facility	Bassa	Yes	5.5	6.24518	0.316456	0.538462	31	born in village	not during Ebola	not during Ebola	not during Ebola	not during Ebola	Dry season birth	none	1st	3	3	-0.740493	2013	Believes clinic trans or unsure	not during Ebola	5.5	0	0	1	1	1	1	1	1
74	3	17	Not born at facility	English	Yes	0.1	13.7235	0.151899	0.196262	32	born in village	not during Ebola	not during Ebola	not during Ebola	not during Ebola	Dry season birth	none	1st			2.15381		not believe clinic trans	during Ebola	0.1	0	0	0	0	0	0	1	0
230	1	67	Born at facility	English	No	5.6	6.24518	0.316456	0.416667	32	born in village	not during Ebola	not during Ebola	not during Ebola	not during Ebola	Dry season birth	Some primary	1st	4	4	1.04978	2013	not believe clinic trans	not during Ebola	5.6	0	0	1	1	1	1	1	1
107	1	50	Born at facility	Bassa	Yes	6.1	6.24518	0.316456	0.4375	25	born in village	not during Ebola	not during Ebola	not during Ebola	not during Ebola	Rainy season birth	none	1st	2	2	-0.438053	2011	Believes clinic trans or unsure	not during Ebola	6.1	0	0	1	1	1	0	1	1
85	1	45	Not born at facility	Bassa	No	20.9	6.24518	0.316456	0.333333	20	born in village	not during Ebola	not during Ebola	not during Ebola	not during Ebola	Dry season birth	Some primary	1st			-0.860736		Believes clinic trans or unsure	during Ebola	10	10.9	0	0	0	0	0	1	0
356	3	53	Born at facility	English	Yes	0.1	13.7235	0.151899	0.0771605	40	born in village	not during Ebola	not during Ebola	not during Ebola	not during Ebola	Dry season birth	none	2nd-3rd	4	4	1.81863	2011	not believe clinic trans	not during Ebola	0.1	0	0	1	1	0	0	1	1
381	2	63	Not born at facility	Bassa	Yes	10	4.20117	0.390625	0.48	.i	born in village	not during Ebola	not during Ebola	not during Ebola	not during Ebola	Dry season birth	none	1st			0.356123		not believe clinic trans	during Ebola	10	0	0	0	0	0	0	1	0
768	1	69	Not born at facility	English	Yes	15.6	6.24518	0.316456	0.590909	21	born in village	not during Ebola	not during Ebola	not during Ebola	not during Ebola	Dry season birth	Some primary	2nd-3rd			-0.0512664		not believe clinic trans	during Ebola	10	5.6	0	0	0	0	0	1	0
1113	2	31	Not born at facility	Bassa	Yes	8.2	4.20117	0.390625	0.525	18	born in village	not during Ebola	not during Ebola	not during Ebola	not during Ebola	Dry season birth	none	1st	1	1	-0.860736	2012	not believe clinic trans	not during Ebola	8.2	0	0	1	1	1	0	1	1
1139	1	12	Born at facility	English	Yes	19.1	6.24518	0.316456	0.207237	27	NOT born in village	not during Ebola	not during Ebola	not during Ebola	not during Ebola	Rainy season birth	Some Secondary or more	2nd-3rd			-0.296475		Believes clinic trans or unsure	during Ebola	10	9.1	0	0	0	0	0	1	0
143	2	63	Born at facility	Bassa	Yes	10	4.20117	0.390625	0.48	32	born in village	not during Ebola	not during Ebola	not during Ebola	not during Ebola	Dry season birth	none	1st			-0.0411183		not believe clinic trans	during Ebola	10	0	0	0	0	0	0	1	0
806	3	62	Born at facility	English	No	2	13.7235	0.151899	0.238636	23	NOT born in village	not during Ebola	not during Ebola	not during Ebola	not during Ebola	Dry season birth	none	1st			0.62348		Believes clinic trans or unsure	during Ebola	2	0	0	0	0	0	0	1	0
76	3	52	Not born at facility	English	Yes	0.1	13.7235	0.151899	0.0771605	23	born in village	not during Ebola	not during Ebola	not during Ebola	not during Ebola	Dry season birth	Some primary	1st			1.60476		not believe clinic trans	during Ebola	0.1	0	0	0	0	0	0	1	0
702	2	24	Born at facility	English	No	6.7	4.20117	0.390625	0.59375	27	born in village	not during Ebola	not during Ebola	not during Ebola	not during Ebola	Dry season birth	none	2nd-3rd			0.0488662		Believes clinic trans or unsure	during Ebola	6.7	0	0	0	0	0	0	1	0
1014	2	23	Not born at facility	Bassa	Yes	5.6	4.20117	0.390625	0.583333	15	born in village	not during Ebola	not during Ebola	not during Ebola	not during Ebola	Dry season birth	none	1st			0.34796		Believes clinic trans or unsure	during Ebola	5.6	0	0	0	0	0	0	1	0
480	1	9	Not born at facility	English	Yes	5.2	6.24518	0.316456	0.913044	24	NOT born in village	not during Ebola	not during Ebola	not during Ebola	not during Ebola	Dry season birth	Some primary	4th or higher	2	2	-0.233849	2013	Believes clinic trans or unsure	not during Ebola	5.2	0	0	1	1	1	1	1	1
1382	2	37	Born at facility	Bassa	Yes	6.9	4.20117	0.390625	0.807692	20	born in village	not during Ebola	not during Ebola	not during Ebola	not during Ebola	Dry season birth	none	4th or higher	1	1	-0.860736	2012	Believes clinic trans or unsure	not during Ebola	6.9	0	0	1	1	1	0	1	1
497	2	31	Not born at facility	Bassa	Yes	8.2	4.20117	0.390625	0.525	32	born in village	not during Ebola	not during Ebola	not during Ebola	not during Ebola	Rainy season birth	none	4th or higher			-0.860736		Believes clinic trans or unsure	during Ebola	8.2	0	0	0	0	0	0	1	0
137	3	22	Born at facility	Bassa	No	0.1	13.7235	0.151899	0.084	22	born in village	not during Ebola	not during Ebola	not during Ebola	not during Ebola	Dry season birth	Some primary	2nd-3rd			-0.178689		Believes clinic trans or unsure	during Ebola	0.1	0	0	0	0	0	0	1	0
1234	3	33	Not born at facility	Bassa	Yes	3.4	13.7235	0.151899	0.129231	30	born in village	not during Ebola	not during Ebola	not during Ebola	not during Ebola	Dry season birth	none	2nd-3rd			0.0471138		Believes clinic trans or unsure	during Ebola	3.4	0	0	0	0	0	0	1	0
736	2	60	Born at facility	Bassa	Yes	5.6	4.20117	0.390625	0.28	16	NOT born in village	not during Ebola	not during Ebola	not during Ebola	not during Ebola	Dry season birth	none	2nd-3rd			-0.201197		Believes clinic trans or unsure	during Ebola	5.6	0	0	0	0	0	0	1	0
1409	2	32	Born at facility	Bassa	Yes	10.5	4.20117	0.390625	0.588235	22	born in village	not during Ebola	not during Ebola	not during Ebola	not during Ebola	Rainy season birth	none	1st			-0.605433		not believe clinic trans	during Ebola	10	0.5	0	0	0	0	0	1	0
1057	2	39	Not born at facility	English	No	4.9	4.20117	0.390625	0.375	15	NOT born in village	not during Ebola	not during Ebola	not during Ebola	not during Ebola	Dry season birth	Some primary	1st			-0.740493		Believes clinic trans or unsure	during Ebola	4.9	0	0	0	0	0	0	1	0
1194	1	70	Not born at facility	Bassa	Yes	32.8	6.24518	0.316456	0.486486	16	born in village	not during Ebola	not during Ebola	not during Ebola	not during Ebola	Dry season birth	Some Secondary or more	1st			-0.367492		not believe clinic trans	during Ebola	10	11	11.8	0	0	0	0	1	0
1422	2	32	Not born at facility	Bassa	Yes	10.5	4.20117	0.390625	0.588235	12	born in village	not during Ebola	not during Ebola	not during Ebola	not during Ebola	Rainy season birth	none	2nd-3rd			-0.499006		not believe clinic trans	during Ebola	10	0.5	0	0	0	0	0	1	0
669	1	51	Not born at facility	Bassa	Yes	16.3	6.24518	0.316456	0.365385	12	born in village	not during Ebola	not during Ebola	not during Ebola	not during Ebola	Rainy season birth	none	1st			-0.127423		Believes clinic trans or unsure	during Ebola	10	6.3	0	0	0	0	0	1	0
988	2	29	Not born at facility	Bassa	Yes	19.6	4.20117	0.390625	0.62069	18	born in village	not during Ebola	not during Ebola	not during Ebola	not during Ebola	Rainy season birth	Some primary	2nd-3rd			-0.238864		Believes clinic trans or unsure	during Ebola	10	9.6	0	0	0	0	0	1	0
119	2	63	Not born at facility	Bassa	Yes	10	4.20117	0.390625	0.48	34	born in village	not during Ebola	not during Ebola	not during Ebola	not during Ebola	Dry season birth	none	1st	4	4	-0.494946	2013	Believes clinic trans or unsure	not during Ebola	10	0	0	1	1	1	1	1	1
219	2	31	Not born at facility	Bassa	Yes	8.2	4.20117	0.390625	0.525	.i	born in village	not during Ebola	not during Ebola	not during Ebola	not during Ebola	Dry season birth	none	1st			-0.0068402		Believes clinic trans or unsure	during Ebola	8.2	0	0	0	0	0	0	1	0
1253	2	21	Not born at facility	Bassa	Yes	6.2	4.20117	0.390625	0.326316	17	born in village	not during Ebola	not during Ebola	not during Ebola	not during Ebola	Dry season birth	Some primary	1st			0.0983801		Believes clinic trans or unsure	during Ebola	6.2	0	0	0	0	0	0	1	0
478	2	30	Not born at facility	English	No	7.5	4.20117	0.390625	0.85	38	born in village	not during Ebola	not during Ebola	not during Ebola	not during Ebola	Dry season birth	Some primary	2nd-3rd			-0.685364		not believe clinic trans	during Ebola	7.5	0	0	0	0	0	0	1	0
616	1	11	Not born at facility	English	No	16	6.24518	0.316456	0.2	22	NOT born in village	not during Ebola	not during Ebola	not during Ebola	not during Ebola	Dry season birth	Some Secondary or more	1st			2.50798		Believes clinic trans or unsure	not during Ebola	10	6	0	0	0	0	0	1	0
358	1	1	Born at facility	English	Yes	20.5	6.24518	0.316456	0.232558	20	NOT born in village	not during Ebola	not during Ebola	not during Ebola	not during Ebola	Rainy season birth	Some Secondary or more	2nd-3rd	1	1	3.20411	2012	Believes clinic trans or unsure	not during Ebola	10	10.5	0	1	1	1	0	1	1
700	3	53	Born at facility	English	No	0.1	13.7235	0.151899	0.0771605	22	born in village	not during Ebola	not during Ebola	not during Ebola	not during Ebola	Rainy season birth	Some primary	2nd-3rd			1.75179		not believe clinic trans	during Ebola	0.1	0	0	0	0	0	0	1	0
424	2	60	Born at facility	Bassa	Yes	5.6	4.20117	0.390625	0.28	22	born in village	not during Ebola	not during Ebola	not during Ebola	not during Ebola	Rainy season birth	none	4th or higher	2	2	-0.613457	2011	Believes clinic trans or unsure	not during Ebola	5.6	0	0	1	1	1	0	1	1
1426	2	32	Not born at facility	Bassa	Yes	9.6	4.20117	0.390625	0.588235	16	born in village	not during Ebola	not during Ebola	not during Ebola	not during Ebola	Dry season birth	none	1st			-0.860736		not believe clinic trans	during Ebola	9.6	0	0	0	0	0	0	1	0
1459	1	44	Born at facility	Bassa	Yes	12.4	6.24518	0.316456	0.168	34	born in village	not during Ebola	not during Ebola	not during Ebola	not during Ebola	Dry season birth	none	1st			-0.139876		Believes clinic trans or unsure	during Ebola	10	2.4	0	0	0	0	0	1	0
197	2	55	Born at facility	Bassa	Yes	18.4	4.20117	0.390625	0.565217	16	born in village	not during Ebola	not during Ebola	not during Ebola	not during Ebola	Dry season birth	Some primary	4th or higher			-0.130861		not believe clinic trans	during Ebola	10	8.4	0	0	0	0	0	1	0
1379	3	34	Not born at facility	Bassa	No	3.4	13.7235	0.151899	0.129231	19	born in village	not during Ebola	not during Ebola	not during Ebola	not during Ebola	Dry season birth	Some Secondary or more	2nd-3rd			0.638063		Believes clinic trans or unsure	during Ebola	3.4	0	0	0	0	0	0	1	0
1061	1	50	Born at facility	Bassa	Yes	6.1	6.24518	0.316456	0.4375	26	born in village	not during Ebola	not during Ebola	not during Ebola	not during Ebola	Rainy season birth	none	1st	3	3	-0.441987	2013	Believes clinic trans or unsure	not during Ebola	6.1	0	0	1	1	1	1	1	1
1452	2	32	Born at facility	English	Yes	10.5	4.20117	0.390625	0.588235	30	born in village	not during Ebola	not during Ebola	not during Ebola	not during Ebola	Dry season birth	none	2nd-3rd			-0.219301		not believe clinic trans	not during Ebola	10	0.5	0	0	0	0	0	1	0
897	2	38	Not born at facility	Bassa	Yes	15.9	4.20117	0.390625	0.446808	33	born in village	not during Ebola	not during Ebola	not during Ebola	not during Ebola	Rainy season birth	none	1st			-0.860736		not believe clinic trans	during Ebola	10	5.9	0	0	0	0	0	1	0
666	1	65	Born at facility	English	No	5.4	6.24518	0.316456	0.782609	24	born in village	not during Ebola	not during Ebola	not during Ebola	not during Ebola	Dry season birth	Some primary	1st	2	2	-0.429283	2013	Believes clinic trans or unsure	not during Ebola	5.4	0	0	1	1	1	1	1	1
443	2	24	Not born at facility	Bassa	Yes	6.7	4.20117	0.390625	0.59375	22	born in village	not during Ebola	not during Ebola	not during Ebola	not during Ebola	Dry season birth	Some primary	1st			-0.231108		Believes clinic trans or unsure	during Ebola	6.7	0	0	0	0	0	0	1	0
407	1	69	Not born at facility	English	Yes	15.6	6.24518	0.316456	0.590909	31	born in village	not during Ebola	not during Ebola	not during Ebola	not during Ebola	Dry season birth	Some primary	4th or higher			-0.860736		not believe clinic trans	not during Ebola	10	5.6	0	0	0	0	0	1	0
739	3	62	Not born at facility	Bassa	Yes	2	13.7235	0.151899	0.238636	32	born in village	not during Ebola	not during Ebola	not during Ebola	not during Ebola	Dry season birth	none	4th or higher			-0.147545		not believe clinic trans	during Ebola	2	0	0	0	0	0	0	1	0
532	2	60	Born at facility	English	Yes	5.6	4.20117	0.390625	0.28	32	born in village	not during Ebola	not during Ebola	not during Ebola	not during Ebola	Rainy season birth	none	4th or higher	4	4	-0.468903	2013	not believe clinic trans	not during Ebola	5.6	0	0	1	1	1	1	1	1
1235	2	19	Not born at facility	English	Yes	6.2	4.20117	0.390625	0.326316	28	born in village	not during Ebola	not during Ebola	not during Ebola	not during Ebola	Rainy season birth	Some primary	4th or higher			0.0327253		not believe clinic trans	during Ebola	6.2	0	0	0	0	0	0	1	0
682	1	2	Born at facility	English	Yes	18.9	6.24518	0.316456	0.18552	22	born in village	not during Ebola	not during Ebola	not during Ebola	not during Ebola	Rainy season birth	Some primary	1st			-0.395226		Believes clinic trans or unsure	during Ebola	10	8.9	0	0	0	0	0	1	0
1031	2	26	Born at facility	Bassa	Yes	11.2	4.20117	0.390625	0.636364	31	born in village	not during Ebola	not during Ebola	not during Ebola	not during Ebola	Dry season birth	none	4th or higher	3	3	-0.860736	2012	not believe clinic trans	not during Ebola	10	1.2	0	1	1	1	0	1	1
637	1	6	Born at facility	English	Yes	10.9	6.24518	0.316456	0.287671	28	born in village	not during Ebola	not during Ebola	not during Ebola	not during Ebola	Dry season birth	Some primary	4th or higher	3	3	0.270085	2011	Believes clinic trans or unsure	not during Ebola	10	0.9	0	1	1	1	0	1	1
1312	3	34	Born at facility	Bassa	Yes	3.4	13.7235	0.151899	0.129231	17	born in village	not during Ebola	not during Ebola	not during Ebola	not during Ebola	Rainy season birth	Some primary	1st			-0.163493		not believe clinic trans	during Ebola	3.4	0	0	0	0	0	0	1	0
624	2	30	Not born at facility	Bassa	Yes	7.5	4.20117	0.390625	0.85	19	born in village	not during Ebola	not during Ebola	not during Ebola	not during Ebola	Rainy season birth	Some primary	2nd-3rd	1	1	-0.860736	2012	not believe clinic trans	not during Ebola	7.5	0	0	1	1	1	1	1	1
49	1	12	Born at facility	English	Yes	19.1	6.24518	0.316456	0.207237	25	born in village	not during Ebola	not during Ebola	not during Ebola	not during Ebola	Dry season birth	none	2nd-3rd	2	2	-0.250022	2011	not believe clinic trans	not during Ebola	10	9.1	0	1	1	1	0	1	1
846	1	66	Born at facility	English	Yes	15	6.24518	0.316456	0.653846	20	born in village	not during Ebola	not during Ebola	not during Ebola	not during Ebola	Rainy season birth	none	1st			-0.282345		Believes clinic trans or unsure	during Ebola	10	5	0	0	0	0	0	1	0
223	2	28	Not born at facility	English	No	8.3	4.20117	0.390625	0.411765	25	born in village	not during Ebola	not during Ebola	not during Ebola	not during Ebola	Rainy season birth	Some Secondary or more	1st			0.115029		Believes clinic trans or unsure	during Ebola	8.3	0	0	0	0	0	0	1	0
870	1	43	Not born at facility	Bassa	Yes	12.4	6.24518	0.316456	0.168	26	born in village	not during Ebola	not during Ebola	not during Ebola	not during Ebola	Dry season birth	none	1st			0.246817		Believes clinic trans or unsure	during Ebola	10	2.4	0	0	0	0	0	1	0
315	1	67	Born at facility	English	Yes	5.6	6.24518	0.316456	0.416667	20	born in village	not during Ebola	not during Ebola	not during Ebola	not during Ebola	Rainy season birth	Some primary	2nd-3rd			-0.0929033		not believe clinic trans	during Ebola	5.6	0	0	0	0	0	0	1	0
319	1	66	Born at facility	English	Yes	15	6.24518	0.316456	0.653846	30	born in village	not during Ebola	not during Ebola	not during Ebola	not during Ebola	Rainy season birth	Some primary	4th or higher			0.22637		not believe clinic trans	during Ebola	10	5	0	0	0	0	0	1	0
214	2	55	Not born at facility	Bassa	Yes	18.4	4.20117	0.390625	0.565217	22	born in village	not during Ebola	not during Ebola	not during Ebola	not during Ebola	Dry season birth	Some primary	4th or higher	2	2	-0.486372	2011	Believes clinic trans or unsure	not during Ebola	10	8.4	0	1	1	1	0	1	1
859	2	29	Not born at facility	Bassa	Yes	19.6	4.20117	0.390625	0.62069	31	born in village	not during Ebola	not during Ebola	not during Ebola	not during Ebola	Dry season birth	none	4th or higher		3	-0.252681		not believe clinic trans	not during Ebola	10	9.6	0	0	1	0	0	1	1
897	2	38	Not born at facility	Bassa	Yes	15.9	4.20117	0.390625	0.446808	37	born in village	not during Ebola	not during Ebola	not during Ebola	not during Ebola	Dry season birth	none	2nd-3rd	4	4	-0.860736	2012	not believe clinic trans	not during Ebola	10	5.9	0	1	1	1	1	1	1
1168	1	45	Not born at facility	Bassa	Yes	20.9	6.24518	0.316456	0.333333	23	born in village	not during Ebola	not during Ebola	not during Ebola	not during Ebola	Dry season birth	none	1st	2	2	-0.39554	2012	Believes clinic trans or unsure	not during Ebola	10	10.9	0	1	1	1	1	1	1
140	2	38	Born at facility	Bassa	Yes	15.9	4.20117	0.390625	0.446808	15	born in village	not during Ebola	not during Ebola	not during Ebola	not during Ebola	Dry season birth	none	2nd-3rd	1	1	-0.486372	2011	Believes clinic trans or unsure	not during Ebola	10	5.9	0	1	1	0	0	1	1
1071	1	7	Born at facility	Bassa	Yes	16.1	6.24518	0.316456	0.4	30	NOT born in village	not during Ebola	not during Ebola	not during Ebola	not during Ebola	Dry season birth	none	2nd-3rd			-0.689267		Believes clinic trans or unsure	during Ebola	10	6.1	0	0	0	0	0	1	0
446	3	62	Born at facility	English	Yes	2	13.7235	0.151899	0.238636	16	NOT born in village	not during Ebola	not during Ebola	not during Ebola	not during Ebola	Rainy season birth	Some primary	1st			0.219188		Believes clinic trans or unsure	during Ebola	2	0	0	0	0	0	0	1	0
217	1	15	Born at facility	Bassa	Yes	24.5	6.24518	0.316456	0.625	20	born in village	not during Ebola	not during Ebola	not during Ebola	not during Ebola	Rainy season birth	none	1st			0.0166318		Believes clinic trans or unsure	during Ebola	10	11	3.5	0	0	0	0	1	0
780	1	13	Not born at facility	English	Yes	19.1	6.24518	0.316456	0.207237	34	NOT born in village	not during Ebola	not during Ebola	not during Ebola	not during Ebola	Dry season birth	Some Secondary or more	4th or higher			3.01045		not believe clinic trans	during Ebola	10	9.1	0	0	0	0	0	1	0
74	3	17	Not born at facility	English	Yes	0.1	13.7235	0.151899	0.196262	35	born in village	not during Ebola	not during Ebola	not during Ebola	not during Ebola	Rainy season birth	none	2nd-3rd			2.15381		not believe clinic trans	during Ebola	0.1	0	0	0	0	0	0	1	0
634	2	59	Not born at facility	English	No	5.5	4.20117	0.390625	0.65625	17	NOT born in village	not during Ebola	not during Ebola	not during Ebola	not during Ebola	Dry season birth	none	2nd-3rd			0.301728		not believe clinic trans	during Ebola	5.5	0	0	0	0	0	0	1	0
885	3	68	Not born at facility	English	Yes	0.1	13.7235	0.151899	0.145833	23	born in village	not during Ebola	not during Ebola	not during Ebola	not during Ebola	Dry season birth	Some primary	2nd-3rd		2	3.63173		Believes clinic trans or unsure	not during Ebola	0.1	0	0	0	1	0	0	1	0
1405	2	35	Born at facility	Bassa	No	11.4	4.20117	0.390625	0.84	23	NOT born in village	not during Ebola	not during Ebola	not during Ebola	not during Ebola	Dry season birth	Some primary	1st	2	2	-0.325396	2013	not believe clinic trans	not during Ebola	10	1.4	0	1	1	1	1	1	1
155	3	53	Born at facility	English	Yes	0.1	13.7235	0.151899	0.0771605	28	born in village	not during Ebola	not during Ebola	not during Ebola	not during Ebola	Dry season birth	Some primary	2nd-3rd			3.38764		not believe clinic trans	during Ebola	0.1	0	0	0	0	0	0	1	0
1008	3	53	Born at facility	Bassa	Yes	0.1	13.7235	0.151899	0.0771605	31	born in village	not during Ebola	not during Ebola	not during Ebola	not during Ebola	Rainy season birth	Some primary	4th or higher			-0.574272		not believe clinic trans	during Ebola	0.1	0	0	0	0	0	0	1	0
1280	2	19	Not born at facility	Bassa	Yes	6.2	4.20117	0.390625	0.326316	21	born in village	not during Ebola	not during Ebola	not during Ebola	not during Ebola	Rainy season birth	none	1st	1	1	-0.0875182	2011	not believe clinic trans	not during Ebola	6.2	0	0	1	1	0	0	1	1
879	2	61	Born at facility	English	Yes	11.6	4.20117	0.390625	0.809524	26	born in village	not during Ebola	not during Ebola	not during Ebola	not during Ebola	Rainy season birth	none	1st			1.25253		Believes clinic trans or unsure	during Ebola	10	1.6	0	0	0	0	0	1	0
810	2	36	Not born at facility	Bassa	Yes	5.8	4.20117	0.390625	0.761905	.i	born in village	not during Ebola	not during Ebola	not during Ebola	not during Ebola	Dry season birth	none	2nd-3rd			-0.860736		not believe clinic trans	during Ebola	5.8	0	0	0	0	0	0	1	0
283	2	38	Not born at facility	Bassa	Yes	15.9	4.20117	0.390625	0.446808	25	born in village	not during Ebola	not during Ebola	not during Ebola	not during Ebola	Dry season birth	none	2nd-3rd			-0.860736		Believes clinic trans or unsure	during Ebola	10	5.9	0	0	0	0	0	1	0
56	1	4	Not born at facility	Bassa	Yes	5.6	6.24518	0.316456	0.525	23	born in village	not during Ebola	not during Ebola	not during Ebola	not during Ebola	Dry season birth	none	2nd-3rd	2	2	-0.513993	2013	Believes clinic trans or unsure	not during Ebola	5.6	0	0	1	1	1	1	1	1
451	3	40	Born at facility	Bassa	Yes	0.1	13.7235	0.151899	0.308823	.i	born in village	not during Ebola	not during Ebola	not during Ebola	not during Ebola	Rainy season birth	none	1st			0.960013		Believes clinic trans or unsure	during Ebola	0.1	0	0	0	0	0	0	1	0
1001	1	66	Born at facility	English	Yes	15	6.24518	0.316456	0.653846	.i	born in village	not during Ebola	not during Ebola	not during Ebola	not during Ebola	Dry season birth	none	2nd-3rd			-0.530987		not believe clinic trans	during Ebola	10	5	0	0	0	0	0	1	0
426	1	8	Not born at facility	Bassa	Yes	8.4	6.24518	0.316456	0.35	28	born in village	not during Ebola	not during Ebola	not during Ebola	not during Ebola	Rainy season birth	none	1st			-0.330263		Believes clinic trans or unsure	during Ebola	8.4	0	0	0	0	0	0	1	0
497	2	31	Not born at facility	Bassa	Yes	8.2	4.20117	0.390625	0.525	22	born in village	not during Ebola	not during Ebola	not during Ebola	not during Ebola	Dry season birth	none	4th or higher			-0.860736		Believes clinic trans or unsure	during Ebola	8.2	0	0	0	0	0	0	1	0
1384	2	37	Not born at facility	Bassa	Yes	6.9	4.20117	0.390625	0.807692	.i	born in village	not during Ebola	not during Ebola	not during Ebola	not during Ebola	Dry season birth	none	1st			-0.860736		Believes clinic trans or unsure	during Ebola	6.9	0	0	0	0	0	0	1	0
169	2	36	Not born at facility	Bassa	Yes	5.8	4.20117	0.390625	0.761905	20	born in village	not during Ebola	not during Ebola	not during Ebola	not during Ebola	Rainy season birth	none	2nd-3rd			-0.860736		Believes clinic trans or unsure	during Ebola	5.8	0	0	0	0	0	0	1	0
988	2	29	Not born at facility	Bassa	Yes	19.6	4.20117	0.390625	0.62069	24	born in village	not during Ebola	not during Ebola	not during Ebola	not during Ebola	Dry season birth	Some primary	2nd-3rd			-0.238864		Believes clinic trans or unsure	during Ebola	10	9.6	0	0	0	0	0	1	0
480	1	9	Not born at facility	English	Yes	5.2	6.24518	0.316456	0.913044	18	NOT born in village	not during Ebola	not during Ebola	not during Ebola	not during Ebola	Dry season birth	Some primary	1st	1	1	-0.233849	2012	Believes clinic trans or unsure	not during Ebola	5.2	0	0	1	1	1	0	1	1
1063	2	26	Born at facility	Bassa	Yes	11.2	4.20117	0.390625	0.636364	.i	born in village	not during Ebola	not during Ebola	not during Ebola	not during Ebola	Rainy season birth	Some primary	2nd-3rd			0.35291		not believe clinic trans	during Ebola	10	1.2	0	0	0	0	0	1	0
1359	2	37	Not born at facility	Bassa	Yes	6.9	4.20117	0.390625	0.807692	.i	born in village	not during Ebola	not during Ebola	not during Ebola	not during Ebola	Dry season birth	none	1st			-0.860736		not believe clinic trans	during Ebola	6.9	0	0	0	0	0	0	1	0
1187	3	40	Born at facility	Bassa	Yes	0.1	13.7235	0.151899	0.308823	18	born in village	not during Ebola	not during Ebola	not during Ebola	not during Ebola	Rainy season birth	Some primary	1st	1	1	-0.317809		not believe clinic trans	not during Ebola	0.1	0	0	1	1	0	0	1	1
1465	2	35	Not born at facility	Bassa	Yes	11.4	4.20117	0.390625	0.84	31	born in village	not during Ebola	not during Ebola	not during Ebola	not during Ebola	Dry season birth	none	2nd-3rd			-0.473918		Believes clinic trans or unsure	during Ebola	10	1.4	0	0	0	0	0	1	0
991	3	17	Born at facility	English	Yes	0.1	13.7235	0.151899	0.196262	34	born in village	not during Ebola	not during Ebola	not during Ebola	not during Ebola	Rainy season birth	Some primary	4th or higher	4	4	-0.257912		Believes clinic trans or unsure	not during Ebola	0.1	0	0	1	1	0	0	1	1
992	2	39	Not born at facility	Bassa	Yes	4.9	4.20117	0.390625	0.375	18	born in village	not during Ebola	not during Ebola	not during Ebola	not during Ebola	Rainy season birth	Some primary	1st			-0.860736		Believes clinic trans or unsure	during Ebola	4.9	0	0	0	0	0	0	1	0
1009	1	8	Born at facility	Bassa	Yes	8.4	6.24518	0.316456	0.35	20	born in village	not during Ebola	not during Ebola	not during Ebola	not during Ebola	Dry season birth	none	1st			-0.12573		not believe clinic trans	during Ebola	8.4	0	0	0	0	0	0	1	0
1094	2	36	Not born at facility	Bassa	Yes	5.8	4.20117	0.390625	0.761905	23	born in village	not during Ebola	not during Ebola	not during Ebola	not during Ebola	Rainy season birth	none	1st			-0.584045		Believes clinic trans or unsure	during Ebola	5.8	0	0	0	0	0	0	1	0
1181	2	56	Born at facility	Bassa	Yes	8.6	4.20117	0.390625	0.709677	32	born in village	not during Ebola	not during Ebola	not during Ebola	not during Ebola	Dry season birth	none	4th or higher	4	4	-0.374702	2012	not believe clinic trans	not during Ebola	8.6	0	0	1	1	1	1	1	1
683	3	46	Not born at facility	English	Yes	0.1	13.7235	0.151899	0.07	34	born in village	not during Ebola	not during Ebola	not during Ebola	not during Ebola	Dry season birth	Some primary	4th or higher			0.601063		Believes clinic trans or unsure	during Ebola	0.1	0	0	0	0	0	0	1	0
943	1	43	Not born at facility	Bassa	Yes	12.4	6.24518	0.316456	0.168	19	born in village	not during Ebola	not during Ebola	not during Ebola	not during Ebola	Dry season birth	none	1st	1	1	-0.740493	2012	Believes clinic trans or unsure	not during Ebola	10	2.4	0	1	1	1	0	1	1
702	2	24	Not born at facility	English	No	6.7	4.20117	0.390625	0.59375	16	born in village	not during Ebola	not during Ebola	not during Ebola	not during Ebola	Dry season birth	none	1st			0.0488662		Believes clinic trans or unsure	during Ebola	6.7	0	0	0	0	0	0	1	0
257	1	51	Born at facility	Bassa	No	16.3	6.24518	0.316456	0.365385	17	born in village	not during Ebola	not during Ebola	not during Ebola	not during Ebola	Dry season birth	none	1st	1	1	0.21718	2012	Believes clinic trans or unsure	not during Ebola	10	6.3	0	1	1	1	0	1	1
403	1	16	Not born at facility	English	No	5.5	6.24518	0.316456	0.538462	22	born in village	not during Ebola	not during Ebola	not during Ebola	not during Ebola	Dry season birth	Some Secondary or more	2nd-3rd			-0.589147		Believes clinic trans or unsure	during Ebola	5.5	0	0	0	0	0	0	1	0
487	1	11	Born at facility	English	Yes	16	6.24518	0.316456	0.2	.i	NOT born in village	not during Ebola	not during Ebola	not during Ebola	not during Ebola	Dry season birth	Some Secondary or more	1st			1.19293		Believes clinic trans or unsure	during Ebola	10	6	0	0	0	0	0	1	0
505	1	12	Born at facility	English	Yes	19.1	6.24518	0.316456	0.207237	26	NOT born in village	not during Ebola	not during Ebola	not during Ebola	not during Ebola	Dry season birth	Some Secondary or more	2nd-3rd			-0.382122		Believes clinic trans or unsure	not during Ebola	10	9.1	0	0	0	0	0	1	0
1377	3	34	Not born at facility	Bassa	No	3.4	13.7235	0.151899	0.129231	24	born in village	not during Ebola	not during Ebola	not during Ebola	not during Ebola	Dry season birth	Some primary	4th or higher			0.58858		not believe clinic trans	during Ebola	3.4	0	0	0	0	0	0	1	0
726	2	63	Not born at facility	English	Yes	10	4.20117	0.390625	0.48	17	born in village	not during Ebola	not during Ebola	not during Ebola	not during Ebola	Dry season birth	Some primary	1st			-0.0512347		Believes clinic trans or unsure	during Ebola	10	0	0	0	0	0	0	1	0
816	2	26	Not born at facility	English	No	11.2	4.20117	0.390625	0.636364	36	born in village	not during Ebola	not during Ebola	not during Ebola	not during Ebola	Dry season birth	none	2nd-3rd	4	4	-0.319574	2013	not believe clinic trans	not during Ebola	10	1.2	0	1	1	1	1	1	1
683	3	46	Born at facility	English	Yes	0.1	13.7235	0.151899	0.07	27	born in village	not during Ebola	not during Ebola	not during Ebola	not during Ebola	Dry season birth	Some primary	2nd-3rd			0.601063		Believes clinic trans or unsure	during Ebola	0.1	0	0	0	0	0	0	1	0
1096	3	22	Not born at facility	Bassa	Yes	0.1	13.7235	0.151899	0.084	23	born in village	not during Ebola	not during Ebola	not during Ebola	not during Ebola	Rainy season birth	Some primary	4th or higher			-0.1651		Believes clinic trans or unsure	during Ebola	0.1	0	0	0	0	0	0	1	0
981	2	23	Born at facility	English	No	5.6	4.20117	0.390625	0.583333	19	born in village	not during Ebola	not during Ebola	not during Ebola	not during Ebola	Rainy season birth	none	1st			-0.319574		Believes clinic trans or unsure	during Ebola	5.6	0	0	0	0	0	0	1	0
1077	1	9	Not born at facility	Bassa	Yes	5.2	6.24518	0.316456	0.913044	34	born in village	not during Ebola	not during Ebola	not during Ebola	not during Ebola	Rainy season birth	none	2nd-3rd			-0.73		Believes clinic trans or unsure	during Ebola	5.2	0	0	0	0	0	0	1	0
465	3	53	Born at facility	English	Yes	0.1	13.7235	0.151899	0.0771605	14	born in village	not during Ebola	not during Ebola	not during Ebola	not during Ebola	Rainy season birth	Some Secondary or more	1st			1.38268		Believes clinic trans or unsure	during Ebola	0.1	0	0	0	0	0	0	1	0
407	1	69	Not born at facility	English	Yes	15.6	6.24518	0.316456	0.590909	28	born in village	not during Ebola	not during Ebola	not during Ebola	not during Ebola	Dry season birth	Some primary	1st			-0.860736		not believe clinic trans	during Ebola	10	5.6	0	0	0	0	0	1	0
146	1	69	Not born at facility	Bassa	Yes	15.6	6.24518	0.316456	0.590909	21	born in village	not during Ebola	not during Ebola	not during Ebola	not during Ebola	Rainy season birth	Some primary	2nd-3rd	1	1	-0.73	2012	Believes clinic trans or unsure	not during Ebola	10	5.6	0	1	1	1	0	1	1
1410	1	44	Born at facility	Bassa	No	12.4	6.24518	0.316456	0.168	28	born in village	not during Ebola	not during Ebola	not during Ebola	not during Ebola	Rainy season birth	none	2nd-3rd	3	3	0.337411	2012	not believe clinic trans	not during Ebola	10	2.4	0	1	1	1	0	1	1
1435	2	19	Not born at facility	Bassa	Yes	6.2	4.20117	0.390625	0.326316	24	born in village	not during Ebola	not during Ebola	not during Ebola	not during Ebola	Rainy season birth	none	4th or higher	2	2	-0.860736	2013	Believes clinic trans or unsure	not during Ebola	6.2	0	0	1	1	1	1	1	1
592	1	67	Not born at facility	Bassa	Yes	5.6	6.24518	0.316456	0.416667	23	born in village	not during Ebola	not during Ebola	not during Ebola	not during Ebola	Dry season birth	none	1st			-0.517453		Believes clinic trans or unsure	during Ebola	5.6	0	0	0	0	0	0	1	0
458	2	26	Not born at facility	Bassa	No	11.2	4.20117	0.390625	0.636364	14	born in village	not during Ebola	not during Ebola	not during Ebola	not during Ebola	Dry season birth	none	1st			-0.132438		not believe clinic trans	during Ebola	10	1.2	0	0	0	0	0	1	0
1320	1	15	Not born at facility	Bassa	Yes	24.5	6.24518	0.316456	0.625	14	NOT born in village	not during Ebola	not during Ebola	not during Ebola	not during Ebola	Dry season birth	Some Secondary or more	1st			0.0666712		Believes clinic trans or unsure	during Ebola	10	11	3.5	0	0	0	0	1	0
187	1	70	Born at facility	Bassa	Yes	32.8	6.24518	0.316456	0.486486	13	born in village	not during Ebola	not during Ebola	not during Ebola	not during Ebola	Rainy season birth	none	1st		1	-0.498228		not believe clinic trans	not during Ebola	10	11	11.8	0	1	0	0	1	0
595	1	4	Not born at facility	English	Yes	5.6	6.24518	0.316456	0.525	.i	born in village	not during Ebola	not during Ebola	not during Ebola	not during Ebola	Rainy season birth	none	2nd-3rd			-0.589147		Believes clinic trans or unsure	during Ebola	5.6	0	0	0	0	0	0	1	0
869	1	10	Born at facility	English	Yes	24.2	6.24518	0.316456	0.2625	26	born in village	not during Ebola	not during Ebola	not during Ebola	not during Ebola	Dry season birth	none	2nd-3rd	3	3	-0.749645	2013	Believes clinic trans or unsure	not during Ebola	10	11	3.2	1	1	1	1	1	1
1378	3	34	Born at facility	English	No	3.4	13.7235	0.151899	0.129231	17	born in village	not during Ebola	not during Ebola	not during Ebola	not during Ebola	Rainy season birth	Some Secondary or more	1st	1	1	0.333453	2011	Believes clinic trans or unsure	not during Ebola	3.4	0	0	1	1	0	0	1	1
1048	2	56	Not born at facility	English	No	8.6	4.20117	0.390625	0.709677	33	born in village	not during Ebola	not during Ebola	not during Ebola	not during Ebola	Rainy season birth	Some primary	2nd-3rd			-0.578937		not believe clinic trans	during Ebola	8.6	0	0	0	0	0	0	1	0
992	2	39	Not born at facility	Bassa	Yes	4.9	4.20117	0.390625	0.375	24	born in village	not during Ebola	not during Ebola	not during Ebola	not during Ebola	Rainy season birth	Some primary	2nd-3rd			-0.860736		Believes clinic trans or unsure	during Ebola	4.9	0	0	0	0	0	0	1	0
1154	1	4	Not born at facility	Bassa	No	5.6	6.24518	0.316456	0.525	21	NOT born in village	not during Ebola	not during Ebola	not during Ebola	not during Ebola	Dry season birth	none	1st			-0.477619		not believe clinic trans	during Ebola	5.6	0	0	0	0	0	0	1	0
762	2	23	Not born at facility	Bassa	Yes	5.6	4.20117	0.390625	0.583333	23	born in village	not during Ebola	not during Ebola	not during Ebola	not during Ebola	Dry season birth	Some primary	1st			-0.388519		Believes clinic trans or unsure	during Ebola	5.6	0	0	0	0	0	0	1	0
853	3	57	Born at facility	English	Yes	4.4	13.7235	0.151899	0.538462	19	born in village	not during Ebola	not during Ebola	not during Ebola	not during Ebola	Rainy season birth	none	2nd-3rd			-0.0765611		Believes clinic trans or unsure	during Ebola	4.4	0	0	0	0	0	0	1	0
1193	2	27	Not born at facility	Bassa	Yes	5.2	4.20117	0.390625	0.75	21	born in village	not during Ebola	not during Ebola	not during Ebola	not during Ebola	Rainy season birth	Some primary	2nd-3rd	1	1	0.0572302	2012	not believe clinic trans	not during Ebola	5.2	0	0	1	1	1	0	1	1
1415	2	32	Born at facility	Bassa	Yes	10.5	4.20117	0.390625	0.588235	17	born in village	not during Ebola	not during Ebola	not during Ebola	not during Ebola	Dry season birth	Some primary	1st	1	1	-0.634066	2013	Believes clinic trans or unsure	not during Ebola	10	0.5	0	1	1	1	1	1	1
879	2	61	Not born at facility	Bassa	No	11.6	4.20117	0.390625	0.809524	33	born in village	not during Ebola	not during Ebola	not during Ebola	not during Ebola	Dry season birth	none	1st			1.25253		Believes clinic trans or unsure	during Ebola	10	1.6	0	0	0	0	0	1	0
774	2	61	Not born at facility	Bassa	Yes	11.6	4.20117	0.390625	0.809524	34	born in village	not during Ebola	not during Ebola	not during Ebola	not during Ebola	Dry season birth	none	1st			0.370367		Believes clinic trans or unsure	during Ebola	10	1.6	0	0	0	0	0	1	0
627	3	57	Born at facility	English	No	4.4	13.7235	0.151899	0.538462	26	born in village	not during Ebola	not during Ebola	not during Ebola	not during Ebola	Dry season birth	none	2nd-3rd	3	3	-0.685364	2013	not believe clinic trans	not during Ebola	4.4	0	0	1	1	1	1	1	1
1359	2	37	Not born at facility	Bassa	Yes	6.9	4.20117	0.390625	0.807692	.i	born in village	not during Ebola	not during Ebola	not during Ebola	not during Ebola	Rainy season birth	none	4th or higher			-0.860736		not believe clinic trans	during Ebola	6.9	0	0	0	0	0	0	1	0
112	1	43	Not born at facility	Bassa	Yes	12.4	6.24518	0.316456	0.168	34	born in village	not during Ebola	not during Ebola	not during Ebola	not during Ebola	Rainy season birth	none	4th or higher	4	4	0.246942	2013	Believes clinic trans or unsure	not during Ebola	10	2.4	0	1	1	1	1	1	1
586	1	50	Born at facility	Bassa	Yes	6.1	6.24518	0.316456	0.4375	21	born in village	not during Ebola	not during Ebola	not during Ebola	not during Ebola	Rainy season birth	none	1st			-0.752947		not believe clinic trans	during Ebola	6.1	0	0	0	0	0	0	1	0
1141	2	64	Born at facility	English	Yes	7.2	4.20117	0.390625	0.333333	25	born in village	not during Ebola	not during Ebola	not during Ebola	not during Ebola	Rainy season birth	Some primary	2nd-3rd	2	2	-0.73	2011	not believe clinic trans	not during Ebola	7.2	0	0	1	1	1	0	1	1
1439	2	32	Born at facility	Bassa	Yes	9.6	4.20117	0.390625	0.588235	25	born in village	not during Ebola	not during Ebola	not during Ebola	not during Ebola	Rainy season birth	Some primary	4th or higher			-0.860736		Believes clinic trans or unsure	during Ebola	9.6	0	0	0	0	0	0	1	0
1371	2	19	Born at facility	Bassa	Yes	6.2	4.20117	0.390625	0.326316	17	born in village	not during Ebola	not during Ebola	not during Ebola	not during Ebola	Rainy season birth	Some Secondary or more	1st			-0.749645			during Ebola	6.2	0	0	0	0	0	0	1	0
453	3	46	Born at facility	English	No	0.1	13.7235	0.151899	0.07	14	born in village	not during Ebola	not during Ebola	not during Ebola	not during Ebola	Dry season birth	Some primary	1st			1.474		Believes clinic trans or unsure	during Ebola	0.1	0	0	0	0	0	0	1	0
556	2	58	Not born at facility	English	Yes	19.8	4.20117	0.390625	0.28	20	NOT born in village	not during Ebola	not during Ebola	not during Ebola	not during Ebola	Rainy season birth	Some Secondary or more	1st			-0.642671		Believes clinic trans or unsure	during Ebola	10	9.8	0	0	0	0	0	1	0
219	2	31	Not born at facility	Bassa	Yes	8.2	4.20117	0.390625	0.525	21	born in village	not during Ebola	not during Ebola	not during Ebola	not during Ebola	Rainy season birth	none	2nd-3rd			-0.0068402		Believes clinic trans or unsure	during Ebola	8.2	0	0	0	0	0	0	1	0
1152	1	16	Born at facility	Bassa	Yes	5.5	6.24518	0.316456	0.538462	19	born in village	not during Ebola	not during Ebola	not during Ebola	not during Ebola	Dry season birth	Some primary	4th or higher	1	1	-0.860736	2011	Believes clinic trans or unsure	not during Ebola	5.5	0	0	1	1	0	0	1	1
669	1	51	Not born at facility	Bassa	Yes	16.3	6.24518	0.316456	0.365385	28	born in village	not during Ebola	not during Ebola	not during Ebola	not during Ebola	Dry season birth	none	4th or higher			-0.127423		Believes clinic trans or unsure	during Ebola	10	6.3	0	0	0	0	0	1	0
1354	3	34	Not born at facility	English	Yes	3.4	13.7235	0.151899	0.129231	.i	born in village	not during Ebola	not during Ebola	not during Ebola	not during Ebola	Rainy season birth	none	2nd-3rd			3.90116		Believes clinic trans or unsure	during Ebola	3.4	0	0	0	0	0	0	1	0
1096	3	22	Born at facility	Bassa	Yes	0.1	13.7235	0.151899	0.084	25	born in village	not during Ebola	not during Ebola	not during Ebola	not during Ebola	Dry season birth	Some primary	4th or higher			-0.1651		Believes clinic trans or unsure	during Ebola	0.1	0	0	0	0	0	0	1	0
113	1	66	Not born at facility	English	Yes	17.7	6.24518	0.316456	0.653846	27	born in village	not during Ebola	not during Ebola	not during Ebola	not during Ebola	Rainy season birth	none	2nd-3rd			-0.651231		Believes clinic trans or unsure	during Ebola	10	7.7	0	0	0	0	0	1	0
397	1	65	Not born at facility	English	Yes	5.4	6.24518	0.316456	0.782609	33	born in village	not during Ebola	not during Ebola	not during Ebola	during Ebola	Rainy season birth	none	2nd-3rd	4	4	-0.424268	2013	not believe clinic trans	not during Ebola	5.4	0	0	1	1	1	1	1	1
99	2	30	Born at facility	Bassa	Yes	7.5	4.20117	0.390625	0.85	22	born in village	not during Ebola	not during Ebola	not during Ebola	not during Ebola	Dry season birth	Some primary	2nd-3rd	2	2	-0.860736	2013	Believes clinic trans or unsure	not during Ebola	7.5	0	0	1	1	1	1	1	1
830	1	65	Born at facility	Bassa	Yes	5.2	6.24518	0.316456	0.782609	29	born in village	not during Ebola	not during Ebola	not during Ebola	not during Ebola	Rainy season birth	none	4th or higher			-0.860736		not believe clinic trans	during Ebola	5.2	0	0	0	0	0	0	1	0
439	2	27	Not born at facility	Bassa	Yes	5.2	4.20117	0.390625	0.75	15	born in village	not during Ebola	not during Ebola	not during Ebola	not during Ebola	Rainy season birth	none	2nd-3rd			-0.201197		not believe clinic trans	during Ebola	5.2	0	0	0	0	0	0	1	0
474	2	28	Born at facility	Bassa	Yes	8.3	4.20117	0.390625	0.411765	35	born in village	not during Ebola	not during Ebola	not during Ebola	not during Ebola	Rainy season birth	Some Secondary or more	4th or higher	4	4	1.87272	2011	Believes clinic trans or unsure	not during Ebola	8.3	0	0	1	1	0	0	1	1
1376	2	20	Born at facility	English	Yes	6.2	4.20117	0.390625	0.326316	19	born in village	not during Ebola	not during Ebola	not during Ebola	not during Ebola	Dry season birth	none	1st			0.787353		Believes clinic trans or unsure	during Ebola	6.2	0	0	0	0	0	0	1	0
783	1	45	Not born at facility	Bassa	No	20.9	6.24518	0.316456	0.333333	32	born in village	not during Ebola	not during Ebola	not during Ebola	not during Ebola	Rainy season birth	none	1st	4	4	-0.73	2011	not believe clinic trans	not during Ebola	10	10.9	0	1	1	0	0	1	1
1377	3	34	Born at facility	Bassa	No	3.4	13.7235	0.151899	0.129231	28	born in village	not during Ebola	not during Ebola	not during Ebola	not during Ebola	Dry season birth	Some primary	4th or higher	3	3	0.58858	2013	not believe clinic trans	not during Ebola	3.4	0	0	1	1	1	1	1	1
278	1	69	Not born at facility	Bassa	Yes	15.6	6.24518	0.316456	0.590909	26	born in village	not during Ebola	not during Ebola	not during Ebola	not during Ebola	Dry season birth	none	2nd-3rd			-0.73		not believe clinic trans	during Ebola	10	5.6	0	0	0	0	0	1	0
1439	2	32	Born at facility	Bassa	Yes	9.6	4.20117	0.390625	0.588235	21	born in village	not during Ebola	not during Ebola	not during Ebola	not during Ebola	Dry season birth	Some primary	2nd-3rd			-0.860736		Believes clinic trans or unsure	during Ebola	9.6	0	0	0	0	0	0	1	0
1281	2	41	Not born at facility	Bassa	Yes	9.4	4.20117	0.390625	0.913044	.i	born in village	not during Ebola	not during Ebola	not during Ebola	not during Ebola	Dry season birth	none	1st			-0.180933		Believes clinic trans or unsure	during Ebola	9.4	0	0	0	0	0	0	1	0
1426	2	32	Born at facility	Bassa	Yes	9.6	4.20117	0.390625	0.588235	40	born in village	not during Ebola	not during Ebola	not during Ebola	not during Ebola	Dry season birth	none	4th or higher	4	4	-0.860736		not believe clinic trans	not during Ebola	9.6	0	0	1	1	0	0	1	1
203	3	68	Born at facility	English	Yes	0.1	13.7235	0.151899	0.145833	28	NOT born in village	not during Ebola	not during Ebola	not during Ebola	not during Ebola	Rainy season birth	none	2nd-3rd			1.32309		not believe clinic trans	during Ebola	0.1	0	0	0	0	0	0	1	0
79	3	68	Not born at facility	English	Yes	0.1	13.7235	0.151899	0.145833	.i	born in village	not during Ebola	not during Ebola	not during Ebola	not during Ebola	Rainy season birth	none	2nd-3rd			-0.354093		Believes clinic trans or unsure	during Ebola	0.1	0	0	0	0	0	0	1	0
1178	3	25	Born at facility	English	Yes	0.1	13.7235	0.151899	0.212121	28	born in village	not during Ebola	not during Ebola	not during Ebola	not during Ebola	Dry season birth	Some primary	2nd-3rd			0.059857		not believe clinic trans	during Ebola	0.1	0	0	0	0	0	0	1	0
396	1	10	Born at facility	English	Yes	24.2	6.24518	0.316456	0.2625	20	NOT born in village	not during Ebola	not during Ebola	not during Ebola	not during Ebola	Rainy season birth	none	1st			-0.608792		Believes clinic trans or unsure	during Ebola	10	11	3.2	0	0	0	0	1	0
418	2	54	Not born at facility	Bassa	Yes	13.7	4.20117	0.390625	0.7	25	born in village	not during Ebola	not during Ebola	not during Ebola	not during Ebola	Dry season birth	none	1st	2	2	-0.487735	2013	not believe clinic trans	not during Ebola	10	3.7	0	1	1	1	1	1	1
1235	2	19	Born at facility	English	Yes	6.2	4.20117	0.390625	0.326316	36	born in village	not during Ebola	not during Ebola	not during Ebola	not during Ebola	Dry season birth	Some primary	1st			0.0327253		not believe clinic trans	during Ebola	6.2	0	0	0	0	0	0	1	0
1410	1	44	Not born at facility	Bassa	No	12.4	6.24518	0.316456	0.168	22	born in village	not during Ebola	not during Ebola	not during Ebola	not during Ebola	Dry season birth	none	1st			0.337411		Believes clinic trans or unsure	during Ebola	10	2.4	0	0	0	0	0	1	0
739	3	62	Born at facility	Bassa	Yes	2	13.7235	0.151899	0.238636	35	born in village	not during Ebola	not during Ebola	not during Ebola	not during Ebola	Dry season birth	none	4th or higher			-0.147545		not believe clinic trans	not during Ebola	2	0	0	0	0	0	0	1	0
525	1	50	Born at facility	Bassa	Yes	6.1	6.24518	0.316456	0.4375	26	born in village	not during Ebola	not during Ebola	not during Ebola	not during Ebola	Dry season birth	none	2nd-3rd			-0.719883		not believe clinic trans	during Ebola	6.1	0	0	0	0	0	0	1	0
1091	3	25	Not born at facility	Bassa	Yes	0.1	13.7235	0.151899	0.212121	20	born in village	not during Ebola	not during Ebola	not during Ebola	not during Ebola	Rainy season birth	none	1st			-0.316447		not believe clinic trans	during Ebola	0.1	0	0	0	0	0	0	1	0
853	3	57	Born at facility	English	Yes	4.4	13.7235	0.151899	0.538462	31	born in village	not during Ebola	not during Ebola	not during Ebola	not during Ebola	Dry season birth	none	4th or higher			-0.0765611		Believes clinic trans or unsure	during Ebola	4.4	0	0	0	0	0	0	1	0
856	2	24	Born at facility	Bassa	Yes	6.7	4.20117	0.390625	0.59375	20	born in village	not during Ebola	not during Ebola	not during Ebola	not during Ebola	Rainy season birth	Some primary	4th or higher	1	1	-0.363669	2011	not believe clinic trans	not during Ebola	6.7	0	0	1	1	0	0	1	1
77	3	22	Born at facility	Bassa	Yes	0.1	13.7235	0.151899	0.084	16	born in village	not during Ebola	not during Ebola	not during Ebola	not during Ebola	Dry season birth	Some Secondary or more	1st			0.329337		Believes clinic trans or unsure	during Ebola	0.1	0	0	0	0	0	0	1	0
1384	2	37	Not born at facility	Bassa	Yes	6.9	4.20117	0.390625	0.807692	17	born in village	not during Ebola	not during Ebola	not during Ebola	not during Ebola	Dry season birth	none	4th or higher			-0.860736		Believes clinic trans or unsure	during Ebola	6.9	0	0	0	0	0	0	1	0
117	1	10	Born at facility	English	Yes	24.2	6.24518	0.316456	0.2625	33	NOT born in village	not during Ebola	not during Ebola	not during Ebola	not during Ebola	Dry season birth	Some primary	1st	4	4	-0.643218	2013	Believes clinic trans or unsure	not during Ebola	10	11	3.2	1	1	1	1	1	1
11	2	60	Born at facility	Bassa	Yes	5.6	4.20117	0.390625	0.28	34	born in village	not during Ebola	not during Ebola	not during Ebola	not during Ebola	Rainy season birth	none	1st		4	0.358927		Believes clinic trans or unsure	not during Ebola	5.6	0	0	0	1	0	0	1	0
8	2	39	Not born at facility	Bassa	Yes	4.9	4.20117	0.390625	0.375	42	born in village	not during Ebola	not during Ebola	not during Ebola	not during Ebola	Dry season birth	none	1st			-0.43669		Believes clinic trans or unsure	not during Ebola	4.9	0	0	0	0	0	0	1	0
1401	3	34	Born at facility	Bassa	No	3.4	13.7235	0.151899	0.129231	21	born in village	not during Ebola	not during Ebola	not during Ebola	not during Ebola	Dry season birth	Some primary	1st	1	1	0.723296	2011	not believe clinic trans	not during Ebola	3.4	0	0	1	1	1	0	1	1
536	1	51	Not born at facility	Bassa	Yes	16.3	6.24518	0.316456	0.365385	29	born in village	not during Ebola	not during Ebola	not during Ebola	not during Ebola	Dry season birth	none	2nd-3rd	3	3	-0.860736	2011	not believe clinic trans	not during Ebola	10	6.3	0	1	1	0	0	1	1
41	3	62	Not born at facility	English	Yes	2	13.7235	0.151899	0.238636	13	born in village	not during Ebola	not during Ebola	not during Ebola	not during Ebola	Rainy season birth	Some primary	2nd-3rd			-0.201197		Believes clinic trans or unsure	during Ebola	2	0	0	0	0	0	0	1	0
229	2	55	Born at facility	Bassa	Yes	18.4	4.20117	0.390625	0.565217	20	born in village	not during Ebola	not during Ebola	not during Ebola	not during Ebola	Rainy season birth	Some primary	1st			-0.740493		not believe clinic trans	during Ebola	10	8.4	0	0	0	0	0	1	0
752	2	28	Born at facility	Bassa	Yes	8.3	4.20117	0.390625	0.411765	20	born in village	not during Ebola	not during Ebola	not during Ebola	not during Ebola	Dry season birth	Some primary	2nd-3rd	1	1	0.64459	2011	not believe clinic trans	not during Ebola	8.3	0	0	1	1	0	0	1	1
1377	3	34	Born at facility	Bassa	No	3.4	13.7235	0.151899	0.129231	22	born in village	not during Ebola	not during Ebola	not during Ebola	not during Ebola	Dry season birth	Some primary	2nd-3rd			0.58858		not believe clinic trans	during Ebola	3.4	0	0	0	0	0	0	1	0
580	2	28	Born at facility	English	No	8.3	4.20117	0.390625	0.411765	20	NOT born in village	not during Ebola	not during Ebola	not during Ebola	not during Ebola	Rainy season birth	Some primary	1st			1.33239		Believes clinic trans or unsure	during Ebola	8.3	0	0	0	0	0	0	1	0
483	2	24	Not born at facility	Bassa	Yes	6.7	4.20117	0.390625	0.59375	25	born in village	not during Ebola	not during Ebola	not during Ebola	not during Ebola	Dry season birth	Some primary	2nd-3rd			-0.364209		Believes clinic trans or unsure	during Ebola	6.7	0	0	0	0	0	0	1	0
28	1	45	Born at facility	English	No	20.9	6.24518	0.316456	0.333333	26	born in village	not during Ebola	not during Ebola	not during Ebola	not during Ebola	Dry season birth	none	4th or higher	3	3	-0.685364	2011	Believes clinic trans or unsure	not during Ebola	10	10.9	0	1	1	0	0	1	1
991	3	17	Born at facility	English	No	0.1	13.7235	0.151899	0.196262	17	born in village	not during Ebola	not during Ebola	not during Ebola	not during Ebola	Rainy season birth	Some primary	1st	1	1	-0.257912	2013	not believe clinic trans	not during Ebola	0.1	0	0	1	1	1	1	1	1
658	3	22	Born at facility	English	No	0.1	13.7235	0.151899	0.084	26	NOT born in village	not during Ebola	not during Ebola	not during Ebola	not during Ebola	Dry season birth	none	1st			-0.369107		not believe clinic trans	during Ebola	0.1	0	0	0	0	0	0	1	0
848	1	51	Not born at facility	English	Yes	16.3	6.24518	0.316456	0.365385	24	born in village	not during Ebola	not during Ebola	not during Ebola	not during Ebola	Dry season birth	none	4th or higher			0.288687		Believes clinic trans or unsure	during Ebola	10	6.3	0	0	0	0	0	1	0
1071	1	7	Not born at facility	Bassa	No	16.1	6.24518	0.316456	0.4	22	born in village	not during Ebola	not during Ebola	not during Ebola	not during Ebola	Dry season birth	Some Secondary or more	2nd-3rd			-0.689267		Believes clinic trans or unsure	during Ebola	10	6.1	0	0	0	0	0	1	0
57	1	11	Born at facility	English	Yes	16	6.24518	0.316456	0.2	28	NOT born in village	not during Ebola	not during Ebola	not during Ebola	not during Ebola	Rainy season birth	none	1st			1.25084		Believes clinic trans or unsure	during Ebola	10	6	0	0	0	0	0	1	0
1295	3	34	Born at facility	English	Yes	3.4	13.7235	0.151899	0.129231	21	born in village	not during Ebola	not during Ebola	not during Ebola	not during Ebola	Dry season birth	Some primary	1st	1	1	1.87613	2011	not believe clinic trans	not during Ebola	3.4	0	0	1	1	0	0	1	1
1145	3	40	Born at facility	Bassa	Yes	0.1	13.7235	0.151899	0.308823	36	born in village	not during Ebola	not during Ebola	not during Ebola	not during Ebola	Dry season birth	none	4th or higher		4	-0.181971		not believe clinic trans	not during Ebola	0.1	0	0	0	1	0	0	1	0
458	2	26	Not born at facility	Bassa	No	11.2	4.20117	0.390625	0.636364	16	born in village	not during Ebola	not during Ebola	not during Ebola	not during Ebola	Dry season birth	none	2nd-3rd			-0.132438		not believe clinic trans	during Ebola	10	1.2	0	0	0	0	0	1	0
618	1	18	Not born at facility	Bassa	Yes	9.6	6.24518	0.316456	1	17	NOT born in village	not during Ebola	not during Ebola	not during Ebola	not during Ebola	Dry season birth	Some primary	1st			-0.75431		Believes clinic trans or unsure	during Ebola	9.6	0	0	0	0	0	0	1	0
791	1	43	Born at facility	Bassa	No	12.4	6.24518	0.316456	0.168	25	born in village	not during Ebola	not during Ebola	not during Ebola	not during Ebola	Dry season birth	none	4th or higher			-0.374702		Believes clinic trans or unsure	during Ebola	10	2.4	0	0	0	0	0	1	0
415	3	68	Born at facility	English	Yes	0.1	13.7235	0.151899	0.145833	31	born in village	not during Ebola	not during Ebola	not during Ebola	not during Ebola	Dry season birth	Some Secondary or more	4th or higher			2.35438		Believes clinic trans or unsure	during Ebola	0.1	0	0	0	0	0	0	1	0
857	3	25	Born at facility	Bassa	No	0.1	13.7235	0.151899	0.212121	35	born in village	not during Ebola	not during Ebola	not during Ebola	not during Ebola	Dry season birth	none	2nd-3rd			-0.0828295		not believe clinic trans	during Ebola	0.1	0	0	0	0	0	0	1	0
421	3	68	Born at facility	English	Yes	0.1	13.7235	0.151899	0.145833	19	born in village	not during Ebola	not during Ebola	not during Ebola	not during Ebola	Rainy season birth	Some primary	1st			-0.371961		Believes clinic trans or unsure	during Ebola	0.1	0	0	0	0	0	0	1	0
922	2	59	Born at facility	English	Yes	5.5	4.20117	0.390625	0.65625	20	born in village	not during Ebola	not during Ebola	not during Ebola	not during Ebola	Dry season birth	none	2nd-3rd	1	1	1.56711	2013	not believe clinic trans	not during Ebola	5.5	0	0	1	1	1	1	1	1
1354	3	34	Not born at facility	English	Yes	3.4	13.7235	0.151899	0.129231	.i	born in village	not during Ebola	not during Ebola	not during Ebola	not during Ebola	Rainy season birth	none	1st			3.90116		Believes clinic trans or unsure	during Ebola	3.4	0	0	0	0	0	0	1	0
1096	3	22	Not born at facility	Bassa	Yes	0.1	13.7235	0.151899	0.084	20	born in village	not during Ebola	not during Ebola	not during Ebola	not during Ebola	Dry season birth	Some primary	2nd-3rd			-0.1651		Believes clinic trans or unsure	during Ebola	0.1	0	0	0	0	0	0	1	0
17	3	25	Born at facility	Bassa	Yes	0.1	13.7235	0.151899	0.212121	38	born in village	not during Ebola	not during Ebola	not during Ebola	not during Ebola	Rainy season birth	none	1st			-0.143595		not believe clinic trans	during Ebola	0.1	0	0	0	0	0	0	1	0
1076	1	47	Born at facility	Bassa	Yes	8	6.24518	0.316456	0.328125	35	born in village	not during Ebola	not during Ebola	not during Ebola	not during Ebola	Dry season birth	none	4th or higher			-0.108128		Believes clinic trans or unsure	during Ebola	8	0	0	0	0	0	0	1	0
72	1	67	Born at facility	English	Yes	5.6	6.24518	0.316456	0.416667	29	born in village	not during Ebola	not during Ebola	not during Ebola	not during Ebola	Dry season birth	Some primary	1st			0.214327		not believe clinic trans	during Ebola	5.6	0	0	0	0	0	0	1	0
669	1	51	Born at facility	Bassa	Yes	16.3	6.24518	0.316456	0.365385	39	born in village	not during Ebola	not during Ebola	not during Ebola	not during Ebola	Dry season birth	none	4th or higher	4	4	-0.127423	2012	Believes clinic trans or unsure	not during Ebola	10	6.3	0	1	1	1	0	1	1
892	1	9	Born at facility	English	No	5.2	6.24518	0.316456	0.913044	22	born in village	not during Ebola	not during Ebola	not during Ebola	not during Ebola	Rainy season birth	none	1st			-0.50333		not believe clinic trans	during Ebola	5.2	0	0	0	0	0	0	1	0
1175	1	12	Born at facility	English	Yes	19.1	6.24518	0.316456	0.207237	24	NOT born in village	not during Ebola	not during Ebola	not during Ebola	not during Ebola	Dry season birth	Some primary	1st	2	2	0.0852576	2011	Believes clinic trans or unsure	not during Ebola	10	9.1	0	1	1	1	0	1	1
103	3	52	Born at facility	English	No	0.1	13.7235	0.151899	0.0771605	24	born in village	not during Ebola	not during Ebola	not during Ebola	not during Ebola	Dry season birth	Some primary	1st	2	2	-0.338759	2012		not during Ebola	0.1	0	0	1	1	1	0	1	1
435	1	49	Not born at facility	English	Yes	16.9	6.24518	0.316456	0.714286	24	born in village	not during Ebola	not during Ebola	not during Ebola	not during Ebola	Dry season birth	none	2nd-3rd			-0.860736		Believes clinic trans or unsure	during Ebola	10	6.9	0	0	0	0	0	1	0
722	1	47	Not born at facility	Bassa	No	8	6.24518	0.316456	0.328125	28	born in village	not during Ebola	not during Ebola	not during Ebola	not during Ebola	Dry season birth	Some primary	1st	3	3	-0.860736	2013	not believe clinic trans	not during Ebola	8	0	0	1	1	1	1	1	1
1346	1	15	Not born at facility	Bassa	Yes	24.5	6.24518	0.316456	0.625	22	born in village	not during Ebola	not during Ebola	not during Ebola	not during Ebola	Rainy season birth	none	4th or higher			-0.333065		Believes clinic trans or unsure	during Ebola	10	11	3.5	0	0	0	0	1	0
586	1	50	Born at facility	Bassa	Yes	6.1	6.24518	0.316456	0.4375	20	born in village	not during Ebola	not during Ebola	not during Ebola	not during Ebola	Rainy season birth	none	2nd-3rd			-0.752947		not believe clinic trans	during Ebola	6.1	0	0	0	0	0	0	1	0
1130	1	67	Born at facility	English	Yes	5.6	6.24518	0.316456	0.416667	23	born in village	not during Ebola	not during Ebola	not during Ebola	not during Ebola	Rainy season birth	Some primary	1st			-0.117163		not believe clinic trans	during Ebola	5.6	0	0	0	0	0	0	1	0
1127	3	52	Not born at facility	English	Yes	0.1	13.7235	0.151899	0.0771605	21	born in village	not during Ebola	not during Ebola	not during Ebola	not during Ebola	Dry season birth	Some Secondary or more	2nd-3rd			2.55337		Believes clinic trans or unsure	during Ebola	0.1	0	0	0	0	0	0	1	0
613	1	6	Born at facility	English	Yes	10.9	6.24518	0.316456	0.287671	18	NOT born in village	not during Ebola	not during Ebola	not during Ebola	not during Ebola	Dry season birth	Some primary	1st		1	0.149298		Believes clinic trans or unsure	not during Ebola	10	0.9	0	0	1	0	0	1	0
179	2	29	Not born at facility	Bassa	Yes	19.6	4.20117	0.390625	0.62069	13	born in village	not during Ebola	not during Ebola	not during Ebola	not during Ebola	Dry season birth	Some primary	1st			-0.752947		Believes clinic trans or unsure	during Ebola	10	9.6	0	0	0	0	0	1	0
203	3	68	Born at facility	English	Yes	0.1	13.7235	0.151899	0.145833	31	NOT born in village	not during Ebola	not during Ebola	not during Ebola	not during Ebola	Rainy season birth	none	4th or higher			1.32309		not believe clinic trans	during Ebola	0.1	0	0	0	0	0	0	1	0
1174	2	54	Born at facility	English	No	5.4	4.20117	0.390625	0.7	23	NOT born in village	not during Ebola	not during Ebola	not during Ebola	during Ebola	Rainy season birth	Some Secondary or more	1st	2	2	2.03721	2013	Believes clinic trans or unsure	not during Ebola	5.4	0	0	1	1	1	1	1	1
879	2	61	Born at facility	Bassa	Yes	11.6	4.20117	0.390625	0.809524	42	born in village	not during Ebola	not during Ebola	not during Ebola	not during Ebola	Dry season birth	none	1st			1.25253		Believes clinic trans or unsure	during Ebola	10	1.6	0	0	0	0	0	1	0
590	1	8	Born at facility	Bassa	No	8.4	6.24518	0.316456	0.35	20	born in village	not during Ebola	not during Ebola	not during Ebola	not during Ebola	Rainy season birth	none	1st			0.0224782		Believes clinic trans or unsure	during Ebola	8.4	0	0	0	0	0	0	1	0
755	3	25	Not born at facility	English	Yes	0.1	13.7235	0.151899	0.212121	21	NOT born in village	not during Ebola	not during Ebola	not during Ebola	not during Ebola	Rainy season birth	Some Secondary or more	2nd-3rd			-0.0033166		Believes clinic trans or unsure	during Ebola	0.1	0	0	0	0	0	0	1	0
299	3	40	Born at facility	Bassa	Yes	0.1	13.7235	0.151899	0.308823	21	born in village	not during Ebola	not during Ebola	not during Ebola	not during Ebola	Dry season birth	none	1st			-0.226183		Believes clinic trans or unsure	during Ebola	0.1	0	0	0	0	0	0	1	0
197	2	55	Born at facility	Bassa	Yes	18.4	4.20117	0.390625	0.565217	18	born in village	not during Ebola	not during Ebola	not during Ebola	not during Ebola	Dry season birth	Some primary	4th or higher			-0.130861		not believe clinic trans	during Ebola	10	8.4	0	0	0	0	0	1	0
630	1	4	Born at facility	English	No	5.6	6.24518	0.316456	0.525	17	NOT born in village	not during Ebola	not during Ebola	not during Ebola	not during Ebola	Rainy season birth	Some primary	1st	1	1	-0.309486	2013	Believes clinic trans or unsure	not during Ebola	5.6	0	0	1	1	1	1	1	1
483	2	24	Born at facility	Bassa	Yes	6.7	4.20117	0.390625	0.59375	27	born in village	not during Ebola	not during Ebola	not during Ebola	not during Ebola	Rainy season birth	Some primary	4th or higher			-0.364209		Believes clinic trans or unsure	during Ebola	6.7	0	0	0	0	0	0	1	0
839	3	53	Born at facility	English	Yes	0.1	13.7235	0.151899	0.0771605	19	born in village	not during Ebola	not during Ebola	not during Ebola	not during Ebola	Dry season birth	Some primary	1st			1.53353		not believe clinic trans	during Ebola	0.1	0	0	0	0	0	0	1	0
152	2	63	Born at facility	Bassa	Yes	10	4.20117	0.390625	0.48	28	born in village	not during Ebola	not during Ebola	not during Ebola	not during Ebola	Dry season birth	none	1st		3	-0.282374		not believe clinic trans	not during Ebola	10	0	0	0	1	0	0	1	0
338	3	68	Born at facility	English	No	0.1	13.7235	0.151899	0.145833	21	born in village	not during Ebola	not during Ebola	not during Ebola	not during Ebola	Rainy season birth	none	1st	1	1	-0.685364	2013	not believe clinic trans	not during Ebola	0.1	0	0	1	1	1	1	1	1
781	2	60	Born at facility	Bassa	Yes	5.6	4.20117	0.390625	0.28	28	born in village	not during Ebola	not during Ebola	not during Ebola	not during Ebola	Rainy season birth	none	4th or higher	3	3	-0.608792	2013	Believes clinic trans or unsure	not during Ebola	5.6	0	0	1	1	1	1	1	1
197	2	55	Born at facility	Bassa	Yes	18.4	4.20117	0.390625	0.565217	15	born in village	not during Ebola	not during Ebola	not during Ebola	not during Ebola	Dry season birth	Some primary	4th or higher			-0.130861		not believe clinic trans	during Ebola	10	8.4	0	0	0	0	0	1	0
375	3	53	Born at facility	English	No	0.1	13.7235	0.151899	0.0771605	27	NOT born in village	not during Ebola	not during Ebola	not during Ebola	not during Ebola	Dry season birth	Some Secondary or more	2nd-3rd	3	3	3.35173	2013		not during Ebola	0.1	0	0	1	1	1	1	1	1
729	3	17	Not born at facility	English	Yes	0.1	13.7235	0.151899	0.196262	20	NOT born in village	not during Ebola	not during Ebola	not during Ebola	not during Ebola	Rainy season birth	none	1st			-0.0553714		Believes clinic trans or unsure	during Ebola	0.1	0	0	0	0	0	0	1	0
370	1	10	Not born at facility	English	Yes	24.2	6.24518	0.316456	0.2625	29	NOT born in village	not during Ebola	not during Ebola	not during Ebola	not during Ebola	Dry season birth	Some primary	2nd-3rd			-0.115547		Believes clinic trans or unsure	during Ebola	10	11	3.2	0	0	0	0	1	0
870	1	43	Not born at facility	Bassa	Yes	12.4	6.24518	0.316456	0.168	32	born in village	not during Ebola	not during Ebola	not during Ebola	not during Ebola	Dry season birth	none	4th or higher			0.246817		Believes clinic trans or unsure	during Ebola	10	2.4	0	0	0	0	0	1	0
70	1	6	Not born at facility	Bassa	Yes	10.9	6.24518	0.316456	0.287671	25	born in village	not during Ebola	not during Ebola	not during Ebola	not during Ebola	Dry season birth	none	1st			-0.0980113		not believe clinic trans	during Ebola	10	0.9	0	0	0	0	0	1	0
786	1	10	Born at facility	English	Yes	24.2	6.24518	0.316456	0.2625	23	NOT born in village	not during Ebola	not during Ebola	not during Ebola	not during Ebola	Rainy season birth	none	2nd-3rd			-0.23579		Believes clinic trans or unsure	during Ebola	10	11	3.2	0	0	0	0	1	0
1227	2	19	Not born at facility	Bassa	Yes	6.2	4.20117	0.390625	0.326316	19	born in village	not during Ebola	not during Ebola	not during Ebola	not during Ebola	Rainy season birth	Some primary	1st			0.816731		Believes clinic trans or unsure	during Ebola	6.2	0	0	0	0	0	0	1	0
1037	1	8	Born at facility	Bassa	Yes	8.4	6.24518	0.316456	0.35	33	born in village	not during Ebola	not during Ebola	not during Ebola	not during Ebola	Dry season birth	none	1st			-0.161362		Believes clinic trans or unsure	during Ebola	8.4	0	0	0	0	0	0	1	0
1321	2	21	Born at facility	Bassa	Yes	6.2	4.20117	0.390625	0.326316	19	born in village	not during Ebola	not during Ebola	not during Ebola	not during Ebola	Rainy season birth	none	4th or higher			0.0958707		not believe clinic trans	during Ebola	6.2	0	0	0	0	0	0	1	0
114	2	56	Born at facility	English	Yes	8.6	4.20117	0.390625	0.709677	15	born in village	not during Ebola	not during Ebola	not during Ebola	not during Ebola	Dry season birth	Some primary	1st	1	1	-0.277905	2011	not believe clinic trans	not during Ebola	8.6	0	0	1	1	0	0	1	1
39	1	9	Not born at facility	English	Yes	5.2	6.24518	0.316456	0.913044	18	born in village	not during Ebola	not during Ebola	not during Ebola	not during Ebola	Rainy season birth	none	1st			-0.860736		Believes clinic trans or unsure	during Ebola	5.2	0	0	0	0	0	0	1	0
780	1	13	Not born at facility	English	Yes	19.1	6.24518	0.316456	0.207237	18	NOT born in village	not during Ebola	not during Ebola	not during Ebola	not during Ebola	Rainy season birth	Some Secondary or more	2nd-3rd			3.01045		not believe clinic trans	during Ebola	10	9.1	0	0	0	0	0	1	0
828	1	47	Not born at facility	English	Yes	8	6.24518	0.316456	0.328125	16	born in village	not during Ebola	not during Ebola	not during Ebola	not during Ebola	Rainy season birth	Some primary	1st			-0.169638		Believes clinic trans or unsure	during Ebola	8	0	0	0	0	0	0	1	0
553	3	17	Not born at facility	English	No	0.1	13.7235	0.151899	0.196262	25	born in village	not during Ebola	not during Ebola	not during Ebola	not during Ebola	Dry season birth	Some primary	2nd-3rd			-0.100371		Believes clinic trans or unsure	during Ebola	0.1	0	0	0	0	0	0	1	0
765	1	70	Not born at facility	Bassa	Yes	32.8	6.24518	0.316456	0.486486	.i	born in village	not during Ebola	not during Ebola	not during Ebola	not during Ebola	Dry season birth	none	1st			-0.487735		Believes clinic trans or unsure	during Ebola	10	11	11.8	0	0	0	0	1	0
421	3	68	Not born at facility	English	Yes	0.1	13.7235	0.151899	0.145833	22	born in village	not during Ebola	not during Ebola	not during Ebola	not during Ebola	Dry season birth	Some primary	2nd-3rd	2	2	-0.371961	2011	Believes clinic trans or unsure	not during Ebola	0.1	0	0	1	1	0	0	1	1
1339	3	42	Not born at facility	Bassa	Yes	4.2	13.7235	0.151899	0.55	25	born in village	not during Ebola	not during Ebola	not during Ebola	not during Ebola	Rainy season birth	none	4th or higher			0.302165		Believes clinic trans or unsure	during Ebola	4.2	0	0	0	0	0	0	1	0
985	1	1	Born at facility	English	Yes	20.5	6.24518	0.316456	0.232558	22	NOT born in village	not during Ebola	not during Ebola	not during Ebola	not during Ebola	Dry season birth	none	1st			2.85566		Believes clinic trans or unsure	during Ebola	10	10.5	0	0	0	0	0	1	0
637	1	6	Born at facility	English	Yes	10.9	6.24518	0.316456	0.287671	23	born in village	not during Ebola	not during Ebola	not during Ebola	not during Ebola	Dry season birth	Some primary	2nd-3rd			0.270085		Believes clinic trans or unsure	during Ebola	10	0.9	0	0	0	0	0	1	0
713	1	67	Not born at facility	Bassa	Yes	5.6	6.24518	0.316456	0.416667	19	born in village	not during Ebola	not during Ebola	not during Ebola	not during Ebola	Rainy season birth	Some Secondary or more	1st			-0.117279		not believe clinic trans	during Ebola	5.6	0	0	0	0	0	0	1	0
119	2	63	Born at facility	Bassa	Yes	10	4.20117	0.390625	0.48	24	born in village	not during Ebola	not during Ebola	not during Ebola	not during Ebola	Dry season birth	none	1st			-0.494946		Believes clinic trans or unsure	not during Ebola	10	0	0	0	0	0	0	1	0
1289	2	21	Born at facility	English	Yes	6.2	4.20117	0.390625	0.326316	28	born in village	not during Ebola	not during Ebola	not during Ebola	not during Ebola	Dry season birth	Some primary	4th or higher	3	3	1.01536	2013	Believes clinic trans or unsure	not during Ebola	6.2	0	0	1	1	1	1	1	1
1141	2	64	Born at facility	English	Yes	7.2	4.20117	0.390625	0.333333	27	born in village	not during Ebola	not during Ebola	not during Ebola	not during Ebola	Rainy season birth	Some primary	4th or higher	3	3	-0.73	2013	not believe clinic trans	not during Ebola	7.2	0	0	1	1	1	1	1	1
507	1	7	Born at facility	Bassa	Yes	17.1	6.24518	0.316456	0.4	.i	NOT born in village	not during Ebola	not during Ebola	not during Ebola	not during Ebola	Rainy season birth	none	1st			-0.613651		Believes clinic trans or unsure	during Ebola	10	7.1	0	0	0	0	0	1	0
1127	3	52	Born at facility	English	Yes	0.1	13.7235	0.151899	0.0771605	34	born in village	not during Ebola	not during Ebola	not during Ebola	not during Ebola	Dry season birth	Some Secondary or more	4th or higher	4	4	2.55337	2012	Believes clinic trans or unsure	not during Ebola	0.1	0	0	1	1	1	0	1	1
1077	1	9	Born at facility	Bassa	Yes	5.2	6.24518	0.316456	0.913044	16	born in village	not during Ebola	not during Ebola	not during Ebola	not during Ebola	Rainy season birth	none	4th or higher			-0.73		Believes clinic trans or unsure	during Ebola	5.2	0	0	0	0	0	0	1	0
1346	1	15	Not born at facility	Bassa	Yes	24.5	6.24518	0.316456	0.625	23	born in village	not during Ebola	not during Ebola	not during Ebola	not during Ebola	Rainy season birth	none	4th or higher			-0.333065		Believes clinic trans or unsure	during Ebola	10	11	3.5	0	0	0	0	1	0
826	2	58	Not born at facility	Bassa	Yes	19.8	4.20117	0.390625	0.28	33	born in village	not during Ebola	not during Ebola	not during Ebola	not during Ebola	Dry season birth	none	1st			-0.50333		not believe clinic trans	during Ebola	10	9.8	0	0	0	0	0	1	0
529	2	30	Not born at facility	Bassa	Yes	7.5	4.20117	0.390625	0.85	36	born in village	not during Ebola	not during Ebola	not during Ebola	not during Ebola	Rainy season birth	none	2nd-3rd			-0.860736		not believe clinic trans	during Ebola	7.5	0	0	0	0	0	0	1	0
459	1	65	Not born at facility	Bassa	Yes	5.4	6.24518	0.316456	0.782609	22	born in village	not during Ebola	not during Ebola	not during Ebola	not during Ebola	Dry season birth	none	1st			-0.613457			during Ebola	5.4	0	0	0	0	0	0	1	0
905	2	24	Born at facility	English	No	6.7	4.20117	0.390625	0.59375	16	born in village	not during Ebola	not during Ebola	not during Ebola	not during Ebola	Dry season birth	Some primary	1st			-0.165257		not believe clinic trans	during Ebola	6.7	0	0	0	0	0	0	1	0
1364	2	21	Not born at facility	Bassa	Yes	6.2	4.20117	0.390625	0.326316	13	born in village	not during Ebola	not during Ebola	not during Ebola	not during Ebola	Rainy season birth	none	1st			0.26542		not believe clinic trans	during Ebola	6.2	0	0	0	0	0	0	1	0
1312	3	34	Born at facility	Bassa	Yes	3.4	13.7235	0.151899	0.129231	28	born in village	not during Ebola	not during Ebola	not during Ebola	not during Ebola	Dry season birth	Some primary	4th or higher	3	3	-0.163493	2013	not believe clinic trans	not during Ebola	3.4	0	0	1	1	1	1	1	1
866	2	54	Born at facility	English	Yes	13.7	4.20117	0.390625	0.7	21	born in village	not during Ebola	not during Ebola	not during Ebola	not during Ebola	Dry season birth	Some primary	2nd-3rd			-0.243966		Believes clinic trans or unsure	during Ebola	10	3.7	0	0	0	0	0	1	0
232	2	30	Born at facility	Bassa	Yes	7.5	4.20117	0.390625	0.85	31	born in village	not during Ebola	not during Ebola	not during Ebola	not during Ebola	Rainy season birth	Some primary	2nd-3rd			-0.73		not believe clinic trans	during Ebola	7.5	0	0	0	0	0	0	1	0
507	1	7	Not born at facility	Bassa	Yes	17.1	6.24518	0.316456	0.4	21	NOT born in village	not during Ebola	not during Ebola	not during Ebola	not during Ebola	Rainy season birth	none	2nd-3rd			-0.613651		Believes clinic trans or unsure	during Ebola	10	7.1	0	0	0	0	0	1	0
1250	2	21	Born at facility	English	Yes	6.2	4.20117	0.390625	0.326316	36	born in village	not during Ebola	not during Ebola	not during Ebola	not during Ebola	Rainy season birth	Some Secondary or more	2nd-3rd			-0.243966		Believes clinic trans or unsure	during Ebola	6.2	0	0	0	0	0	0	1	0
590	1	8	Born at facility	Bassa	No	8.4	6.24518	0.316456	0.35	24	born in village	not during Ebola	not during Ebola	not during Ebola	not during Ebola	Dry season birth	none	2nd-3rd			0.0224782		Believes clinic trans or unsure	during Ebola	8.4	0	0	0	0	0	0	1	0
1426	2	32	Born at facility	Bassa	Yes	9.6	4.20117	0.390625	0.588235	42	born in village	not during Ebola	not during Ebola	not during Ebola	not during Ebola	Dry season birth	none	4th or higher	4	4	-0.860736	2012	not believe clinic trans	not during Ebola	9.6	0	0	1	1	1	0	1	1
458	2	26	Not born at facility	Bassa	No	11.2	4.20117	0.390625	0.636364	34	born in village	not during Ebola	not during Ebola	not during Ebola	not during Ebola	Dry season birth	none	4th or higher	4	4	-0.132438	2013	not believe clinic trans	not during Ebola	10	1.2	0	1	1	1	1	1	1
166	3	62	Born at facility	Bassa	Yes	2	13.7235	0.151899	0.238636	20	born in village	not during Ebola	not during Ebola	not during Ebola	not during Ebola	Rainy season birth	Some primary	2nd-3rd		1	-0.201197		Believes clinic trans or unsure	not during Ebola	2	0	0	0	1	0	0	1	0
87	2	24	Born at facility	English	Yes	6.7	4.20117	0.390625	0.59375	21	NOT born in village	not during Ebola	not during Ebola	not during Ebola	not during Ebola	Dry season birth	Some primary	2nd-3rd			-0.393431		Believes clinic trans or unsure	during Ebola	6.7	0	0	0	0	0	0	1	0
642	2	38	Not born at facility	Bassa	Yes	15.9	4.20117	0.390625	0.446808	22	born in village	not during Ebola	not during Ebola	not during Ebola	not during Ebola	Dry season birth	none	2nd-3rd			-0.752947		not believe clinic trans	during Ebola	10	5.9	0	0	0	0	0	1	0
501	1	9	Not born at facility	Bassa	Yes	5.2	6.24518	0.316456	0.913044	21	born in village	not during Ebola	not during Ebola	not during Ebola	not during Ebola	Rainy season birth	none	1st			-0.860736		Believes clinic trans or unsure	during Ebola	5.2	0	0	0	0	0	0	1	0
859	2	29	Not born at facility	Bassa	Yes	19.6	4.20117	0.390625	0.62069	17	born in village	not during Ebola	not during Ebola	not during Ebola	not during Ebola	Dry season birth	none	2nd-3rd			-0.252681		not believe clinic trans	during Ebola	10	9.6	0	0	0	0	0	1	0
260	1	50	Born at facility	Bassa	Yes	6.1	6.24518	0.316456	0.4375	25	born in village	not during Ebola	not during Ebola	not during Ebola	not during Ebola	Rainy season birth	Some primary	2nd-3rd	2	2	-0.73	2013	Believes clinic trans or unsure	not during Ebola	6.1	0	0	1	1	1	1	1	1
628	1	66	Not born at facility	English	Yes	15	6.24518	0.316456	0.653846	34	born in village	not during Ebola	not during Ebola	not during Ebola	not during Ebola	Rainy season birth	Some primary	1st			-0.164156		Believes clinic trans or unsure	during Ebola	10	5	0	0	0	0	0	1	0
949	2	39	Born at facility	Bassa	Yes	4.9	4.20117	0.390625	0.375	18	born in village	not during Ebola	not during Ebola	not during Ebola	not during Ebola	Dry season birth	Some primary	2nd-3rd			-0.0981312		not believe clinic trans	during Ebola	4.9	0	0	0	0	0	0	1	0
456	1	18	Born at facility	English	Yes	9.6	6.24518	0.316456	1	37	born in village	not during Ebola	not during Ebola	not during Ebola	not during Ebola	Rainy season birth	Some Secondary or more	1st	4	4	0.285875	2012	not believe clinic trans	not during Ebola	9.6	0	0	1	1	1	0	1	1
319	1	66	Born at facility	English	Yes	15	6.24518	0.316456	0.653846	24	born in village	not during Ebola	not during Ebola	not during Ebola	not during Ebola	Dry season birth	Some primary	2nd-3rd			0.22637		not believe clinic trans	during Ebola	10	5	0	0	0	0	0	1	0
1031	2	26	Born at facility	Bassa	Yes	11.2	4.20117	0.390625	0.636364	27	born in village	not during Ebola	not during Ebola	not during Ebola	not during Ebola	Rainy season birth	none	4th or higher			-0.860736		not believe clinic trans	during Ebola	10	1.2	0	0	0	0	0	1	0
777	1	69	Not born at facility	Bassa	Yes	15.6	6.24518	0.316456	0.590909	20	born in village	not during Ebola	not during Ebola	not during Ebola	not during Ebola	Rainy season birth	none	2nd-3rd			-0.486372		not believe clinic trans	during Ebola	10	5.6	0	0	0	0	0	1	0
978	1	43	Born at facility	Bassa	Yes	12.4	6.24518	0.316456	0.168	20	born in village	not during Ebola	not during Ebola	not during Ebola	not during Ebola	Dry season birth	Some primary	2nd-3rd			-0.493213		Believes clinic trans or unsure	during Ebola	10	2.4	0	0	0	0	0	1	0
800	3	48	Not born at facility	Bassa	Yes	4.1	13.7235	0.151899	0.52381	32	born in village	not during Ebola	not during Ebola	not during Ebola	not during Ebola	Rainy season birth	none	2nd-3rd	4	4	-0.517453	2013	Believes clinic trans or unsure	not during Ebola	4.1	0	0	1	1	1	1	1	1
1383	2	20	Born at facility	Bassa	No	6.2	4.20117	0.390625	0.326316	35	NOT born in village	not during Ebola	not during Ebola	not during Ebola	not during Ebola	Rainy season birth	Some Secondary or more	4th or higher	4	4	-0.613457	2011	Believes clinic trans or unsure	not during Ebola	6.2	0	0	1	1	1	0	1	1
1341	3	34	Born at facility	English	Yes	3.4	13.7235	0.151899	0.129231	27	NOT born in village	not during Ebola	not during Ebola	not during Ebola	not during Ebola	Dry season birth	none	4th or higher			2.47835		Believes clinic trans or unsure	during Ebola	3.4	0	0	0	0	0	0	1	0
772	1	45	Not born at facility	Bassa	Yes	20.9	6.24518	0.316456	0.333333	25	born in village	not during Ebola	not during Ebola	not during Ebola	not during Ebola	Rainy season birth	Some primary	2nd-3rd			-0.346882		Believes clinic trans or unsure	during Ebola	10	10.9	0	0	0	0	0	1	0
786	1	10	Born at facility	English	Yes	24.2	6.24518	0.316456	0.2625	26	NOT born in village	not during Ebola	not during Ebola	not during Ebola	not during Ebola	Rainy season birth	none	2nd-3rd			-0.23579		Believes clinic trans or unsure	during Ebola	10	11	3.2	0	0	0	0	1	0
1420	2	35	Not born at facility	English	Yes	11.4	4.20117	0.390625	0.84	28	born in village	not during Ebola	not during Ebola	not during Ebola	not during Ebola	Rainy season birth	Some primary	4th or higher			-0.480088		not believe clinic trans	during Ebola	10	1.4	0	0	0	0	0	1	0
763	3	25	Born at facility	English	Yes	0.1	13.7235	0.151899	0.212121	24	born in village	not during Ebola	not during Ebola	not during Ebola	not during Ebola	Dry season birth	Some Secondary or more	2nd-3rd			0.481147		Believes clinic trans or unsure	during Ebola	0.1	0	0	0	0	0	0	1	0
1278	2	20	Not born at facility	Bassa	Yes	6.2	4.20117	0.390625	0.326316	27	born in village	not during Ebola	not during Ebola	not during Ebola	not during Ebola	Dry season birth	none	1st			0.633037		Believes clinic trans or unsure	during Ebola	6.2	0	0	0	0	0	0	1	0
375	3	53	Not born at facility	English	No	0.1	13.7235	0.151899	0.0771605	26	NOT born in village	not during Ebola	not during Ebola	not during Ebola	not during Ebola	Dry season birth	none	2nd-3rd			3.35173		Believes clinic trans or unsure	during Ebola	0.1	0	0	0	0	0	0	1	0
830	1	65	Born at facility	Bassa	Yes	5.2	6.24518	0.316456	0.782609	16	NOT born in village	not during Ebola	not during Ebola	not during Ebola	not during Ebola	Dry season birth	Some primary	1st			-0.860736		Believes clinic trans or unsure	during Ebola	5.2	0	0	0	0	0	0	1	0
885	3	68	Born at facility	English	Yes	0.1	13.7235	0.151899	0.145833	14	born in village	not during Ebola	not during Ebola	not during Ebola	not during Ebola	Dry season birth	Some Secondary or more	1st			3.63173		Believes clinic trans or unsure	during Ebola	0.1	0	0	0	0	0	0	1	0
534	1	8	Born at facility	English	Yes	8.4	6.24518	0.316456	0.35	21	NOT born in village	not during Ebola	not during Ebola	not during Ebola	not during Ebola	Rainy season birth	Some primary	1st	1	1	-0.749645	2012	Believes clinic trans or unsure	not during Ebola	8.4	0	0	1	1	1	0	1	1
1253	2	21	Born at facility	Bassa	No	6.2	4.20117	0.390625	0.326316	24	born in village	not during Ebola	not during Ebola	not during Ebola	not during Ebola	Rainy season birth	Some primary	2nd-3rd	2	2	0.0983801	2013	Believes clinic trans or unsure	not during Ebola	6.2	0	0	1	1	1	1	1	1
613	1	6	Born at facility	English	No	10.9	6.24518	0.316456	0.287671	19	born in village	not during Ebola	not during Ebola	not during Ebola	not during Ebola	Rainy season birth	Some primary	1st			0.149298		Believes clinic trans or unsure	during Ebola	10	0.9	0	0	0	0	0	1	0
315	1	67	Born at facility	English	Yes	5.6	6.24518	0.316456	0.416667	16	born in village	not during Ebola	not during Ebola	not during Ebola	not during Ebola	Rainy season birth	Some primary	2nd-3rd			-0.0929033		not believe clinic trans	during Ebola	5.6	0	0	0	0	0	0	1	0
487	1	11	Born at facility	English	Yes	16	6.24518	0.316456	0.2	17	born in village	not during Ebola	not during Ebola	not during Ebola	not during Ebola	Rainy season birth	Some primary	1st		1	1.19293		Believes clinic trans or unsure	not during Ebola	10	6	0	0	1	0	0	1	0
1043	1	18	Not born at facility	Bassa	No	9.6	6.24518	0.316456	1	24	NOT born in village	not during Ebola	not during Ebola	not during Ebola	not during Ebola	Rainy season birth	Some primary	2nd-3rd			-0.604655		Believes clinic trans or unsure	during Ebola	9.6	0	0	0	0	0	0	1	0
490	1	67	Not born at facility	Bassa	Yes	5.6	6.24518	0.316456	0.416667	32	born in village	not during Ebola	not during Ebola	not during Ebola	not during Ebola	Dry season birth	none	2nd-3rd			0.292048		Believes clinic trans or unsure	during Ebola	5.6	0	0	0	0	0	0	1	0
1447	2	35	Born at facility	Bassa	Yes	11.4	4.20117	0.390625	0.84	25	born in village	not during Ebola	not during Ebola	not during Ebola	not during Ebola	Dry season birth	none	4th or higher	2	2	-0.860736	2013	not believe clinic trans	not during Ebola	10	1.4	0	1	1	1	1	1	1
529	2	30	Not born at facility	Bassa	Yes	7.5	4.20117	0.390625	0.85	33	born in village	not during Ebola	not during Ebola	not during Ebola	not during Ebola	Rainy season birth	none	2nd-3rd			-0.860736		not believe clinic trans	during Ebola	7.5	0	0	0	0	0	0	1	0
1143	2	54	Born at facility	Bassa	Yes	13.7	4.20117	0.390625	0.7	32	born in village	not during Ebola	not during Ebola	not during Ebola	not during Ebola	Dry season birth	none	4th or higher			-0.468903		not believe clinic trans	during Ebola	10	3.7	0	0	0	0	0	1	0
867	1	45	Born at facility	Bassa	Yes	20.9	6.24518	0.316456	0.333333	15	NOT born in village	not during Ebola	not during Ebola	not during Ebola	not during Ebola	Rainy season birth	none	1st			-0.367492		Believes clinic trans or unsure	during Ebola	10	10.9	0	0	0	0	0	1	0
182	1	13	Born at facility	English	Yes	19.1	6.24518	0.316456	0.207237	28	born in village	not during Ebola	not during Ebola	not during Ebola	not during Ebola	Dry season birth	none	2nd-3rd	3	3	-0.0003889	2013	Believes clinic trans or unsure	not during Ebola	10	9.1	0	1	1	1	1	1	1
210	1	13	Born at facility	Bassa	Yes	19.1	6.24518	0.316456	0.207237	21	NOT born in village	not during Ebola	not during Ebola	not during Ebola	not during Ebola	Rainy season birth	none	1st	1	1	0.822512	2011	Believes clinic trans or unsure	not during Ebola	10	9.1	0	1	1	0	0	1	1
179	2	29	Not born at facility	Bassa	Yes	19.6	4.20117	0.390625	0.62069	18	born in village	not during Ebola	not during Ebola	not during Ebola	not during Ebola	Dry season birth	Some primary	2nd-3rd			-0.752947		Believes clinic trans or unsure	during Ebola	10	9.6	0	0	0	0	0	1	0
596	1	5	Born at facility	English	Yes	29.3	6.24518	0.316456	0.642857	21	born in village	not during Ebola	not during Ebola	not during Ebola	not during Ebola	Rainy season birth	none	1st			-0.749645		Believes clinic trans or unsure	during Ebola	10	11	8.3	0	0	0	0	1	0
539	1	67	Born at facility	English	Yes	5.6	6.24518	0.316456	0.416667	35	born in village	not during Ebola	not during Ebola	not during Ebola	not during Ebola	Rainy season birth	none	2nd-3rd	4	4	0.185621	2013	not believe clinic trans	not during Ebola	5.6	0	0	1	1	1	1	1	1
88	1	1	Not born at facility	Bassa	Yes	20.5	6.24518	0.316456	0.232558	26	born in village	not during Ebola	not during Ebola	not during Ebola	not during Ebola	Dry season birth	Some primary	1st			-0.0901048		not believe clinic trans	during Ebola	10	10.5	0	0	0	0	0	1	0
406	2	63	Not born at facility	Bassa	No	10	4.20117	0.390625	0.48	37	born in village	not during Ebola	not during Ebola	not during Ebola	not during Ebola	Dry season birth	none	1st	4	4	-0.589147	2012		not during Ebola	10	0	0	1	1	1	0	1	1
293	2	27	Born at facility	Bassa	Yes	5.2	4.20117	0.390625	0.75	18	born in village	not during Ebola	not during Ebola	not during Ebola	not during Ebola	Rainy season birth	none	1st			-0.0809531		Believes clinic trans or unsure	during Ebola	5.2	0	0	0	0	0	0	1	0
1113	2	31	Not born at facility	Bassa	Yes	8.2	4.20117	0.390625	0.525	13	born in village	not during Ebola	not during Ebola	not during Ebola	not during Ebola	Dry season birth	none	1st			-0.860736		Believes clinic trans or unsure	during Ebola	8.2	0	0	0	0	0	0	1	0
1439	2	32	Born at facility	Bassa	Yes	9.6	4.20117	0.390625	0.588235	31	born in village	not during Ebola	not during Ebola	not during Ebola	during Ebola	Rainy season birth	Some primary	4th or higher	3	3	-0.860736	2013	Believes clinic trans or unsure	not during Ebola	9.6	0	0	1	1	1	1	1	1
1306	2	21	Born at facility	Bassa	Yes	6.2	4.20117	0.390625	0.326316	17	born in village	not during Ebola	not during Ebola	not during Ebola	not during Ebola	Dry season birth	Some primary	1st		1	-0.228371		Believes clinic trans or unsure	not during Ebola	6.2	0	0	0	1	0	0	1	0
1216	1	11	Born at facility	English	Yes	16	6.24518	0.316456	0.2	35	born in village	not during Ebola	not during Ebola	not during Ebola	not during Ebola	Rainy season birth	Some primary	4th or higher			-0.406362		Believes clinic trans or unsure	during Ebola	10	6	0	0	0	0	0	1	0
1309	2	21	Born at facility	English	Yes	6.2	4.20117	0.390625	0.326316	23	born in village	not during Ebola	not during Ebola	not during Ebola	not during Ebola	Rainy season birth	Some Secondary or more	2nd-3rd			-0.0541823		Believes clinic trans or unsure	during Ebola	6.2	0	0	0	0	0	0	1	0
810	2	36	Born at facility	Bassa	Yes	5.8	4.20117	0.390625	0.761905	24	born in village	not during Ebola	not during Ebola	not during Ebola	not during Ebola	Rainy season birth	none	4th or higher	2	2	-0.860736	2011	not believe clinic trans	not during Ebola	5.8	0	0	1	1	0	0	1	1
442	3	62	Not born at facility	English	Yes	2	13.7235	0.151899	0.238636	26	NOT born in village	not during Ebola	not during Ebola	not during Ebola	not during Ebola	Dry season birth	none	2nd-3rd			0.880197		Believes clinic trans or unsure	during Ebola	2	0	0	0	0	0	0	1	0
154	1	4	Born at facility	English	Yes	5.6	6.24518	0.316456	0.525	21	born in village	not during Ebola	not during Ebola	not during Ebola	not during Ebola	Dry season birth	Some primary	2nd-3rd			-0.27289		Believes clinic trans or unsure	during Ebola	5.6	0	0	0	0	0	0	1	0
26	2	27	Born at facility	Bassa	Yes	5.2	4.20117	0.390625	0.75	30	born in village	not during Ebola	not during Ebola	not during Ebola	not during Ebola	Dry season birth	none	2nd-3rd	3	3	-0.0786077	2011	not believe clinic trans	not during Ebola	5.2	0	0	1	1	0	0	1	1
1294	2	21	Born at facility	Bassa	Yes	6.2	4.20117	0.390625	0.326316	18	born in village	not during Ebola	not during Ebola	not during Ebola	not during Ebola	Rainy season birth	Some primary	2nd-3rd			1.38726		not believe clinic trans	during Ebola	6.2	0	0	0	0	0	0	1	0
1353	2	20	Not born at facility	English	Yes	6.2	4.20117	0.390625	0.326316	30	born in village	not during Ebola	not during Ebola	not during Ebola	not during Ebola	Dry season birth	none	4th or higher	3	3	0.294831		Believes clinic trans or unsure	not during Ebola	6.2	0	0	1	1	0	0	1	1
1258	2	19	Born at facility	Bassa	Yes	6.2	4.20117	0.390625	0.326316	34	born in village	not during Ebola	not during Ebola	not during Ebola	not during Ebola	Dry season birth	none	2nd-3rd	4	4	-0.354093	2013	Believes clinic trans or unsure	not during Ebola	6.2	0	0	1	1	1	1	1	1
667	3	48	Not born at facility	Bassa	Yes	3.7	13.7235	0.151899	0.52381	20	NOT born in village	not during Ebola	not during Ebola	not during Ebola	not during Ebola	Dry season birth	Some primary	1st			-0.494946		not believe clinic trans	during Ebola	3.7	0	0	0	0	0	0	1	0
596	1	5	Born at facility	English	Yes	29.3	6.24518	0.316456	0.642857	28	born in village	not during Ebola	not during Ebola	not during Ebola	not during Ebola	Dry season birth	none	2nd-3rd	3	3	-0.749645	2011	Believes clinic trans or unsure	not during Ebola	10	11	8.3	1	1	0	0	1	1
1364	2	21	Not born at facility	Bassa	Yes	6.2	4.20117	0.390625	0.326316	28	born in village	not during Ebola	not during Ebola	not during Ebola	not during Ebola	Rainy season birth	Some primary	2nd-3rd			0.26542		not believe clinic trans	during Ebola	6.2	0	0	0	0	0	0	1	0
238	2	38	Not born at facility	Bassa	Yes	15.9	4.20117	0.390625	0.446808	16	born in village	not during Ebola	not during Ebola	not during Ebola	not during Ebola	Dry season birth	Some primary	1st			-0.724898		Believes clinic trans or unsure	during Ebola	10	5.9	0	0	0	0	0	1	0
988	2	29	Not born at facility	Bassa	Yes	19.6	4.20117	0.390625	0.62069	33	born in village	not during Ebola	not during Ebola	not during Ebola	not during Ebola	Rainy season birth	Some primary	4th or higher	4	4	-0.238864	2011	Believes clinic trans or unsure	not during Ebola	10	9.6	0	1	1	0	0	1	1
1380	3	42	Born at facility	Bassa	Yes	4.2	13.7235	0.151899	0.55	19	born in village	not during Ebola	not during Ebola	not during Ebola	not during Ebola	Dry season birth	none	1st	1	1	-0.433388	2013	not believe clinic trans	not during Ebola	4.2	0	0	1	1	1	1	1	1
830	1	65	Not born at facility	Bassa	Yes	5.2	6.24518	0.316456	0.782609	18	born in village	not during Ebola	not during Ebola	not during Ebola	not during Ebola	Rainy season birth	none	1st			-0.860736		not believe clinic trans	during Ebola	5.2	0	0	0	0	0	0	1	0
1006	1	18	Born at facility	Bassa	Yes	9.6	6.24518	0.316456	1	23	born in village	not during Ebola	not during Ebola	not during Ebola	not during Ebola	Dry season birth	none	1st			0.0710986		not believe clinic trans	during Ebola	9.6	0	0	0	0	0	0	1	0
1371	2	19	Born at facility	Bassa	Yes	6.2	4.20117	0.390625	0.326316	25	born in village	not during Ebola	not during Ebola	not during Ebola	not during Ebola	Dry season birth	Some Secondary or more	2nd-3rd	2	2	-0.749645	2011		not during Ebola	6.2	0	0	1	1	0	0	1	1
219	2	31	Born at facility	Bassa	No	8.2	4.20117	0.390625	0.525	36	born in village	not during Ebola	not during Ebola	not during Ebola	not during Ebola	Rainy season birth	none	4th or higher	4	4	-0.0068402	2013	Believes clinic trans or unsure	not during Ebola	8.2	0	0	1	1	1	1	1	1
961	1	47	Born at facility	Bassa	No	8	6.24518	0.316456	0.328125	40	born in village	not during Ebola	not during Ebola	not during Ebola	not during Ebola	Dry season birth	none	4th or higher			-0.359108		Believes clinic trans or unsure	during Ebola	8	0	0	0	0	0	0	1	0
1464	1	44	Not born at facility	Bassa	No	12.4	6.24518	0.316456	0.168	27	born in village	not during Ebola	not during Ebola	not during Ebola	not during Ebola	Dry season birth	none	2nd-3rd	3	3	-0.632703	2012	not believe clinic trans	not during Ebola	10	2.4	0	1	1	1	0	1	1
848	1	51	Not born at facility	English	Yes	16.3	6.24518	0.316456	0.365385	.i	born in village	not during Ebola	not during Ebola	not during Ebola	not during Ebola	Dry season birth	none	1st			0.288687		Believes clinic trans or unsure	during Ebola	10	6.3	0	0	0	0	0	1	0
1139	1	12	Born at facility	English	Yes	19.1	6.24518	0.316456	0.207237	25	NOT born in village	not during Ebola	not during Ebola	not during Ebola	not during Ebola	Rainy season birth	Some Secondary or more	1st			-0.296475		Believes clinic trans or unsure	during Ebola	10	9.1	0	0	0	0	0	1	0
1030	2	28	Born at facility	English	Yes	8.3	4.20117	0.390625	0.411765	19	NOT born in village	not during Ebola	not during Ebola	not during Ebola	not during Ebola	Rainy season birth	Some primary	1st			0.58858		Believes clinic trans or unsure	during Ebola	8.3	0	0	0	0	0	0	1	0
424	2	60	Not born at facility	Bassa	Yes	5.6	4.20117	0.390625	0.28	20	born in village	not during Ebola	not during Ebola	not during Ebola	not during Ebola	Dry season birth	none	2nd-3rd			-0.613457		Believes clinic trans or unsure	during Ebola	5.6	0	0	0	0	0	0	1	0
126	1	47	Born at facility	English	No	8	6.24518	0.316456	0.328125	15	born in village	not during Ebola	not during Ebola	not during Ebola	not during Ebola	Dry season birth	Some Secondary or more	1st			-0.388519		Believes clinic trans or unsure	during Ebola	8	0	0	0	0	0	0	1	0
1091	3	25	Born at facility	Bassa	Yes	0.1	13.7235	0.151899	0.212121	24	born in village	not during Ebola	not during Ebola	not during Ebola	not during Ebola	Dry season birth	Some primary	2nd-3rd	2	2	-0.316447	2013	not believe clinic trans	not during Ebola	0.1	0	0	1	1	1	1	1	1
1274	3	42	Born at facility	English	Yes	4.2	13.7235	0.151899	0.55	17	NOT born in village	not during Ebola	not during Ebola	not during Ebola	not during Ebola	Rainy season birth	Some primary	1st	1	1	1.01624	2013	not believe clinic trans	not during Ebola	4.2	0	0	1	1	1	1	1	1
238	2	38	Born at facility	English	No	15.9	4.20117	0.390625	0.446808	25	NOT born in village	not during Ebola	not during Ebola	not during Ebola	not during Ebola	Rainy season birth	Some Secondary or more	1st	2	2	-0.724898	2013	not believe clinic trans	not during Ebola	10	5.9	0	1	1	1	1	1	1
1241	2	19	Born at facility	English	Yes	6.2	4.20117	0.390625	0.326316	38	born in village	not during Ebola	not during Ebola	not during Ebola	not during Ebola	Dry season birth	none	4th or higher	4	4	1.49396	2012	Believes clinic trans or unsure	not during Ebola	6.2	0	0	1	1	1	0	1	1
79	3	68	Born at facility	English	Yes	0.1	13.7235	0.151899	0.145833	22	born in village	not during Ebola	not during Ebola	not during Ebola	not during Ebola	Rainy season birth	none	4th or higher			-0.354093		Believes clinic trans or unsure	during Ebola	0.1	0	0	0	0	0	0	1	0
439	2	27	Born at facility	Bassa	Yes	5.2	4.20117	0.390625	0.75	18	born in village	not during Ebola	not during Ebola	not during Ebola	not during Ebola	Rainy season birth	none	2nd-3rd			-0.201197		not believe clinic trans	during Ebola	5.2	0	0	0	0	0	0	1	0
173	1	47	Born at facility	Bassa	Yes	8	6.24518	0.316456	0.328125	34	born in village	not during Ebola	not during Ebola	not during Ebola	not during Ebola	Rainy season birth	none	1st			0.87881		not believe clinic trans	during Ebola	8	0	0	0	0	0	0	1	0
1215	3	48	Born at facility	Bassa	Yes	3.7	13.7235	0.151899	0.52381	26	born in village	not during Ebola	not during Ebola	not during Ebola	not during Ebola	Rainy season birth	none	1st	3	3	-0.494946	2013	not believe clinic trans	not during Ebola	3.7	0	0	1	1	1	1	1	1
1333	3	33	Born at facility	Bassa	Yes	3.4	13.7235	0.151899	0.129231	23	born in village	not during Ebola	not during Ebola	not during Ebola	not during Ebola	Rainy season birth	Some primary	1st		2	0.224434		not believe clinic trans	not during Ebola	3.4	0	0	0	1	0	0	1	0
162	3	46	Not born at facility	English	No	0.1	13.7235	0.151899	0.07	16	born in village	not during Ebola	not during Ebola	not during Ebola	not during Ebola	Dry season birth	Some primary	1st			-0.243966		not believe clinic trans	during Ebola	0.1	0	0	0	0	0	0	1	0
161	2	27	Not born at facility	English	No	5.2	4.20117	0.390625	0.75	23	born in village	not during Ebola	not during Ebola	not during Ebola	not during Ebola	Rainy season birth	none	1st			0.0054452		not believe clinic trans	during Ebola	5.2	0	0	0	0	0	0	1	0
851	1	13	Born at facility	English	Yes	19.1	6.24518	0.316456	0.207237	20	born in village	not during Ebola	not during Ebola	not during Ebola	not during Ebola	Dry season birth	Some primary	1st	1	1	0.624483	2013	Believes clinic trans or unsure	not during Ebola	10	9.1	0	1	1	1	1	1	1
1381	3	34	Born at facility	Bassa	No	3.4	13.7235	0.151899	0.129231	20	born in village	not during Ebola	not during Ebola	not during Ebola	not during Ebola	Dry season birth	Some Secondary or more	1st			0.355026		not believe clinic trans	during Ebola	3.4	0	0	0	0	0	0	1	0
887	1	70	Not born at facility	Bassa	No	30.8	6.24518	0.316456	0.486486	20	born in village	not during Ebola	not during Ebola	not during Ebola	not during Ebola	Dry season birth	none	1st	1	1	-0.555297	2012	not believe clinic trans	not during Ebola	10	11	9.8	1	1	1	0	1	1
791	1	43	Not born at facility	Bassa	No	12.4	6.24518	0.316456	0.168	30	born in village	not during Ebola	not during Ebola	not during Ebola	not during Ebola	Dry season birth	none	4th or higher	3	3	-0.374702	2013	Believes clinic trans or unsure	not during Ebola	10	2.4	0	1	1	1	1	1	1
1093	2	38	Not born at facility	Bassa	Yes	15.9	4.20117	0.390625	0.446808	31	born in village	not during Ebola	not during Ebola	not during Ebola	not during Ebola	Rainy season birth	none	2nd-3rd	3	3	-0.860736	2011	not believe clinic trans	not during Ebola	10	5.9	0	1	1	0	0	1	1
208	2	55	Not born at facility	English	Yes	18.4	4.20117	0.390625	0.565217	30	born in village	not during Ebola	not during Ebola	not during Ebola	not during Ebola	Rainy season birth	none	2nd-3rd			-0.493213		Believes clinic trans or unsure	during Ebola	10	8.4	0	0	0	0	0	1	0
278	1	69	Born at facility	Bassa	Yes	15.6	6.24518	0.316456	0.590909	18	born in village	not during Ebola	not during Ebola	not during Ebola	not during Ebola	Rainy season birth	Some primary	1st	1	1	-0.73	2011	Believes clinic trans or unsure	not during Ebola	10	5.6	0	1	1	0	0	1	1
229	2	55	Not born at facility	Bassa	Yes	18.4	4.20117	0.390625	0.565217	26	born in village	not during Ebola	not during Ebola	not during Ebola	not during Ebola	Rainy season birth	Some primary	2nd-3rd			-0.740493		not believe clinic trans	during Ebola	10	8.4	0	0	0	0	0	1	0
886	2	36	Not born at facility	Bassa	Yes	5.8	4.20117	0.390625	0.761905	20	born in village	not during Ebola	not during Ebola	not during Ebola	not during Ebola	Dry season birth	none	2nd-3rd			-0.860736		Believes clinic trans or unsure	during Ebola	5.8	0	0	0	0	0	0	1	0
505	1	12	Born at facility	English	Yes	19.1	6.24518	0.316456	0.207237	21	NOT born in village	not during Ebola	not during Ebola	not during Ebola	not during Ebola	Rainy season birth	Some Secondary or more	2nd-3rd			-0.382122		Believes clinic trans or unsure	during Ebola	10	9.1	0	0	0	0	0	1	0
46	2	58	Born at facility	Bassa	No	19.8	4.20117	0.390625	0.28	26	born in village	not during Ebola	not during Ebola	not during Ebola	not during Ebola	Dry season birth	none	1st			-0.721441		not believe clinic trans	during Ebola	10	9.8	0	0	0	0	0	1	0
111	2	23	Not born at facility	Bassa	Yes	5.6	4.20117	0.390625	0.583333	.i	born in village	not during Ebola	not during Ebola	not during Ebola	not during Ebola	Dry season birth	none	2nd-3rd			-0.374702		Believes clinic trans or unsure	during Ebola	5.6	0	0	0	0	0	0	1	0
1071	1	7	Born at facility	Bassa	Yes	16.1	6.24518	0.316456	0.4	.i	NOT born in village	not during Ebola	not during Ebola	not during Ebola	not during Ebola	Rainy season birth	none	1st			-0.689267		Believes clinic trans or unsure	during Ebola	10	6.1	0	0	0	0	0	1	0
67	1	50	Born at facility	English	Yes	5.3	6.24518	0.316456	0.4375	27	born in village	not during Ebola	not during Ebola	not during Ebola	not during Ebola	Dry season birth	none	1st	3	3	3.76541	2012	not believe clinic trans	not during Ebola	5.3	0	0	1	1	1	0	1	1
1468	1	44	Not born at facility	Bassa	Yes	12.4	6.24518	0.316456	0.168	14	born in village	not during Ebola	not during Ebola	not during Ebola	not during Ebola	Dry season birth	none	1st			-0.860736			during Ebola	10	2.4	0	0	0	0	0	1	0
26	2	27	Born at facility	Bassa	Yes	5.2	4.20117	0.390625	0.75	18	born in village	not during Ebola	not during Ebola	not during Ebola	not during Ebola	Dry season birth	none	1st			-0.0786077		Believes clinic trans or unsure	during Ebola	5.2	0	0	0	0	0	0	1	0
134	1	43	Born at facility	Bassa	No	12.4	6.24518	0.316456	0.168	21	born in village	not during Ebola	not during Ebola	not during Ebola	not during Ebola	Dry season birth	Some primary	1st		1	-0.246303		Believes clinic trans or unsure	not during Ebola	10	2.4	0	0	1	0	0	1	0
846	1	66	Born at facility	English	Yes	15	6.24518	0.316456	0.653846	25	born in village	not during Ebola	not during Ebola	not during Ebola	not during Ebola	Dry season birth	none	2nd-3rd			-0.282345		Believes clinic trans or unsure	during Ebola	10	5	0	0	0	0	0	1	0
641	2	64	Born at facility	English	Yes	7.2	4.20117	0.390625	0.333333	14	born in village	not during Ebola	not during Ebola	not during Ebola	not during Ebola	Rainy season birth	Some primary	1st	1	1	-0.50333	2011	Believes clinic trans or unsure	not during Ebola	7.2	0	0	1	1	0	0	1	1
312	3	57	Born at facility	Bassa	Yes	4.4	13.7235	0.151899	0.538462	28	born in village	not during Ebola	not during Ebola	not during Ebola	not during Ebola	Rainy season birth	none	2nd-3rd			-0.860736		not believe clinic trans	during Ebola	4.4	0	0	0	0	0	0	1	0
627	3	57	Born at facility	English	No	4.4	13.7235	0.151899	0.538462	24	born in village	not during Ebola	not during Ebola	not during Ebola	not during Ebola	Dry season birth	none	1st	2	2	-0.685364	2011	not believe clinic trans	not during Ebola	4.4	0	0	1	1	0	0	1	1
1267	2	41	Not born at facility	Bassa	Yes	9.4	4.20117	0.390625	0.913044	20	born in village	not during Ebola	not during Ebola	not during Ebola	not during Ebola	Dry season birth	none	2nd-3rd			-0.366129		Believes clinic trans or unsure	during Ebola	9.4	0	0	0	0	0	0	1	0
76	3	52	Born at facility	English	Yes	0.1	13.7235	0.151899	0.0771605	17	NOT born in village	not during Ebola	not during Ebola	not during Ebola	not during Ebola	Rainy season birth	none	1st			1.60476			during Ebola	0.1	0	0	0	0	0	0	1	0
856	2	24	Born at facility	Bassa	Yes	6.7	4.20117	0.390625	0.59375	27	born in village	not during Ebola	not during Ebola	not during Ebola	not during Ebola	Dry season birth	Some primary	4th or higher			-0.363669		not believe clinic trans	during Ebola	6.7	0	0	0	0	0	0	1	0
1232	3	42	Not born at facility	Bassa	Yes	4.2	13.7235	0.151899	0.55	.i	born in village	not during Ebola	not during Ebola	not during Ebola	not during Ebola	Rainy season birth	none	2nd-3rd			-0.113034		not believe clinic trans	during Ebola	4.2	0	0	0	0	0	0	1	0
988	2	29	Not born at facility	Bassa	Yes	19.6	4.20117	0.390625	0.62069	15	born in village	not during Ebola	not during Ebola	not during Ebola	not during Ebola	Rainy season birth	Some primary	1st			-0.238864		Believes clinic trans or unsure	during Ebola	10	9.6	0	0	0	0	0	1	0
459	1	65	Not born at facility	Bassa	Yes	5.4	6.24518	0.316456	0.782609	25	born in village	not during Ebola	not during Ebola	not during Ebola	not during Ebola	Rainy season birth	none	2nd-3rd			-0.613457			during Ebola	5.4	0	0	0	0	0	0	1	0
1245	3	34	Born at facility	English	Yes	3.4	13.7235	0.151899	0.129231	27	born in village	not during Ebola	not during Ebola	not during Ebola	not during Ebola	Rainy season birth	none	2nd-3rd	3	3	-0.0350941	2011	Believes clinic trans or unsure	not during Ebola	3.4	0	0	1	1	1	0	1	1
383	1	70	Not born at facility	Bassa	Yes	32.8	6.24518	0.316456	0.486486	22	born in village	not during Ebola	not during Ebola	not during Ebola	not during Ebola	Rainy season birth	none	1st			-0.457331		not believe clinic trans	during Ebola	10	11	11.8	0	0	0	0	1	0
885	3	68	Born at facility	English	Yes	0.1	13.7235	0.151899	0.145833	16	born in village	not during Ebola	not during Ebola	not during Ebola	not during Ebola	Rainy season birth	Some Secondary or more	2nd-3rd			3.63173		Believes clinic trans or unsure	during Ebola	0.1	0	0	0	0	0	0	1	0
216	3	22	Born at facility	English	Yes	0.1	13.7235	0.151899	0.084	24	born in village	not during Ebola	not during Ebola	not during Ebola	not during Ebola	Rainy season birth	Some Secondary or more	1st	2	2	3.94835	2012	not believe clinic trans	not during Ebola	0.1	0	0	1	1	1	0	1	1
1214	2	60	Born at facility	English	No	5.6	4.20117	0.390625	0.28	15	born in village	not during Ebola	not during Ebola	not during Ebola	not during Ebola	Dry season birth	none	1st			1.14504		Believes clinic trans or unsure	during Ebola	5.6	0	0	0	0	0	0	1	0
1054	1	8	Born at facility	English	Yes	8.4	6.24518	0.316456	0.35	23	NOT born in village	not during Ebola	not during Ebola	not during Ebola	not during Ebola	Dry season birth	Some Secondary or more	1st			-0.54448		Believes clinic trans or unsure	during Ebola	8.4	0	0	0	0	0	0	1	0
1447	2	35	Not born at facility	Bassa	Yes	11.4	4.20117	0.390625	0.84	15	born in village	not during Ebola	not during Ebola	not during Ebola	not during Ebola	Rainy season birth	none	1st			-0.860736		not believe clinic trans	during Ebola	10	1.4	0	0	0	0	0	1	0
1267	2	41	Not born at facility	Bassa	Yes	9.4	4.20117	0.390625	0.913044	22	born in village	not during Ebola	not during Ebola	not during Ebola	not during Ebola	Dry season birth	none	2nd-3rd			-0.366129		Believes clinic trans or unsure	during Ebola	9.4	0	0	0	0	0	0	1	0
1455	1	44	Not born at facility	English	Yes	12.4	6.24518	0.316456	0.168	16	born in village	not during Ebola	not during Ebola	not during Ebola	not during Ebola	Dry season birth	Some primary	1st			-0.860736		Believes clinic trans or unsure	during Ebola	10	2.4	0	0	0	0	0	1	0
1083	3	25	Born at facility	Bassa	Yes	0.1	13.7235	0.151899	0.212121	18	born in village	not during Ebola	not during Ebola	not during Ebola	not during Ebola	Dry season birth	Some primary	1st			0.064872		Believes clinic trans or unsure	during Ebola	0.1	0	0	0	0	0	0	1	0
525	1	50	Born at facility	Bassa	Yes	6.1	6.24518	0.316456	0.4375	21	born in village	not during Ebola	not during Ebola	not during Ebola	not during Ebola	Rainy season birth	none	2nd-3rd			-0.719883		not believe clinic trans	during Ebola	6.1	0	0	0	0	0	0	1	0
829	1	18	Born at facility	English	No	9.6	6.24518	0.316456	1	26	NOT born in village	not during Ebola	not during Ebola	not during Ebola	not during Ebola	Rainy season birth	Some primary	2nd-3rd			-0.463802		Believes clinic trans or unsure	during Ebola	9.6	0	0	0	0	0	0	1	0
973	2	64	Born at facility	English	Yes	7.2	4.20117	0.390625	0.333333	16	born in village	not during Ebola	not during Ebola	not during Ebola	not during Ebola	Rainy season birth	Some primary	1st			-0.554628		not believe clinic trans	during Ebola	7.2	0	0	0	0	0	0	1	0
1328	1	15	Not born at facility	English	No	24.5	6.24518	0.316456	0.625	22	born in village	not during Ebola	not during Ebola	not during Ebola	not during Ebola	Rainy season birth	Some Secondary or more	1st	2	2	-0.146584	2013	Believes clinic trans or unsure	not during Ebola	10	11	3.5	1	1	1	1	1	1
690	2	54	Born at facility	English	Yes	5.4	4.20117	0.390625	0.7	25	born in village	not during Ebola	not during Ebola	not during Ebola	not during Ebola	Rainy season birth	Some primary	4th or higher			3.21082		Believes clinic trans or unsure	during Ebola	5.4	0	0	0	0	0	0	1	0
613	1	6	Not born at facility	Bassa	Yes	10.9	6.24518	0.316456	0.287671	.i	born in village	not during Ebola	not during Ebola	not during Ebola	not during Ebola	Rainy season birth	Some primary	1st			0.149298		Believes clinic trans or unsure	during Ebola	10	0.9	0	0	0	0	0	1	0
1077	1	9	Not born at facility	Bassa	Yes	5.2	6.24518	0.316456	0.913044	19	born in village	not during Ebola	not during Ebola	not during Ebola	not during Ebola	Rainy season birth	none	1st			-0.73		Believes clinic trans or unsure	during Ebola	5.2	0	0	0	0	0	0	1	0
635	2	56	Not born at facility	Bassa	Yes	8.6	4.20117	0.390625	0.709677	31	born in village	not during Ebola	not during Ebola	not during Ebola	not during Ebola	Rainy season birth	none	1st			0.353644		Believes clinic trans or unsure	during Ebola	8.6	0	0	0	0	0	0	1	0
508	3	53	Not born at facility	English	No	0.1	13.7235	0.151899	0.0771605	21	born in village	not during Ebola	not during Ebola	not during Ebola	not during Ebola	Dry season birth	Some primary	1st			4.15318		Believes clinic trans or unsure	during Ebola	0.1	0	0	0	0	0	0	1	0
1070	1	6	Not born at facility	Bassa	No	10.9	6.24518	0.316456	0.287671	24	born in village	not during Ebola	not during Ebola	not during Ebola	not during Ebola	Rainy season birth	Some primary	1st	2	2	-0.0832175	2012	not believe clinic trans	not during Ebola	10	0.9	0	1	1	1	1	1	1
1135	1	43	Born at facility	Bassa	Yes	12.4	6.24518	0.316456	0.168	39	born in village	not during Ebola	not during Ebola	not during Ebola	not during Ebola	Rainy season birth	none	1st	4	4	-0.619751	2011	not believe clinic trans	not during Ebola	10	2.4	0	1	1	0	0	1	1
1196	1	15	Born at facility	English	Yes	24.5	6.24518	0.316456	0.625	37	born in village	not during Ebola	not during Ebola	not during Ebola	not during Ebola	Dry season birth	none	2nd-3rd	4	4	-0.749645	2013	Believes clinic trans or unsure	not during Ebola	10	11	3.5	1	1	1	1	1	1
716	1	2	Born at facility	English	No	18.9	6.24518	0.316456	0.18552	16	NOT born in village	not during Ebola	not during Ebola	not during Ebola	not during Ebola	Dry season birth	Some primary	2nd-3rd			0.204386		not believe clinic trans	during Ebola	10	8.9	0	0	0	0	0	1	0
1253	2	21	Not born at facility	Bassa	Yes	6.2	4.20117	0.390625	0.326316	22	born in village	not during Ebola	not during Ebola	not during Ebola	not during Ebola	Rainy season birth	Some primary	2nd-3rd			0.0983801		Believes clinic trans or unsure	during Ebola	6.2	0	0	0	0	0	0	1	0
346	2	28	Not born at facility	English	Yes	8.3	4.20117	0.390625	0.411765	24	born in village	not during Ebola	not during Ebola	not during Ebola	not during Ebola	Dry season birth	Some primary	2nd-3rd			0.467961		Believes clinic trans or unsure	during Ebola	8.3	0	0	0	0	0	0	1	0
390	1	9	Not born at facility	Bassa	Yes	5.2	6.24518	0.316456	0.913044	23	born in village	not during Ebola	not during Ebola	not during Ebola	not during Ebola	Dry season birth	none	1st			-0.860736		Believes clinic trans or unsure	during Ebola	5.2	0	0	0	0	0	0	1	0
470	2	60	Not born at facility	Bassa	Yes	5.6	4.20117	0.390625	0.28	30	NOT born in village	not during Ebola	not during Ebola	not during Ebola	not during Ebola	Dry season birth	none	1st			1.70764		Believes clinic trans or unsure	during Ebola	5.6	0	0	0	0	0	0	1	0
413	2	64	Born at facility	Bassa	Yes	7.2	4.20117	0.390625	0.333333	30	born in village	not during Ebola	not during Ebola	not during Ebola	not during Ebola	Dry season birth	Some primary	1st			-0.127423		not believe clinic trans	during Ebola	7.2	0	0	0	0	0	0	1	0
1395	2	20	Born at facility	English	Yes	6.2	4.20117	0.390625	0.326316	18	born in village	not during Ebola	not during Ebola	not during Ebola	not during Ebola	Rainy season birth	Some primary	2nd-3rd	1	1	-0.110465	2012	not believe clinic trans	not during Ebola	6.2	0	0	1	1	1	0	1	1
763	3	25	Not born at facility	English	Yes	0.1	13.7235	0.151899	0.212121	33	born in village	not during Ebola	not during Ebola	not during Ebola	not during Ebola	Dry season birth	Some Secondary or more	4th or higher	4	4	0.481147		Believes clinic trans or unsure	not during Ebola	0.1	0	0	1	1	0	0	1	1
1001	1	66	Born at facility	English	Yes	15	6.24518	0.316456	0.653846	13	born in village	not during Ebola	not during Ebola	not during Ebola	not during Ebola	Rainy season birth	none	2nd-3rd			-0.530987		not believe clinic trans	during Ebola	10	5	0	0	0	0	0	1	0
950	3	57	Born at facility	Bassa	Yes	4.4	13.7235	0.151899	0.538462	35	born in village	not during Ebola	not during Ebola	not during Ebola	not during Ebola	Dry season birth	none	4th or higher			-0.584045		Believes clinic trans or unsure	during Ebola	4.4	0	0	0	0	0	0	1	0
112	1	43	Born at facility	Bassa	No	12.4	6.24518	0.316456	0.168	15	born in village	not during Ebola	not during Ebola	not during Ebola	not during Ebola	Rainy season birth	Some primary	1st			0.246942		not believe clinic trans	during Ebola	10	2.4	0	0	0	0	0	1	0
1030	2	28	Born at facility	English	Yes	8.3	4.20117	0.390625	0.411765	24	NOT born in village	not during Ebola	not during Ebola	not during Ebola	not during Ebola	Dry season birth	Some primary	2nd-3rd			0.58858		Believes clinic trans or unsure	not during Ebola	8.3	0	0	0	0	0	0	1	0
676	2	54	Not born at facility	Bassa	Yes	5.1	4.20117	0.390625	0.7	26	born in village	not during Ebola	not during Ebola	not during Ebola	not during Ebola	Dry season birth	Some primary	1st	3	3	-0.231727	2013	not believe clinic trans	not during Ebola	5.1	0	0	1	1	1	1	1	1
169	2	36	Not born at facility	Bassa	Yes	5.8	4.20117	0.390625	0.761905	16	born in village	not during Ebola	not during Ebola	not during Ebola	not during Ebola	Dry season birth	none	1st			-0.860736		Believes clinic trans or unsure	during Ebola	5.8	0	0	0	0	0	0	1	0
408	1	6	Born at facility	English	Yes	10.9	6.24518	0.316456	0.287671	14	NOT born in village	not during Ebola	not during Ebola	not during Ebola	not during Ebola	Dry season birth	none	1st			-0.494946		not believe clinic trans	during Ebola	10	0.9	0	0	0	0	0	1	0
308	3	46	Born at facility	Bassa	Yes	0.1	13.7235	0.151899	0.07	21	born in village	not during Ebola	not during Ebola	not during Ebola	not during Ebola	Dry season birth	Some primary	1st	1	1	0.0189085	2013	not believe clinic trans	not during Ebola	0.1	0	0	1	1	1	1	1	1
530	3	46	Born at facility	Bassa	Yes	0.1	13.7235	0.151899	0.07	33	born in village	not during Ebola	not during Ebola	not during Ebola	not during Ebola	Dry season birth	Some primary	1st	4	4	-0.223356	2013	not believe clinic trans	not during Ebola	0.1	0	0	1	1	1	1	1	1
574	1	51	Not born at facility	Bassa	Yes	16.3	6.24518	0.316456	0.365385	39	born in village	not during Ebola	not during Ebola	not during Ebola	not during Ebola	Dry season birth	none	1st	4	4	0.449371	2013	Believes clinic trans or unsure	not during Ebola	10	6.3	0	1	1	1	1	1	1
1178	3	25	Born at facility	English	Yes	0.1	13.7235	0.151899	0.212121	24	born in village	not during Ebola	not during Ebola	not during Ebola	not during Ebola	Dry season birth	Some primary	1st			0.059857		not believe clinic trans	during Ebola	0.1	0	0	0	0	0	0	1	0
1119	2	24	Not born at facility	Bassa	Yes	6.7	4.20117	0.390625	0.59375	19	NOT born in village	not during Ebola	not during Ebola	not during Ebola	not during Ebola	Rainy season birth	Some primary	2nd-3rd			0.829085		not believe clinic trans	during Ebola	6.7	0	0	0	0	0	0	1	0
791	1	43	Not born at facility	Bassa	No	12.4	6.24518	0.316456	0.168	30	born in village	not during Ebola	not during Ebola	not during Ebola	not during Ebola	Dry season birth	none	4th or higher	3	3	-0.374702	2013	Believes clinic trans or unsure	not during Ebola	10	2.4	0	1	1	1	1	1	1
920	1	45	Not born at facility	Bassa	Yes	20.9	6.24518	0.316456	0.333333	29	born in village	not during Ebola	not during Ebola	not during Ebola	not during Ebola	Rainy season birth	none	2nd-3rd			-0.752947		Believes clinic trans or unsure	during Ebola	10	10.9	0	0	0	0	0	1	0
639	2	24	Not born at facility	Bassa	Yes	6.7	4.20117	0.390625	0.59375	17	born in village	not during Ebola	not during Ebola	not during Ebola	not during Ebola	Rainy season birth	Some primary	2nd-3rd			-0.719883		Believes clinic trans or unsure	during Ebola	6.7	0	0	0	0	0	0	1	0
425	2	38	Not born at facility	English	No	15.9	4.20117	0.390625	0.446808	23	NOT born in village	not during Ebola	not during Ebola	not during Ebola	not during Ebola	Rainy season birth	Some primary	4th or higher			-0.860736		Believes clinic trans or unsure	during Ebola	10	5.9	0	0	0	0	0	1	0
888	2	58	Not born at facility	Bassa	No	19.8	4.20117	0.390625	0.28	27	born in village	not during Ebola	not during Ebola	not during Ebola	not during Ebola	Dry season birth	none	2nd-3rd			0.111103		not believe clinic trans	during Ebola	10	9.8	0	0	0	0	0	1	0
895	2	36	Born at facility	Bassa	Yes	5.8	4.20117	0.390625	0.761905	22	NOT born in village	not during Ebola	not during Ebola	not during Ebola	not during Ebola	Rainy season birth	Some primary	2nd-3rd			-0.860736		Believes clinic trans or unsure	during Ebola	5.8	0	0	0	0	0	0	1	0
1431	2	35	Born at facility	Bassa	Yes	11.4	4.20117	0.390625	0.84	21	born in village	not during Ebola	not during Ebola	not during Ebola	not during Ebola	Dry season birth	none	2nd-3rd			0.394972		Believes clinic trans or unsure	during Ebola	10	1.4	0	0	0	0	0	1	0
435	1	49	Not born at facility	English	Yes	16.9	6.24518	0.316456	0.714286	21	born in village	not during Ebola	not during Ebola	not during Ebola	not during Ebola	Dry season birth	none	1st			-0.860736		Believes clinic trans or unsure	during Ebola	10	6.9	0	0	0	0	0	1	0
159	1	49	Not born at facility	English	Yes	16.9	6.24518	0.316456	0.714286	32	born in village	not during Ebola	not during Ebola	not during Ebola	not during Ebola	Rainy season birth	none	4th or higher		4	-0.613457		Believes clinic trans or unsure	not during Ebola	10	6.9	0	0	1	0	0	1	0
715	2	29	Not born at facility	Bassa	Yes	19.6	4.20117	0.390625	0.62069	33	born in village	not during Ebola	not during Ebola	not during Ebola	not during Ebola	Dry season birth	Some primary	4th or higher	4	4	-0.689267	2011	Believes clinic trans or unsure	not during Ebola	10	9.6	0	1	1	1	0	1	1
950	3	57	Born at facility	Bassa	Yes	4.4	13.7235	0.151899	0.538462	37	born in village	not during Ebola	not during Ebola	not during Ebola	not during Ebola	Rainy season birth	none	4th or higher			-0.584045		Believes clinic trans or unsure	during Ebola	4.4	0	0	0	0	0	0	1	0
344	1	12	Born at facility	English	Yes	19.1	6.24518	0.316456	0.207237	34	NOT born in village	not during Ebola	not during Ebola	not during Ebola	not during Ebola	Dry season birth	none	2nd-3rd			-0.643218		Believes clinic trans or unsure	during Ebola	10	9.1	0	0	0	0	0	1	0
198	1	5	Not born at facility	English	No	29.3	6.24518	0.316456	0.642857	39	born in village	not during Ebola	not during Ebola	not during Ebola	not during Ebola	Dry season birth	Some Secondary or more	1st	4	4	0.772323	2011	not believe clinic trans	not during Ebola	10	11	8.3	1	1	0	0	1	1
1100	2	24	Not born at facility	Bassa	Yes	6.7	4.20117	0.390625	0.59375	20	born in village	not during Ebola	not during Ebola	not during Ebola	not during Ebola	Rainy season birth	Some primary	2nd-3rd			-0.760604		Believes clinic trans or unsure	during Ebola	6.7	0	0	0	0	0	0	1	0
1012	2	54	Born at facility	English	Yes	13.7	4.20117	0.390625	0.7	21	born in village	not during Ebola	not during Ebola	not during Ebola	not during Ebola	Dry season birth	Some primary	2nd-3rd	1	1	-0.50333	2012	Believes clinic trans or unsure	not during Ebola	10	3.7	0	1	1	1	1	1	1
1145	3	40	Born at facility	Bassa	Yes	0.1	13.7235	0.151899	0.308823	25	born in village	not during Ebola	not during Ebola	not during Ebola	not during Ebola	Rainy season birth	none	1st			-0.181971		not believe clinic trans	during Ebola	0.1	0	0	0	0	0	0	1	0
1437	2	32	Not born at facility	Bassa	Yes	10.5	4.20117	0.390625	0.588235	31	born in village	not during Ebola	not during Ebola	not during Ebola	not during Ebola	Dry season birth	none	4th or higher			-0.594162		Believes clinic trans or unsure	during Ebola	10	0.5	0	0	0	0	0	1	0
531	3	17	Born at facility	English	Yes	0.1	13.7235	0.151899	0.196262	28	born in village	not during Ebola	not during Ebola	not during Ebola	not during Ebola	Rainy season birth	Some primary	2nd-3rd		3	0.786179		Believes clinic trans or unsure	not during Ebola	0.1	0	0	0	1	0	0	1	0
1442	2	32	Not born at facility	English	Yes	9.6	4.20117	0.390625	0.588235	.i	born in village	not during Ebola	not during Ebola	not during Ebola	not during Ebola	Dry season birth	Some primary	1st			-0.736169		Believes clinic trans or unsure	during Ebola	9.6	0	0	0	0	0	0	1	0
1191	1	13	Born at facility	English	No	19.1	6.24518	0.316456	0.207237	22	NOT born in village	not during Ebola	not during Ebola	not during Ebola	not during Ebola	Rainy season birth	Some Secondary or more	2nd-3rd			0.512349		Believes clinic trans or unsure	during Ebola	10	9.1	0	0	0	0	0	1	0
716	1	2	Born at facility	English	No	18.9	6.24518	0.316456	0.18552	22	NOT born in village	not during Ebola	not during Ebola	not during Ebola	not during Ebola	Dry season birth	Some primary	2nd-3rd	2	2	0.204386	2012	not believe clinic trans	not during Ebola	10	8.9	0	1	1	1	0	1	1
233	2	61	Born at facility	Bassa	Yes	11.6	4.20117	0.390625	0.809524	20	born in village	not during Ebola	not during Ebola	not during Ebola	not during Ebola	Dry season birth	Some primary	2nd-3rd			-0.181971		Believes clinic trans or unsure	during Ebola	10	1.6	0	0	0	0	0	1	0
295	3	57	Not born at facility	Bassa	Yes	4.4	13.7235	0.151899	0.538462	17	born in village	not during Ebola	not during Ebola	not during Ebola	not during Ebola	Dry season birth	none	2nd-3rd			-0.860736		Believes clinic trans or unsure	during Ebola	4.4	0	0	0	0	0	0	1	0
178	2	59	Born at facility	Bassa	Yes	5.5	4.20117	0.390625	0.65625	35	born in village	not during Ebola	not during Ebola	not during Ebola	not during Ebola	Dry season birth	none	2nd-3rd	4	4	-0.0314194	2012	not believe clinic trans	not during Ebola	5.5	0	0	1	1	1	0	1	1
667	3	48	Born at facility	Bassa	Yes	3.7	13.7235	0.151899	0.52381	29	born in village	not during Ebola	not during Ebola	not during Ebola	not during Ebola	Dry season birth	none	1st			-0.494946			not during Ebola	3.7	0	0	0	0	0	0	1	0
1094	2	36	Not born at facility	Bassa	Yes	5.8	4.20117	0.390625	0.761905	28	born in village	not during Ebola	not during Ebola	not during Ebola	not during Ebola	Dry season birth	none	2nd-3rd			-0.584045		Believes clinic trans or unsure	not during Ebola	5.8	0	0	0	0	0	0	1	0
1027	2	27	Not born at facility	English	No	5.2	4.20117	0.390625	0.75	35	born in village	not during Ebola	not during Ebola	not during Ebola	not during Ebola	Dry season birth	none	2nd-3rd	4	4	0.0819652	2012	not believe clinic trans	not during Ebola	5.2	0	0	1	1	1	1	1	1
1238	2	19	Not born at facility	Bassa	Yes	6.2	4.20117	0.390625	0.326316	25	born in village	not during Ebola	not during Ebola	not during Ebola	not during Ebola	Dry season birth	none	2nd-3rd			0.0191046		not believe clinic trans	during Ebola	6.2	0	0	0	0	0	0	1	0
881	1	70	Born at facility	Bassa	Yes	32.8	6.24518	0.316456	0.486486	30	born in village	not during Ebola	not during Ebola	not during Ebola	not during Ebola	Dry season birth	none	1st			-0.860736		Believes clinic trans or unsure	during Ebola	10	11	11.8	0	0	0	0	1	0
610	3	52	Born at facility	English	Yes	0.1	13.7235	0.151899	0.0771605	20	born in village	not during Ebola	not during Ebola	not during Ebola	not during Ebola	Dry season birth	Some Secondary or more	2nd-3rd	1	1	0.519663		not believe clinic trans	not during Ebola	0.1	0	0	1	1	0	0	1	1
1104	1	50	Born at facility	Bassa	Yes	6.1	6.24518	0.316456	0.4375	15	born in village	not during Ebola	not during Ebola	not during Ebola	not during Ebola	Rainy season birth	none	1st		1	-0.860736		Believes clinic trans or unsure	not during Ebola	6.1	0	0	0	1	0	0	1	0
710	1	70	Not born at facility	English	Yes	32.8	6.24518	0.316456	0.486486	29	born in village	not during Ebola	not during Ebola	not during Ebola	not during Ebola	Rainy season birth	none	4th or higher			-0.311		not believe clinic trans	during Ebola	10	11	11.8	0	0	0	0	1	0
1377	3	34	Born at facility	Bassa	No	3.4	13.7235	0.151899	0.129231	21	born in village	not during Ebola	not during Ebola	not during Ebola	not during Ebola	Rainy season birth	none	2nd-3rd	1	1	0.58858	2013	not believe clinic trans	not during Ebola	3.4	0	0	1	1	1	1	1	1
425	2	38	Not born at facility	Bassa	Yes	15.9	4.20117	0.390625	0.446808	20	NOT born in village	not during Ebola	not during Ebola	not during Ebola	not during Ebola	Rainy season birth	none	1st			-0.860736		Believes clinic trans or unsure	during Ebola	10	5.9	0	0	0	0	0	1	0
197	2	55	Born at facility	Bassa	Yes	18.4	4.20117	0.390625	0.565217	13	born in village	not during Ebola	not during Ebola	not during Ebola	not during Ebola	Rainy season birth	Some primary	2nd-3rd			-0.130861		not believe clinic trans	during Ebola	10	8.4	0	0	0	0	0	1	0
425	2	38	Not born at facility	English	No	15.9	4.20117	0.390625	0.446808	.i	NOT born in village	not during Ebola	not during Ebola	not during Ebola	not during Ebola	Dry season birth	Some primary	1st			-0.860736		Believes clinic trans or unsure	during Ebola	10	5.9	0	0	0	0	0	1	0
77	3	22	Born at facility	Bassa	Yes	0.1	13.7235	0.151899	0.084	21	born in village	not during Ebola	not during Ebola	not during Ebola	not during Ebola	Dry season birth	Some Secondary or more	2nd-3rd	1	1	0.329337		Believes clinic trans or unsure	not during Ebola	0.1	0	0	1	1	0	0	1	1
755	3	25	Born at facility	English	No	0.1	13.7235	0.151899	0.212121	17	born in village	not during Ebola	not during Ebola	not during Ebola	not during Ebola	Dry season birth	Some Secondary or more	1st	1	1	-0.0033166	2012	Believes clinic trans or unsure	not during Ebola	0.1	0	0	1	1	1	0	1	1
791	1	43	Born at facility	Bassa	No	12.4	6.24518	0.316456	0.168	17	born in village	not during Ebola	not during Ebola	not during Ebola	not during Ebola	Rainy season birth	none	2nd-3rd			-0.374702		Believes clinic trans or unsure	during Ebola	10	2.4	0	0	0	0	0	1	0
1268	2	20	Not born at facility	Bassa	Yes	6.2	4.20117	0.390625	0.326316	25	born in village	not during Ebola	not during Ebola	not during Ebola	not during Ebola	Dry season birth	Some primary	4th or higher		2	-0.453309		not believe clinic trans	not during Ebola	6.2	0	0	0	1	0	0	1	0
169	2	36	Born at facility	Bassa	Yes	5.8	4.20117	0.390625	0.761905	.i	born in village	not during Ebola	not during Ebola	not during Ebola	not during Ebola	Dry season birth	none	1st			-0.860736		not believe clinic trans	during Ebola	5.8	0	0	0	0	0	0	1	0
1447	2	35	Born at facility	Bassa	Yes	11.4	4.20117	0.390625	0.84	20	born in village	not during Ebola	not during Ebola	not during Ebola	not during Ebola	Rainy season birth	none	2nd-3rd			-0.860736		not believe clinic trans	during Ebola	10	1.4	0	0	0	0	0	1	0
870	1	43	Not born at facility	Bassa	Yes	12.4	6.24518	0.316456	0.168	30	born in village	not during Ebola	not during Ebola	not during Ebola	not during Ebola	Dry season birth	none	2nd-3rd			0.246817		Believes clinic trans or unsure	during Ebola	10	2.4	0	0	0	0	0	1	0
79	3	68	Born at facility	English	Yes	0.1	13.7235	0.151899	0.145833	.i	born in village	not during Ebola	not during Ebola	not during Ebola	not during Ebola	Rainy season birth	none	1st			-0.354093		Believes clinic trans or unsure	during Ebola	0.1	0	0	0	0	0	0	1	0
683	3	46	Born at facility	English	Yes	0.1	13.7235	0.151899	0.07	30	born in village	not during Ebola	not during Ebola	not during Ebola	not during Ebola	Dry season birth	Some primary	2nd-3rd			0.601063		Believes clinic trans or unsure	during Ebola	0.1	0	0	0	0	0	0	1	0
1143	2	54	Not born at facility	Bassa	Yes	13.7	4.20117	0.390625	0.7	30	born in village	not during Ebola	not during Ebola	not during Ebola	not during Ebola	Dry season birth	none	2nd-3rd			-0.468903		not believe clinic trans	during Ebola	10	3.7	0	0	0	0	0	1	0
934	1	47	Not born at facility	Bassa	No	8	6.24518	0.316456	0.328125	15	born in village	not during Ebola	not during Ebola	not during Ebola	not during Ebola	Dry season birth	none	1st			-0.366129		not believe clinic trans	during Ebola	8	0	0	0	0	0	0	1	0
319	1	66	Born at facility	English	Yes	15	6.24518	0.316456	0.653846	33	born in village	not during Ebola	not during Ebola	not during Ebola	not during Ebola	Dry season birth	Some primary	4th or higher		4	0.22637		not believe clinic trans	not during Ebola	10	5	0	0	1	0	0	1	0
1348	2	20	Not born at facility	Bassa	Yes	6.2	4.20117	0.390625	0.326316	31	born in village	not during Ebola	not during Ebola	not during Ebola	not during Ebola	Dry season birth	none	2nd-3rd			-0.48272		not believe clinic trans	during Ebola	6.2	0	0	0	0	0	0	1	0
607	2	56	Born at facility	English	No	8.6	4.20117	0.390625	0.709677	29	born in village	not during Ebola	not during Ebola	not during Ebola	during Ebola	Rainy season birth	none	2nd-3rd	3	3	-0.685364	2013	not believe clinic trans	not during Ebola	8.6	0	0	1	1	1	1	1	1
669	1	51	Not born at facility	Bassa	Yes	16.3	6.24518	0.316456	0.365385	24	born in village	not during Ebola	not during Ebola	not during Ebola	not during Ebola	Dry season birth	none	4th or higher			-0.127423		Believes clinic trans or unsure	during Ebola	10	6.3	0	0	0	0	0	1	0
229	2	55	Not born at facility	Bassa	Yes	18.4	4.20117	0.390625	0.565217	33	born in village	not during Ebola	not during Ebola	not during Ebola	not during Ebola	Dry season birth	Some primary	4th or higher	4	4	-0.740493	2011	not believe clinic trans	not during Ebola	10	8.4	0	1	1	0	0	1	1
1375	3	34	Born at facility	Bassa	No	3.4	13.7235	0.151899	0.129231	40	born in village	not during Ebola	not during Ebola	not during Ebola	not during Ebola	Dry season birth	none	1st		4	0.421989		Believes clinic trans or unsure	not during Ebola	3.4	0	0	0	1	0	0	1	0
1181	2	56	Not born at facility	Bassa	Yes	8.6	4.20117	0.390625	0.709677	24	born in village	not during Ebola	not during Ebola	not during Ebola	not during Ebola	Rainy season birth	none	2nd-3rd			-0.374702		not believe clinic trans	during Ebola	8.6	0	0	0	0	0	0	1	0
1420	2	35	Not born at facility	English	Yes	11.4	4.20117	0.390625	0.84	22	born in village	not during Ebola	not during Ebola	not during Ebola	not during Ebola	Rainy season birth	Some primary	4th or higher			-0.480088		not believe clinic trans	during Ebola	10	1.4	0	0	0	0	0	1	0
549	1	8	Not born at facility	Bassa	Yes	8.4	6.24518	0.316456	0.35	.i	born in village	not during Ebola	not during Ebola	not during Ebola	not during Ebola	Dry season birth	none	1st			-0.498228		Believes clinic trans or unsure	during Ebola	8.4	0	0	0	0	0	0	1	0
1457	2	32	Not born at facility	Bassa	Yes	10.5	4.20117	0.390625	0.588235	17	born in village	not during Ebola	not during Ebola	not during Ebola	not during Ebola	Dry season birth	Some primary	2nd-3rd			-0.609756		not believe clinic trans	during Ebola	10	0.5	0	0	0	0	0	1	0
1426	2	32	Born at facility	Bassa	Yes	9.6	4.20117	0.390625	0.588235	36	born in village	not during Ebola	not during Ebola	not during Ebola	not during Ebola	Dry season birth	none	2nd-3rd			-0.860736		not believe clinic trans	during Ebola	9.6	0	0	0	0	0	0	1	0
222	1	5	Not born at facility	English	Yes	29.3	6.24518	0.316456	0.642857	26	born in village	not during Ebola	not during Ebola	not during Ebola	not during Ebola	Rainy season birth	none	2nd-3rd	3	3	-0.371628	2013	Believes clinic trans or unsure	not during Ebola	10	11	8.3	1	1	1	1	1	1
1422	2	32	Born at facility	Bassa	Yes	10.5	4.20117	0.390625	0.588235	.i	born in village	not during Ebola	not during Ebola	not during Ebola	not during Ebola	Dry season birth	none	2nd-3rd			-0.499006		not believe clinic trans	during Ebola	10	0.5	0	0	0	0	0	1	0
1396	2	37	Not born at facility	Bassa	Yes	6.9	4.20117	0.390625	0.807692	28	born in village	not during Ebola	not during Ebola	not during Ebola	not during Ebola	Rainy season birth	none	2nd-3rd		3	-0.860736		Believes clinic trans or unsure	not during Ebola	6.9	0	0	0	1	0	0	1	0
396	1	10	Born at facility	English	Yes	24.2	6.24518	0.316456	0.2625	27	NOT born in village	not during Ebola	not during Ebola	not during Ebola	not during Ebola	Rainy season birth	none	2nd-3rd			-0.608792		Believes clinic trans or unsure	during Ebola	10	11	3.2	0	0	0	0	1	0
755	3	25	Not born at facility	English	Yes	0.1	13.7235	0.151899	0.212121	17	NOT born in village	not during Ebola	not during Ebola	not during Ebola	not during Ebola	Dry season birth	Some Secondary or more	1st			-0.0033166		Believes clinic trans or unsure	during Ebola	0.1	0	0	0	0	0	0	1	0
761	1	13	Not born at facility	Bassa	Yes	19.1	6.24518	0.316456	0.207237	25	born in village	not during Ebola	not during Ebola	not during Ebola	not during Ebola	Rainy season birth	Some primary	1st			0.851208		Believes clinic trans or unsure	during Ebola	10	9.1	0	0	0	0	0	1	0
626	2	58	Born at facility	Bassa	Yes	19.8	4.20117	0.390625	0.28	18	born in village	not during Ebola	not during Ebola	not during Ebola	not during Ebola	Rainy season birth	Some primary	1st	1	1	0.493562	2013	Believes clinic trans or unsure	not during Ebola	10	9.8	0	1	1	1	1	1	1
1050	1	50	Born at facility	Bassa	Yes	6.1	6.24518	0.316456	0.4375	27	born in village	not during Ebola	not during Ebola	not during Ebola	not during Ebola	Dry season birth	none	2nd-3rd	3	3	-0.860736	2012	not believe clinic trans	not during Ebola	6.1	0	0	1	1	1	1	1	1
750	1	18	Not born at facility	Bassa	Yes	9.6	6.24518	0.316456	1	19	born in village	not during Ebola	not during Ebola	not during Ebola	not during Ebola	Rainy season birth	none	1st	1	1	-0.473918	2013	Believes clinic trans or unsure	not during Ebola	9.6	0	0	1	1	1	1	1	1
1048	2	56	Not born at facility	English	No	8.6	4.20117	0.390625	0.709677	18	born in village	not during Ebola	not during Ebola	not during Ebola	not during Ebola	Dry season birth	Some primary	1st			-0.578937		not believe clinic trans	during Ebola	8.6	0	0	0	0	0	0	1	0
791	1	43	Born at facility	Bassa	Yes	12.4	6.24518	0.316456	0.168	35	NOT born in village	not during Ebola	not during Ebola	not during Ebola	not during Ebola	Dry season birth	none	2nd-3rd			-0.374702		Believes clinic trans or unsure	during Ebola	10	2.4	0	0	0	0	0	1	0
1320	1	15	Born at facility	Bassa	Yes	24.5	6.24518	0.316456	0.625	19	NOT born in village	not during Ebola	not during Ebola	not during Ebola	not during Ebola	Dry season birth	Some Secondary or more	2nd-3rd			0.0666712		Believes clinic trans or unsure	during Ebola	10	11	3.5	0	0	0	0	1	0
111	2	23	Not born at facility	Bassa	Yes	5.6	4.20117	0.390625	0.583333	.i	born in village	not during Ebola	not during Ebola	not during Ebola	not during Ebola	Dry season birth	none	1st			-0.374702		Believes clinic trans or unsure	during Ebola	5.6	0	0	0	0	0	0	1	0
1031	2	26	Born at facility	Bassa	Yes	11.2	4.20117	0.390625	0.636364	23	born in village	not during Ebola	not during Ebola	not during Ebola	not during Ebola	Dry season birth	none	2nd-3rd			-0.860736		not believe clinic trans	during Ebola	10	1.2	0	0	0	0	0	1	0
595	1	4	Not born at facility	English	Yes	5.6	6.24518	0.316456	0.525	.i	born in village	not during Ebola	not during Ebola	not during Ebola	not during Ebola	Rainy season birth	none	1st			-0.589147		Believes clinic trans or unsure	during Ebola	5.6	0	0	0	0	0	0	1	0
300	3	52	Not born at facility	Bassa	No	0.1	13.7235	0.151899	0.0771605	12	born in village	not during Ebola	not during Ebola	not during Ebola	not during Ebola	Dry season birth	none	1st			1.28781		Believes clinic trans or unsure	during Ebola	0.1	0	0	0	0	0	0	1	0
24	1	14	Born at facility	English	No	19.1	6.24518	0.316456	0.207237	16	born in village	not during Ebola	not during Ebola	not during Ebola	not during Ebola	Dry season birth	none	2nd-3rd			0.358033		Believes clinic trans or unsure	during Ebola	10	9.1	0	0	0	0	0	1	0
584	3	53	Born at facility	English	Yes	0.1	13.7235	0.151899	0.0771605	18	born in village	not during Ebola	not during Ebola	not during Ebola	not during Ebola	Rainy season birth	Some Secondary or more	1st	1	1	2.05412	2013	Believes clinic trans or unsure	not during Ebola	0.1	0	0	1	1	1	1	1	1
856	2	24	Not born at facility	Bassa	Yes	6.7	4.20117	0.390625	0.59375	16	born in village	not during Ebola	not during Ebola	not during Ebola	not during Ebola	Dry season birth	Some primary	2nd-3rd			-0.363669		not believe clinic trans	during Ebola	6.7	0	0	0	0	0	0	1	0
776	2	39	Not born at facility	Bassa	Yes	4.9	4.20117	0.390625	0.375	22	born in village	not during Ebola	not during Ebola	not during Ebola	not during Ebola	Rainy season birth	Some primary	1st	2	2	2.72142	2013	not believe clinic trans	not during Ebola	4.9	0	0	1	1	1	1	1	1
873	2	28	Not born at facility	Bassa	Yes	8.3	4.20117	0.390625	0.411765	31	born in village	not during Ebola	not during Ebola	not during Ebola	not during Ebola	Dry season birth	Some primary	2nd-3rd			-0.473918		not believe clinic trans	during Ebola	8.3	0	0	0	0	0	0	1	0
375	3	53	Born at facility	English	No	0.1	13.7235	0.151899	0.0771605	20	NOT born in village	not during Ebola	not during Ebola	not during Ebola	not during Ebola	Rainy season birth	Some Secondary or more	1st			3.35173			during Ebola	0.1	0	0	0	0	0	0	1	0
178	2	59	Born at facility	Bassa	Yes	5.5	4.20117	0.390625	0.65625	31	born in village	not during Ebola	not during Ebola	not during Ebola	not during Ebola	Rainy season birth	none	1st			-0.0314194		not believe clinic trans	during Ebola	5.5	0	0	0	0	0	0	1	0
344	1	12	Not born at facility	English	Yes	19.1	6.24518	0.316456	0.207237	28	NOT born in village	not during Ebola	not during Ebola	not during Ebola	not during Ebola	Dry season birth	none	1st			-0.643218		Believes clinic trans or unsure	during Ebola	10	9.1	0	0	0	0	0	1	0
94	1	1	Born at facility	English	Yes	20.5	6.24518	0.316456	0.232558	14	NOT born in village	not during Ebola	not during Ebola	not during Ebola	not during Ebola	Rainy season birth	Some Secondary or more	2nd-3rd			1.83863			during Ebola	10	10.5	0	0	0	0	0	1	0
295	3	57	Not born at facility	Bassa	Yes	4.4	13.7235	0.151899	0.538462	24	born in village	not during Ebola	not during Ebola	not during Ebola	not during Ebola	Rainy season birth	none	4th or higher			-0.860736		Believes clinic trans or unsure	during Ebola	4.4	0	0	0	0	0	0	1	0
1442	2	32	Not born at facility	English	Yes	9.6	4.20117	0.390625	0.588235	14	born in village	not during Ebola	not during Ebola	not during Ebola	not during Ebola	Rainy season birth	Some primary	2nd-3rd		1	-0.736169		Believes clinic trans or unsure	not during Ebola	9.6	0	0	0	1	0	0	1	0
846	1	66	Born at facility	English	Yes	15	6.24518	0.316456	0.653846	32	born in village	not during Ebola	not during Ebola	not during Ebola	not during Ebola	Rainy season birth	none	4th or higher	4	4	-0.282345	2013	Believes clinic trans or unsure	not during Ebola	10	5	0	1	1	1	1	1	1
64	1	1	Born at facility	English	Yes	20.5	6.24518	0.316456	0.232558	18	NOT born in village	not during Ebola	not during Ebola	not during Ebola	not during Ebola	Rainy season birth	Some Secondary or more	1st			1.57205		not believe clinic trans	during Ebola	10	10.5	0	0	0	0	0	1	0
404	2	36	Not born at facility	Bassa	Yes	5.8	4.20117	0.390625	0.761905	19	born in village	not during Ebola	not during Ebola	not during Ebola	not during Ebola	Dry season birth	none	1st	1	1	-0.75431	2013	Believes clinic trans or unsure	not during Ebola	5.8	0	0	1	1	1	1	1	1
74	3	17	Born at facility	English	No	0.1	13.7235	0.151899	0.196262	18	NOT born in village	not during Ebola	not during Ebola	not during Ebola	not during Ebola	Rainy season birth	Some primary	2nd-3rd			2.15381		Believes clinic trans or unsure	during Ebola	0.1	0	0	0	0	0	0	1	0
229	2	55	Not born at facility	Bassa	Yes	18.4	4.20117	0.390625	0.565217	28	born in village	not during Ebola	not during Ebola	not during Ebola	not during Ebola	Rainy season birth	Some primary	4th or higher			-0.740493		not believe clinic trans	during Ebola	10	8.4	0	0	0	0	0	1	0
1369	2	20	Born at facility	Bassa	Yes	6.2	4.20117	0.390625	0.326316	35	born in village	not during Ebola	not during Ebola	not during Ebola	not during Ebola	Dry season birth	none	1st			-0.59964		Believes clinic trans or unsure	during Ebola	6.2	0	0	0	0	0	0	1	0
879	2	61	Born at facility	Bassa	Yes	11.6	4.20117	0.390625	0.809524	28	born in village	not during Ebola	not during Ebola	not during Ebola	not during Ebola	Dry season birth	none	1st		3	1.25253		Believes clinic trans or unsure	not during Ebola	10	1.6	0	0	1	0	0	1	0
585	1	50	Born at facility	Bassa	Yes	5.3	6.24518	0.316456	0.4375	25	born in village	not during Ebola	not during Ebola	not during Ebola	not during Ebola	Rainy season birth	none	1st	2	2	-0.394865	2012	Believes clinic trans or unsure	not during Ebola	5.3	0	0	1	1	1	1	1	1
1008	3	53	Born at facility	Bassa	Yes	0.1	13.7235	0.151899	0.0771605	24	born in village	not during Ebola	not during Ebola	not during Ebola	not during Ebola	Rainy season birth	Some primary	1st			-0.574272		not believe clinic trans	during Ebola	0.1	0	0	0	0	0	0	1	0
1309	2	21	Born at facility	English	Yes	6.2	4.20117	0.390625	0.326316	30	born in village	not during Ebola	not during Ebola	not during Ebola	not during Ebola	Rainy season birth	Some Secondary or more	4th or higher			-0.0541823		Believes clinic trans or unsure	during Ebola	6.2	0	0	0	0	0	0	1	0
1091	3	25	Born at facility	Bassa	Yes	0.1	13.7235	0.151899	0.212121	24	born in village	not during Ebola	not during Ebola	not during Ebola	not during Ebola	Dry season birth	Some primary	2nd-3rd	2	2	-0.316447	2013	not believe clinic trans	not during Ebola	0.1	0	0	1	1	1	1	1	1
200	2	54	Not born at facility	Bassa	Yes	5.4	4.20117	0.390625	0.7	22	NOT born in village	not during Ebola	not during Ebola	not during Ebola	not during Ebola	Dry season birth	none	1st			0.0642113		Believes clinic trans or unsure	during Ebola	5.4	0	0	0	0	0	0	1	0
1383	2	20	Not born at facility	Bassa	No	6.2	4.20117	0.390625	0.326316	15	NOT born in village	not during Ebola	not during Ebola	not during Ebola	not during Ebola	Rainy season birth	Some Secondary or more	1st			-0.613457		Believes clinic trans or unsure	during Ebola	6.2	0	0	0	0	0	0	1	0
1341	3	34	Born at facility	English	Yes	3.4	13.7235	0.151899	0.129231	17	NOT born in village	not during Ebola	not during Ebola	not during Ebola	not during Ebola	Dry season birth	none	1st			2.47835		Believes clinic trans or unsure	during Ebola	3.4	0	0	0	0	0	0	1	0
219	2	31	Born at facility	English	Yes	8.2	4.20117	0.390625	0.525	23	born in village	not during Ebola	not during Ebola	not during Ebola	not during Ebola	Rainy season birth	Some primary	4th or higher			-0.0068402		Believes clinic trans or unsure	during Ebola	8.2	0	0	0	0	0	0	1	0
412	1	7	Born at facility	Bassa	Yes	16.1	6.24518	0.316456	0.4	15	born in village	not during Ebola	not during Ebola	not during Ebola	not during Ebola	Rainy season birth	Some primary	1st			-0.629401		Believes clinic trans or unsure	during Ebola	10	6.1	0	0	0	0	0	1	0
559	2	27	Born at facility	Bassa	Yes	5.2	4.20117	0.390625	0.75	33	born in village	not during Ebola	not during Ebola	not during Ebola	not during Ebola	Dry season birth	none	2nd-3rd			0.190636		not believe clinic trans	during Ebola	5.2	0	0	0	0	0	0	1	0
732	2	31	Born at facility	Bassa	Yes	8.2	4.20117	0.390625	0.525	28	born in village	not during Ebola	not during Ebola	not during Ebola	not during Ebola	Dry season birth	none	4th or higher			-0.191007		Believes clinic trans or unsure	during Ebola	8.2	0	0	0	0	0	0	1	0
313	1	13	Born at facility	English	Yes	19.1	6.24518	0.316456	0.207237	33	born in village	not during Ebola	not during Ebola	not during Ebola	not during Ebola	Dry season birth	Some primary	1st	4	4	1.36058	2011	Believes clinic trans or unsure	not during Ebola	10	9.1	0	1	1	0	0	1	1
1371	2	19	Born at facility	Bassa	Yes	6.2	4.20117	0.390625	0.326316	27	born in village	not during Ebola	not during Ebola	not during Ebola	not during Ebola	Dry season birth	Some Secondary or more	4th or higher	3	3	-0.749645	2013		not during Ebola	6.2	0	0	1	1	1	1	1	1
677	1	14	Born at facility	English	Yes	19.1	6.24518	0.316456	0.207237	23	NOT born in village	not during Ebola	not during Ebola	not during Ebola	not during Ebola	Rainy season birth	Some Secondary or more	2nd-3rd		2	1.10059		Believes clinic trans or unsure	not during Ebola	10	9.1	0	0	1	0	0	1	0
1351	2	19	Born at facility	English	Yes	6.2	4.20117	0.390625	0.326316	23	born in village	not during Ebola	not during Ebola	not during Ebola	not during Ebola	Dry season birth	Some primary	4th or higher			0.688202		not believe clinic trans	during Ebola	6.2	0	0	0	0	0	0	1	0
773	2	30	Not born at facility	English	Yes	7.5	4.20117	0.390625	0.85	19	born in village	not during Ebola	not during Ebola	not during Ebola	not during Ebola	Dry season birth	Some primary	2nd-3rd		1	-0.397637		not believe clinic trans	not during Ebola	7.5	0	0	0	1	0	0	1	0
848	1	51	Not born at facility	English	Yes	16.3	6.24518	0.316456	0.365385	23	born in village	not during Ebola	not during Ebola	not during Ebola	not during Ebola	Rainy season birth	none	4th or higher			0.288687		Believes clinic trans or unsure	during Ebola	10	6.3	0	0	0	0	0	1	0
618	1	18	Not born at facility	Bassa	Yes	9.6	6.24518	0.316456	1	26	born in village	not during Ebola	not during Ebola	not during Ebola	not during Ebola	Dry season birth	Some primary	4th or higher			-0.75431		Believes clinic trans or unsure	during Ebola	9.6	0	0	0	0	0	0	1	0
326	3	52	Born at facility	English	No	0.1	13.7235	0.151899	0.0771605	18	born in village	not during Ebola	not during Ebola	not during Ebola	not during Ebola	Dry season birth	Some Secondary or more	1st		1	3.48566		not believe clinic trans	not during Ebola	0.1	0	0	0	1	0	0	1	0
1346	1	15	Not born at facility	Bassa	Yes	24.5	6.24518	0.316456	0.625	13	born in village	not during Ebola	not during Ebola	not during Ebola	not during Ebola	Rainy season birth	none	1st			-0.333065		Believes clinic trans or unsure	during Ebola	10	11	3.5	0	0	0	0	1	0
1063	2	26	Not born at facility	Bassa	Yes	11.2	4.20117	0.390625	0.636364	12	born in village	not during Ebola	not during Ebola	not during Ebola	not during Ebola	Dry season birth	Some primary	4th or higher			0.35291		not believe clinic trans	during Ebola	10	1.2	0	0	0	0	0	1	0
1446	2	35	Born at facility	Bassa	Yes	11.4	4.20117	0.390625	0.84	33	born in village	not during Ebola	not during Ebola	not during Ebola	not during Ebola	Dry season birth	none	2nd-3rd			-0.0512347		not believe clinic trans	not during Ebola	10	1.4	0	0	0	0	0	1	0
1424	1	3	Born at facility	Bassa	Yes	18.9	6.24518	0.316456	0.18552	24	born in village	not during Ebola	not during Ebola	not during Ebola	during Ebola	Rainy season birth	Some primary	1st	2	2	-0.63239	2013	Believes clinic trans or unsure	during Ebola	10	8.9	0	1	1	1	1	1	1
764	2	31	Not born at facility	Bassa	Yes	8.2	4.20117	0.390625	0.525	27	born in village	not during Ebola	not during Ebola	not during Ebola	not during Ebola	Dry season birth	Some primary	1st	3	3	-0.860736	2013	Believes clinic trans or unsure	not during Ebola	8.2	0	0	1	1	1	1	1	1
950	3	57	Born at facility	Bassa	Yes	4.4	13.7235	0.151899	0.538462	27	born in village	not during Ebola	not during Ebola	not during Ebola	not during Ebola	Dry season birth	none	2nd-3rd			-0.584045		Believes clinic trans or unsure	during Ebola	4.4	0	0	0	0	0	0	1	0
586	1	50	Born at facility	Bassa	Yes	6.1	6.24518	0.316456	0.4375	28	born in village	not during Ebola	not during Ebola	not during Ebola	not during Ebola	Dry season birth	none	4th or higher	3	3	-0.752947	2013	not believe clinic trans	not during Ebola	6.1	0	0	1	1	1	1	1	1
320	1	47	Born at facility	Bassa	Yes	8	6.24518	0.316456	0.328125	21	born in village	not during Ebola	not during Ebola	not during Ebola	not during Ebola	Dry season birth	Some primary	2nd-3rd			-0.612094		Believes clinic trans or unsure	during Ebola	8	0	0	0	0	0	0	1	0
79	3	68	Born at facility	English	Yes	0.1	13.7235	0.151899	0.145833	13	born in village	not during Ebola	not during Ebola	not during Ebola	not during Ebola	Dry season birth	none	2nd-3rd			-0.354093		Believes clinic trans or unsure	during Ebola	0.1	0	0	0	0	0	0	1	0
417	1	18	Not born at facility	English	Yes	9.6	6.24518	0.316456	1	39	born in village	not during Ebola	not during Ebola	not during Ebola	not during Ebola	Dry season birth	Some primary	1st	4	4	-0.612094	2013	not believe clinic trans	not during Ebola	9.6	0	0	1	1	1	1	1	1
1480	2	35	Not born at facility	English	Yes	11.4	4.20117	0.390625	0.84	27	born in village	not during Ebola	not during Ebola	not during Ebola	not during Ebola	Dry season birth	Some primary	4th or higher			-0.0378358		not believe clinic trans	during Ebola	10	1.4	0	0	0	0	0	1	0
1482	2	32	Not born at facility	Bassa	Yes	10.5	4.20117	0.390625	0.588235	35	born in village	not during Ebola	not during Ebola	not during Ebola	not during Ebola	Rainy season birth	none	2nd-3rd			-0.75431		Believes clinic trans or unsure	during Ebola	10	0.5	0	0	0	0	0	1	0
48	2	23	Not born at facility	English	No	5.6	4.20117	0.390625	0.583333	27	born in village	not during Ebola	not during Ebola	not during Ebola	not during Ebola	Dry season birth	Some primary	4th or higher	3	3	-0.211784	2012	not believe clinic trans	not during Ebola	5.6	0	0	1	1	1	1	1	1
806	3	62	Not born at facility	English	Yes	2	13.7235	0.151899	0.238636	17	NOT born in village	not during Ebola	not during Ebola	not during Ebola	not during Ebola	Dry season birth	Some Secondary or more	2nd-3rd			0.62348		Believes clinic trans or unsure	during Ebola	2	0	0	0	0	0	0	1	0
1317	3	34	Born at facility	English	Yes	3.4	13.7235	0.151899	0.129231	16	born in village	not during Ebola	not during Ebola	not during Ebola	not during Ebola	Dry season birth	Some primary	1st	1	1	1.15967	2011	Believes clinic trans or unsure	not during Ebola	3.4	0	0	1	1	1	0	1	1
293	2	27	Born at facility	Bassa	Yes	5.2	4.20117	0.390625	0.75	21	born in village	not during Ebola	not during Ebola	not during Ebola	not during Ebola	Rainy season birth	none	2nd-3rd			-0.0809531		Believes clinic trans or unsure	during Ebola	5.2	0	0	0	0	0	0	1	0
571	3	52	Born at facility	English	No	0.1	13.7235	0.151899	0.0771605	23	born in village	not during Ebola	not during Ebola	not during Ebola	not during Ebola	Rainy season birth	Some primary	1st		2	1.417		Believes clinic trans or unsure	not during Ebola	0.1	0	0	0	1	0	0	1	0
1003	2	30	Not born at facility	Bassa	Yes	7.5	4.20117	0.390625	0.85	20	born in village	not during Ebola	not during Ebola	not during Ebola	not during Ebola	Dry season birth	none	1st			-0.604655		not believe clinic trans	during Ebola	7.5	0	0	0	0	0	0	1	0
561	1	49	Not born at facility	Bassa	Yes	14.5	6.24518	0.316456	0.714286	22	born in village	not during Ebola	not during Ebola	not during Ebola	not during Ebola	Dry season birth	none	1st			-0.860736			not during Ebola	10	4.5	0	0	0	0	0	1	0
137	3	22	Born at facility	Bassa	No	0.1	13.7235	0.151899	0.084	18	born in village	not during Ebola	not during Ebola	not during Ebola	not during Ebola	Dry season birth	Some primary	1st			-0.178689		Believes clinic trans or unsure	during Ebola	0.1	0	0	0	0	0	0	1	0
375	3	53	Not born at facility	English	No	0.1	13.7235	0.151899	0.0771605	19	NOT born in village	not during Ebola	not during Ebola	not during Ebola	not during Ebola	Rainy season birth	none	1st			3.35173		Believes clinic trans or unsure	during Ebola	0.1	0	0	0	0	0	0	1	0
870	1	43	Not born at facility	Bassa	Yes	12.4	6.24518	0.316456	0.168	34	born in village	not during Ebola	not during Ebola	not during Ebola	not during Ebola	Dry season birth	none	4th or higher			0.246817		Believes clinic trans or unsure	during Ebola	10	2.4	0	0	0	0	0	1	0
141	1	70	Not born at facility	Bassa	Yes	30.8	6.24518	0.316456	0.486486	20	born in village	not during Ebola	not during Ebola	not during Ebola	not during Ebola	Dry season birth	none	1st			-0.513895		Believes clinic trans or unsure	during Ebola	10	11	9.8	0	0	0	0	1	0
1083	3	25	Born at facility	Bassa	Yes	0.1	13.7235	0.151899	0.212121	23	born in village	not during Ebola	not during Ebola	not during Ebola	not during Ebola	Dry season birth	Some primary	2nd-3rd			0.064872		Believes clinic trans or unsure	during Ebola	0.1	0	0	0	0	0	0	1	0
1323	2	37	Born at facility	Bassa	Yes	6.9	4.20117	0.390625	0.807692	23	born in village	not during Ebola	not during Ebola	not during Ebola	not during Ebola	Rainy season birth	none	4th or higher			-0.860736		Believes clinic trans or unsure	during Ebola	6.9	0	0	0	0	0	0	1	0
1321	2	21	Not born at facility	Bassa	Yes	6.2	4.20117	0.390625	0.326316	23	born in village	not during Ebola	not during Ebola	not during Ebola	not during Ebola	Rainy season birth	Some primary	4th or higher			0.0958707		not believe clinic trans	during Ebola	6.2	0	0	0	0	0	0	1	0
1462	1	3	Not born at facility	English	Yes	18.9	6.24518	0.316456	0.18552	25	born in village	not during Ebola	not during Ebola	not during Ebola	not during Ebola	Rainy season birth	Some primary	1st	2	2	-0.860736	2012	Believes clinic trans or unsure	not during Ebola	10	8.9	0	1	1	1	1	1	1
980	1	4	Born at facility	Bassa	Yes	5.6	6.24518	0.316456	0.525	32	born in village	not during Ebola	not during Ebola	not during Ebola	not during Ebola	Dry season birth	none	1st			0.111103		not believe clinic trans	during Ebola	5.6	0	0	0	0	0	0	1	0
618	1	18	Not born at facility	Bassa	Yes	9.6	6.24518	0.316456	1	22	born in village	not during Ebola	not during Ebola	not during Ebola	not during Ebola	Rainy season birth	Some primary	2nd-3rd			-0.75431		Believes clinic trans or unsure	during Ebola	9.6	0	0	0	0	0	0	1	0
1399	3	42	Born at facility	Bassa	Yes	4.2	13.7235	0.151899	0.55	.i	born in village	not during Ebola	not during Ebola	not during Ebola	not during Ebola	Dry season birth	none	2nd-3rd			-0.250879		Believes clinic trans or unsure	during Ebola	4.2	0	0	0	0	0	0	1	0
532	2	60	Born at facility	English	Yes	5.6	4.20117	0.390625	0.28	29	born in village	not during Ebola	not during Ebola	not during Ebola	not during Ebola	Dry season birth	none	2nd-3rd	3	3	-0.468903		not believe clinic trans	not during Ebola	5.6	0	0	1	1	0	0	1	1
560	1	49	Not born at facility	English	Yes	16.9	6.24518	0.316456	0.714286	16	born in village	not during Ebola	not during Ebola	not during Ebola	not during Ebola	Rainy season birth	none	2nd-3rd	1	1	-0.860736	2012		not during Ebola	10	6.9	0	1	1	1	1	1	1
508	3	53	Not born at facility	English	No	0.1	13.7235	0.151899	0.0771605	26	born in village	not during Ebola	not during Ebola	not during Ebola	not during Ebola	Dry season birth	Some primary	2nd-3rd			4.15318		Believes clinic trans or unsure	not during Ebola	0.1	0	0	0	0	0	0	1	0
669	1	51	Born at facility	Bassa	Yes	16.3	6.24518	0.316456	0.365385	24	born in village	not during Ebola	not during Ebola	not during Ebola	not during Ebola	Dry season birth	none	4th or higher			-0.127423		Believes clinic trans or unsure	during Ebola	10	6.3	0	0	0	0	0	1	0
559	2	27	Born at facility	Bassa	Yes	5.2	4.20117	0.390625	0.75	39	born in village	not during Ebola	not during Ebola	not during Ebola	not during Ebola	Rainy season birth	none	4th or higher	4	4	0.190636		not believe clinic trans	not during Ebola	5.2	0	0	1	1	0	0	1	1
867	1	45	Born at facility	Bassa	Yes	20.9	6.24518	0.316456	0.333333	35	born in village	not during Ebola	not during Ebola	not during Ebola	not during Ebola	Dry season birth	none	1st			-0.367492		Believes clinic trans or unsure	during Ebola	10	10.9	0	0	0	0	0	1	0
733	3	53	Not born at facility	English	Yes	0.1	13.7235	0.151899	0.0771605	20	born in village	not during Ebola	not during Ebola	not during Ebola	not during Ebola	Rainy season birth	none	2nd-3rd			1.83924		Believes clinic trans or unsure	during Ebola	0.1	0	0	0	0	0	0	1	0
135	2	39	Not born at facility	English	Yes	4.9	4.20117	0.390625	0.375	16	born in village	not during Ebola	not during Ebola	not during Ebola	not during Ebola	Rainy season birth	Some Secondary or more	1st	1	1	-0.860736	2013	Believes clinic trans or unsure	not during Ebola	4.9	0	0	1	1	1	1	1	1
162	3	46	Born at facility	English	No	0.1	13.7235	0.151899	0.07	31	born in village	not during Ebola	not during Ebola	not during Ebola	not during Ebola	Rainy season birth	Some primary	4th or higher			-0.243966		not believe clinic trans	during Ebola	0.1	0	0	0	0	0	0	1	0
113	1	66	Not born at facility	English	Yes	17.7	6.24518	0.316456	0.653846	21	born in village	not during Ebola	not during Ebola	not during Ebola	not during Ebola	Dry season birth	none	1st			-0.651231		Believes clinic trans or unsure	during Ebola	10	7.7	0	0	0	0	0	1	0
1174	2	54	Born at facility	English	No	5.4	4.20117	0.390625	0.7	21	NOT born in village	not during Ebola	not during Ebola	not during Ebola	not during Ebola	Dry season birth	none	2nd-3rd			2.03721		Believes clinic trans or unsure	during Ebola	5.4	0	0	0	0	0	0	1	0
1172	1	47	Not born at facility	English	Yes	8	6.24518	0.316456	0.328125	28	born in village	not during Ebola	not during Ebola	not during Ebola	not during Ebola	Dry season birth	none	2nd-3rd			0.288383		Believes clinic trans or unsure	during Ebola	8	0	0	0	0	0	0	1	0
485	1	6	Born at facility	English	No	10.9	6.24518	0.316456	0.287671	16	born in village	not during Ebola	not during Ebola	not during Ebola	not during Ebola	Dry season birth	Some Secondary or more	1st			3.69864		Believes clinic trans or unsure	during Ebola	10	0.9	0	0	0	0	0	1	0
1467	2	32	Not born at facility	English	Yes	10.5	4.20117	0.390625	0.588235	22	born in village	not during Ebola	not during Ebola	not during Ebola	not during Ebola	Rainy season birth	Some primary	2nd-3rd	2	2	-0.615926	2012	Believes clinic trans or unsure	not during Ebola	10	0.5	0	1	1	1	0	1	1
1081	1	1	Not born at facility	Bassa	No	20.5	6.24518	0.316456	0.232558	28	born in village	not during Ebola	not during Ebola	not during Ebola	not during Ebola	Dry season birth	none	1st	3	3	-0.749645	2013	not believe clinic trans	not during Ebola	10	10.5	0	1	1	1	1	1	1
1052	1	9	Born at facility	English	Yes	5.2	6.24518	0.316456	0.913044	21	NOT born in village	not during Ebola	not during Ebola	not during Ebola	not during Ebola	Rainy season birth	none	2nd-3rd			-0.136176		Believes clinic trans or unsure	during Ebola	5.2	0	0	0	0	0	0	1	0
356	3	53	Born at facility	English	Yes	0.1	13.7235	0.151899	0.0771605	36	born in village	not during Ebola	not during Ebola	not during Ebola	not during Ebola	Dry season birth	none	1st			1.81863		not believe clinic trans	during Ebola	0.1	0	0	0	0	0	0	1	0
1457	2	32	Not born at facility	Bassa	Yes	10.5	4.20117	0.390625	0.588235	14	born in village	not during Ebola	not during Ebola	not during Ebola	not during Ebola	Rainy season birth	Some primary	1st			-0.609756		not believe clinic trans	during Ebola	10	0.5	0	0	0	0	0	1	0
1196	1	15	Born at facility	English	Yes	24.5	6.24518	0.316456	0.625	14	born in village	not during Ebola	not during Ebola	not during Ebola	not during Ebola	Dry season birth	none	1st		1	-0.749645		Believes clinic trans or unsure	not during Ebola	10	11	3.5	0	1	0	0	1	0
768	1	69	Born at facility	English	Yes	15.6	6.24518	0.316456	0.590909	18	born in village	not during Ebola	not during Ebola	not during Ebola	not during Ebola	Rainy season birth	Some primary	1st			-0.0512664		not believe clinic trans	during Ebola	10	5.6	0	0	0	0	0	1	0
182	1	13	Born at facility	English	Yes	19.1	6.24518	0.316456	0.207237	23	born in village	not during Ebola	not during Ebola	not during Ebola	not during Ebola	Dry season birth	none	1st			-0.0003889		Believes clinic trans or unsure	during Ebola	10	9.1	0	0	0	0	0	1	0
1111	3	68	Not born at facility	English	No	0.1	13.7235	0.151899	0.145833	16	born in village	not during Ebola	not during Ebola	not during Ebola	not during Ebola	Rainy season birth	Some primary	1st			-0.609756		Believes clinic trans or unsure	during Ebola	0.1	0	0	0	0	0	0	1	0
1036	1	43	Not born at facility	Bassa	Yes	12.4	6.24518	0.316456	0.168	33	born in village	not during Ebola	not during Ebola	not during Ebola	not during Ebola	Rainy season birth	none	1st	4	4	-0.752947	2012	not believe clinic trans	not during Ebola	10	2.4	0	1	1	1	0	1	1
54	2	30	Not born at facility	English	Yes	7.5	4.20117	0.390625	0.85	30	born in village	not during Ebola	not during Ebola	not during Ebola	not during Ebola	Rainy season birth	Some primary	2nd-3rd			-0.406105		not believe clinic trans	during Ebola	7.5	0	0	0	0	0	0	1	0
1071	1	7	Not born at facility	Bassa	No	16.1	6.24518	0.316456	0.4	27	born in village	not during Ebola	not during Ebola	not during Ebola	not during Ebola	Dry season birth	Some Secondary or more	2nd-3rd	3	3	-0.689267	2013	Believes clinic trans or unsure	not during Ebola	10	6.1	0	1	1	1	1	1	1
1172	1	47	Born at facility	English	Yes	8	6.24518	0.316456	0.328125	22	born in village	not during Ebola	not during Ebola	not during Ebola	not during Ebola	Dry season birth	none	2nd-3rd			0.288383		Believes clinic trans or unsure	during Ebola	8	0	0	0	0	0	0	1	0
773	2	30	Not born at facility	Bassa	Yes	7.5	4.20117	0.390625	0.85	27	born in village	not during Ebola	not during Ebola	not during Ebola	not during Ebola	Dry season birth	none	2nd-3rd			-0.397637		Believes clinic trans or unsure	during Ebola	7.5	0	0	0	0	0	0	1	0
978	1	43	Born at facility	Bassa	Yes	12.4	6.24518	0.316456	0.168	33	born in village	not during Ebola	not during Ebola	not during Ebola	not during Ebola	Dry season birth	Some primary	4th or higher			-0.493213		Believes clinic trans or unsure	during Ebola	10	2.4	0	0	0	0	0	1	0
721	2	58	Not born at facility	Bassa	Yes	19.8	4.20117	0.390625	0.28	18	born in village	not during Ebola	not during Ebola	not during Ebola	not during Ebola	Rainy season birth	Some Secondary or more	1st		1	-0.116929		not believe clinic trans	not during Ebola	10	9.8	0	0	1	0	0	1	0
984	1	45	Not born at facility	Bassa	Yes	20.9	6.24518	0.316456	0.333333	34	NOT born in village	not during Ebola	not during Ebola	not during Ebola	during Ebola	Rainy season birth	Some primary	1st	4	4	-0.498228	2013	not believe clinic trans	not during Ebola	10	10.9	0	1	1	1	1	1	1
219	2	31	Not born at facility	Bassa	No	8.2	4.20117	0.390625	0.525	23	born in village	not during Ebola	not during Ebola	not during Ebola	not during Ebola	Dry season birth	none	4th or higher			-0.0068402		Believes clinic trans or unsure	during Ebola	8.2	0	0	0	0	0	0	1	0
865	1	67	Born at facility	English	No	5.6	6.24518	0.316456	0.416667	21	born in village	not during Ebola	not during Ebola	not during Ebola	not during Ebola	Rainy season birth	Some primary	2nd-3rd			0.453277		Believes clinic trans or unsure	during Ebola	5.6	0	0	0	0	0	0	1	0
1354	3	34	Not born at facility	English	Yes	3.4	13.7235	0.151899	0.129231	12	born in village	not during Ebola	not during Ebola	not during Ebola	not during Ebola	Rainy season birth	none	4th or higher			3.90116		Believes clinic trans or unsure	during Ebola	3.4	0	0	0	0	0	0	1	0
569	2	30	Not born at facility	Bassa	Yes	7.5	4.20117	0.390625	0.85	37	born in village	not during Ebola	not during Ebola	not during Ebola	not during Ebola	Dry season birth	Some primary	4th or higher	4	4	-0.203461	2012	Believes clinic trans or unsure	not during Ebola	7.5	0	0	1	1	1	0	1	1
862	2	24	Born at facility	Bassa	Yes	6.7	4.20117	0.390625	0.59375	18	born in village	not during Ebola	not during Ebola	not during Ebola	not during Ebola	Rainy season birth	none	1st			-0.388519		not believe clinic trans	during Ebola	6.7	0	0	0	0	0	0	1	0
775	2	23	Not born at facility	Bassa	Yes	5.6	4.20117	0.390625	0.583333	28	born in village	not during Ebola	not during Ebola	not during Ebola	not during Ebola	Dry season birth	none	2nd-3rd		3	-0.634066		not believe clinic trans	not during Ebola	5.6	0	0	0	1	0	0	1	0
1346	1	15	Not born at facility	Bassa	Yes	24.5	6.24518	0.316456	0.625	25	born in village	not during Ebola	not during Ebola	not during Ebola	not during Ebola	Dry season birth	none	4th or higher			-0.333065		Believes clinic trans or unsure	during Ebola	10	11	3.5	0	0	0	0	1	0
77	3	22	Born at facility	Bassa	Yes	0.1	13.7235	0.151899	0.084	24	born in village	not during Ebola	not during Ebola	not during Ebola	not during Ebola	Dry season birth	Some Secondary or more	4th or higher	2	2	0.329337	2013	Believes clinic trans or unsure	not during Ebola	0.1	0	0	1	1	1	1	1	1
899	2	31	Not born at facility	Bassa	Yes	8.2	4.20117	0.390625	0.525	13	born in village	not during Ebola	not during Ebola	not during Ebola	not during Ebola	Rainy season birth	none	1st			-0.860736		Believes clinic trans or unsure	during Ebola	8.2	0	0	0	0	0	0	1	0
1122	2	38	Born at facility	Bassa	Yes	15.9	4.20117	0.390625	0.446808	32	born in village	not during Ebola	not during Ebola	not during Ebola	not during Ebola	Rainy season birth	none	1st	4	4	0.644332	2012	Believes clinic trans or unsure	not during Ebola	10	5.9	0	1	1	1	1	1	1
146	1	69	Not born at facility	Bassa	Yes	15.6	6.24518	0.316456	0.590909	16	born in village	not during Ebola	not during Ebola	not during Ebola	not during Ebola	Dry season birth	Some primary	1st			-0.73		Believes clinic trans or unsure	during Ebola	10	5.6	0	0	0	0	0	1	0
609	3	48	Not born at facility	Bassa	Yes	4.1	13.7235	0.151899	0.52381	28	born in village	not during Ebola	not during Ebola	not during Ebola	not during Ebola	Dry season birth	none	2nd-3rd			-0.151663		Believes clinic trans or unsure	during Ebola	4.1	0	0	0	0	0	0	1	0
715	2	29	Not born at facility	Bassa	Yes	19.6	4.20117	0.390625	0.62069	22	born in village	not during Ebola	not during Ebola	not during Ebola	not during Ebola	Rainy season birth	Some primary	1st			-0.689267		Believes clinic trans or unsure	during Ebola	10	9.6	0	0	0	0	0	1	0
914	3	62	Born at facility	English	Yes	2	13.7235	0.151899	0.238636	22	born in village	not during Ebola	not during Ebola	not during Ebola	not during Ebola	Rainy season birth	Some primary	2nd-3rd			0.338827		Believes clinic trans or unsure	during Ebola	2	0	0	0	0	0	0	1	0
1104	1	50	Born at facility	Bassa	Yes	6.1	6.24518	0.316456	0.4375	15	born in village	not during Ebola	not during Ebola	not during Ebola	not during Ebola	Rainy season birth	none	1st		1	-0.860736		Believes clinic trans or unsure	not during Ebola	6.1	0	0	0	1	0	0	1	0
1465	2	35	Born at facility	Bassa	Yes	11.4	4.20117	0.390625	0.84	28	born in village	not during Ebola	not during Ebola	not during Ebola	not during Ebola	Dry season birth	none	1st			-0.473918		Believes clinic trans or unsure	during Ebola	10	1.4	0	0	0	0	0	1	0
176	3	62	Born at facility	English	Yes	2	13.7235	0.151899	0.238636	15	born in village	not during Ebola	not during Ebola	not during Ebola	not during Ebola	Rainy season birth	Some primary	4th or higher			0.494817		Believes clinic trans or unsure	during Ebola	2	0	0	0	0	0	0	1	0
765	1	70	Not born at facility	Bassa	Yes	32.8	6.24518	0.316456	0.486486	23	born in village	not during Ebola	not during Ebola	not during Ebola	not during Ebola	Dry season birth	Some primary	4th or higher	2	2	-0.487735	2013	not believe clinic trans	not during Ebola	10	11	11.8	1	1	1	1	1	1
443	2	24	Not born at facility	Bassa	Yes	6.7	4.20117	0.390625	0.59375	28	born in village	not during Ebola	not during Ebola	not during Ebola	not during Ebola	Rainy season birth	Some primary	2nd-3rd		3	-0.231108		Believes clinic trans or unsure	not during Ebola	6.7	0	0	0	1	0	0	1	0
1321	2	21	Born at facility	Bassa	Yes	6.2	4.20117	0.390625	0.326316	26	born in village	not during Ebola	not during Ebola	not during Ebola	not during Ebola	Dry season birth	none	4th or higher	3	3	0.0958707	2013	not believe clinic trans	not during Ebola	6.2	0	0	1	1	1	1	1	1
1116	1	8	Not born at facility	Bassa	Yes	8.4	6.24518	0.316456	0.35	26	born in village	not during Ebola	not during Ebola	not during Ebola	not during Ebola	Rainy season birth	none	1st			-0.252767		Believes clinic trans or unsure	during Ebola	8.4	0	0	0	0	0	0	1	0
1035	3	68	Born at facility	English	Yes	0.1	13.7235	0.151899	0.145833	20	born in village	not during Ebola	not during Ebola	not during Ebola	not during Ebola	Rainy season birth	none	2nd-3rd			0.892719		not believe clinic trans	during Ebola	0.1	0	0	0	0	0	0	1	0
31	2	29	Not born at facility	Bassa	Yes	19.6	4.20117	0.390625	0.62069	23	born in village	not during Ebola	not during Ebola	not during Ebola	not during Ebola	Dry season birth	none	2nd-3rd			-0.860736		not believe clinic trans	during Ebola	10	9.6	0	0	0	0	0	1	0
648	1	13	Born at facility	English	Yes	19.1	6.24518	0.316456	0.207237	22	NOT born in village	not during Ebola	not during Ebola	not during Ebola	not during Ebola	Dry season birth	none	2nd-3rd			0.937512		Believes clinic trans or unsure	during Ebola	10	9.1	0	0	0	0	0	1	0
757	2	64	Born at facility	English	Yes	7.2	4.20117	0.390625	0.333333	20	born in village	not during Ebola	not during Ebola	not during Ebola	not during Ebola	Rainy season birth	Some Secondary or more	1st			-0.0875182		not believe clinic trans	during Ebola	7.2	0	0	0	0	0	0	1	0
1071	1	7	Born at facility	Bassa	No	16.1	6.24518	0.316456	0.4	19	born in village	not during Ebola	not during Ebola	not during Ebola	not during Ebola	Dry season birth	Some Secondary or more	1st			-0.689267		Believes clinic trans or unsure	during Ebola	10	6.1	0	0	0	0	0	1	0
249	2	28	Not born at facility	English	Yes	8.3	4.20117	0.390625	0.411765	18	born in village	not during Ebola	not during Ebola	not during Ebola	not during Ebola	Dry season birth	Some primary	1st			-0.0440885		not believe clinic trans	during Ebola	8.3	0	0	0	0	0	0	1	0
1169	1	14	Born at facility	Bassa	Yes	19.1	6.24518	0.316456	0.207237	20	born in village	not during Ebola	not during Ebola	not during Ebola	not during Ebola	Dry season birth	Some Secondary or more	1st	1	1	0.456721	2013	not believe clinic trans	not during Ebola	10	9.1	0	1	1	1	1	1	1
721	2	58	Not born at facility	Bassa	Yes	19.8	4.20117	0.390625	0.28	19	born in village	not during Ebola	not during Ebola	not during Ebola	not during Ebola	Rainy season birth	Some Secondary or more	2nd-3rd	1	1	-0.116929	2011	not believe clinic trans	not during Ebola	10	9.8	0	1	1	0	0	1	1
1235	2	19	Not born at facility	English	Yes	6.2	4.20117	0.390625	0.326316	15	born in village	not during Ebola	not during Ebola	not during Ebola	not during Ebola	Rainy season birth	Some primary	1st			0.0327253		not believe clinic trans	during Ebola	6.2	0	0	0	0	0	0	1	0
447	2	60	Not born at facility	Bassa	Yes	5.6	4.20117	0.390625	0.28	24	born in village	not during Ebola	not during Ebola	not during Ebola	not during Ebola	Rainy season birth	none	2nd-3rd			-0.584045		Believes clinic trans or unsure	during Ebola	5.6	0	0	0	0	0	0	1	0
532	2	60	Born at facility	English	Yes	5.6	4.20117	0.390625	0.28	15	born in village	not during Ebola	not during Ebola	not during Ebola	not during Ebola	Dry season birth	none	1st			-0.468903		not believe clinic trans	during Ebola	5.6	0	0	0	0	0	0	1	0
1365	3	33	Born at facility	Bassa	Yes	3.4	13.7235	0.151899	0.129231	29	NOT born in village	not during Ebola	not during Ebola	not during Ebola	not during Ebola	Dry season birth	Some Secondary or more	2nd-3rd		3	-0.226639			not during Ebola	3.4	0	0	0	1	0	0	1	0
640	3	52	Born at facility	English	Yes	0.1	13.7235	0.151899	0.0771605	15	born in village	not during Ebola	not during Ebola	not during Ebola	not during Ebola	Rainy season birth	Some Secondary or more	1st		1	1.78546		Believes clinic trans or unsure	not during Ebola	0.1	0	0	0	1	0	0	1	0
176	3	62	Not born at facility	English	Yes	2	13.7235	0.151899	0.238636	19	born in village	not during Ebola	not during Ebola	not during Ebola	not during Ebola	Dry season birth	Some primary	4th or higher		1	0.494817		Believes clinic trans or unsure	not during Ebola	2	0	0	0	1	0	0	1	0
765	1	70	Born at facility	Bassa	Yes	32.8	6.24518	0.316456	0.486486	17	born in village	not during Ebola	not during Ebola	not during Ebola	not during Ebola	Rainy season birth	Some primary	2nd-3rd			-0.487735		not believe clinic trans	during Ebola	10	11	11.8	0	0	0	0	1	0
713	1	67	Not born at facility	Bassa	Yes	5.6	6.24518	0.316456	0.416667	27	born in village	not during Ebola	not during Ebola	not during Ebola	not during Ebola	Dry season birth	Some Secondary or more	1st			-0.117279		not believe clinic trans	during Ebola	5.6	0	0	0	0	0	0	1	0
208	2	55	Born at facility	English	Yes	18.4	4.20117	0.390625	0.565217	36	born in village	not during Ebola	not during Ebola	not during Ebola	not during Ebola	Rainy season birth	none	4th or higher	4	4	-0.493213	2011	Believes clinic trans or unsure	not during Ebola	10	8.4	0	1	1	0	0	1	1
461	2	59	Not born at facility	English	No	5.5	4.20117	0.390625	0.65625	16	born in village	not during Ebola	not during Ebola	not during Ebola	not during Ebola	Dry season birth	Some primary	1st			-0.067		not believe clinic trans	during Ebola	5.5	0	0	0	0	0	0	1	0
1178	3	25	Born at facility	English	Yes	0.1	13.7235	0.151899	0.212121	38	born in village	not during Ebola	not during Ebola	not during Ebola	not during Ebola	Dry season birth	Some primary	4th or higher			0.059857		not believe clinic trans	during Ebola	0.1	0	0	0	0	0	0	1	0
917	3	48	Born at facility	English	Yes	4.1	13.7235	0.151899	0.52381	25	NOT born in village	not during Ebola	not during Ebola	not during Ebola	not during Ebola	Rainy season birth	Some Secondary or more	2nd-3rd			1.87379		not believe clinic trans	during Ebola	4.1	0	0	0	0	0	0	1	0
1231	2	41	Not born at facility	Bassa	Yes	9.4	4.20117	0.390625	0.913044	15	born in village	not during Ebola	not during Ebola	not during Ebola	not during Ebola	Dry season birth	none	1st			0.246942		Believes clinic trans or unsure	during Ebola	9.4	0	0	0	0	0	0	1	0
107	1	50	Born at facility	Bassa	Yes	6.1	6.24518	0.316456	0.4375	27	born in village	not during Ebola	not during Ebola	not during Ebola	not during Ebola	Dry season birth	none	2nd-3rd	3	3	-0.438053	2013	Believes clinic trans or unsure	not during Ebola	6.1	0	0	1	1	1	1	1	1
1354	3	34	Not born at facility	English	Yes	3.4	13.7235	0.151899	0.129231	20	born in village	not during Ebola	not during Ebola	not during Ebola	not during Ebola	Rainy season birth	none	4th or higher			3.90116		Believes clinic trans or unsure	during Ebola	3.4	0	0	0	0	0	0	1	0
126	1	47	Born at facility	Bassa	Yes	8	6.24518	0.316456	0.328125	14	born in village	not during Ebola	not during Ebola	not during Ebola	not during Ebola	Dry season birth	Some primary	2nd-3rd			-0.388519		Believes clinic trans or unsure	during Ebola	8	0	0	0	0	0	0	1	0
1480	2	35	Not born at facility	English	Yes	11.4	4.20117	0.390625	0.84	28	born in village	not during Ebola	not during Ebola	not during Ebola	not during Ebola	Rainy season birth	Some primary	4th or higher			-0.0378358		not believe clinic trans	during Ebola	10	1.4	0	0	0	0	0	1	0
159	1	49	Not born at facility	English	Yes	16.9	6.24518	0.316456	0.714286	35	born in village	not during Ebola	not during Ebola	not during Ebola	not during Ebola	Dry season birth	none	4th or higher	4	4	-0.613457	2012	Believes clinic trans or unsure	not during Ebola	10	6.9	0	1	1	1	0	1	1
415	3	68	Born at facility	English	Yes	0.1	13.7235	0.151899	0.145833	18	born in village	not during Ebola	not during Ebola	not during Ebola	not during Ebola	Rainy season birth	Some Secondary or more	1st			2.35438		Believes clinic trans or unsure	during Ebola	0.1	0	0	0	0	0	0	1	0
610	3	52	Not born at facility	English	Yes	0.1	13.7235	0.151899	0.0771605	22	born in village	not during Ebola	not during Ebola	not during Ebola	not during Ebola	Dry season birth	Some Secondary or more	1st			0.519663		Believes clinic trans or unsure	during Ebola	0.1	0	0	0	0	0	0	1	0
18	2	59	Not born at facility	Bassa	Yes	5.5	4.20117	0.390625	0.65625	29	born in village	not during Ebola	not during Ebola	not during Ebola	not during Ebola	Rainy season birth	Some primary	4th or higher			-0.740493		Believes clinic trans or unsure	during Ebola	5.5	0	0	0	0	0	0	1	0
459	1	65	Not born at facility	Bassa	Yes	5.4	6.24518	0.316456	0.782609	31	born in village	not during Ebola	not during Ebola	not during Ebola	not during Ebola	Dry season birth	none	4th or higher			-0.613457			during Ebola	5.4	0	0	0	0	0	0	1	0
1294	2	21	Born at facility	Bassa	Yes	6.2	4.20117	0.390625	0.326316	21	born in village	not during Ebola	not during Ebola	not during Ebola	not during Ebola	Dry season birth	Some primary	2nd-3rd	1	1	1.38726		not believe clinic trans	not during Ebola	6.2	0	0	1	1	0	0	1	1
137	3	22	Born at facility	Bassa	No	0.1	13.7235	0.151899	0.084	24	born in village	not during Ebola	not during Ebola	not during Ebola	not during Ebola	Dry season birth	Some primary	4th or higher			-0.178689		Believes clinic trans or unsure	during Ebola	0.1	0	0	0	0	0	0	1	0
999	3	53	Born at facility	Bassa	Yes	0.1	13.7235	0.151899	0.0771605	18	born in village	not during Ebola	not during Ebola	not during Ebola	not during Ebola	Dry season birth	none	1st			-0.192119		not believe clinic trans	during Ebola	0.1	0	0	0	0	0	0	1	0
141	1	70	Not born at facility	Bassa	Yes	30.8	6.24518	0.316456	0.486486	31	born in village	not during Ebola	not during Ebola	not during Ebola	not during Ebola	Dry season birth	none	4th or higher		3	-0.513895		Believes clinic trans or unsure	not during Ebola	10	11	9.8	0	1	0	0	1	0
1258	2	19	Not born at facility	Bassa	Yes	6.2	4.20117	0.390625	0.326316	33	born in village	not during Ebola	not during Ebola	not during Ebola	not during Ebola	Rainy season birth	Some primary	2nd-3rd			-0.354093		Believes clinic trans or unsure	during Ebola	6.2	0	0	0	0	0	0	1	0
1339	3	42	Not born at facility	Bassa	Yes	4.2	13.7235	0.151899	0.55	20	born in village	not during Ebola	not during Ebola	not during Ebola	not during Ebola	Dry season birth	none	4th or higher			0.302165		Believes clinic trans or unsure	during Ebola	4.2	0	0	0	0	0	0	1	0
415	3	68	Born at facility	English	Yes	0.1	13.7235	0.151899	0.145833	24	born in village	not during Ebola	not during Ebola	not during Ebola	not during Ebola	Dry season birth	Some Secondary or more	4th or higher			2.35438		Believes clinic trans or unsure	during Ebola	0.1	0	0	0	0	0	0	1	0
1456	1	3	Born at facility	English	Yes	18.9	6.24518	0.316456	0.18552	21	NOT born in village	not during Ebola	not during Ebola	not during Ebola	not during Ebola	Dry season birth	Some Secondary or more	2nd-3rd	1	1	-0.604655		Believes clinic trans or unsure	not during Ebola	10	8.9	0	1	1	0	0	1	1
32	2	56	Born at facility	English	No	8.6	4.20117	0.390625	0.709677	24	born in village	not during Ebola	not during Ebola	not during Ebola	not during Ebola	Rainy season birth	Some primary	2nd-3rd	2	2	0.120203	2012	not believe clinic trans	not during Ebola	8.6	0	0	1	1	1	0	1	1
219	2	31	Not born at facility	Bassa	No	8.2	4.20117	0.390625	0.525	32	born in village	not during Ebola	not during Ebola	not during Ebola	not during Ebola	Dry season birth	none	4th or higher			-0.0068402		Believes clinic trans or unsure	not during Ebola	8.2	0	0	0	0	0	0	1	0
648	1	13	Born at facility	English	Yes	19.1	6.24518	0.316456	0.207237	17	NOT born in village	not during Ebola	not during Ebola	not during Ebola	not during Ebola	Rainy season birth	none	1st			0.937512		Believes clinic trans or unsure	during Ebola	10	9.1	0	0	0	0	0	1	0
283	2	38	Not born at facility	Bassa	Yes	15.9	4.20117	0.390625	0.446808	21	born in village	not during Ebola	not during Ebola	not during Ebola	not during Ebola	Dry season birth	none	1st			-0.860736		Believes clinic trans or unsure	during Ebola	10	5.9	0	0	0	0	0	1	0
110	2	59	Not born at facility	Bassa	Yes	5.5	4.20117	0.390625	0.65625	22	born in village	not during Ebola	not during Ebola	not during Ebola	not during Ebola	Dry season birth	Some primary	2nd-3rd	2	2	0.822505	2011	not believe clinic trans	not during Ebola	5.5	0	0	1	1	0	0	1	1
176	3	62	Born at facility	English	Yes	2	13.7235	0.151899	0.238636	14	NOT born in village	not during Ebola	not during Ebola	not during Ebola	not during Ebola	Rainy season birth	Some primary	1st			0.494817		Believes clinic trans or unsure	during Ebola	2	0	0	0	0	0	0	1	0
639	2	24	Born at facility	Bassa	Yes	6.7	4.20117	0.390625	0.59375	23	born in village	not during Ebola	not during Ebola	not during Ebola	not during Ebola	Rainy season birth	Some primary	4th or higher	2	2	-0.719883	2012	Believes clinic trans or unsure	not during Ebola	6.7	0	0	1	1	1	1	1	1
884	3	57	Born at facility	Bassa	Yes	4.4	13.7235	0.151899	0.538462	13	born in village	not during Ebola	not during Ebola	not during Ebola	not during Ebola	Dry season birth	none	1st			-0.367492		not believe clinic trans	during Ebola	4.4	0	0	0	0	0	0	1	0
1317	3	34	Not born at facility	English	Yes	3.4	13.7235	0.151899	0.129231	21	born in village	not during Ebola	not during Ebola	not during Ebola	not during Ebola	Rainy season birth	Some Secondary or more	2nd-3rd			1.15967			during Ebola	3.4	0	0	0	0	0	0	1	0
786	1	10	Born at facility	English	Yes	24.2	6.24518	0.316456	0.2625	21	NOT born in village	not during Ebola	not during Ebola	not during Ebola	not during Ebola	Dry season birth	Some Secondary or more	1st			-0.23579		Believes clinic trans or unsure	during Ebola	10	11	3.2	0	0	0	0	1	0
1302	2	20	Born at facility	Bassa	Yes	6.2	4.20117	0.390625	0.326316	16	born in village	not during Ebola	not during Ebola	not during Ebola	not during Ebola	Dry season birth	Some primary	1st	1	1	-0.46458	2011	Believes clinic trans or unsure	not during Ebola	6.2	0	0	1	1	1	0	1	1
1265	2	20	Born at facility	Bassa	Yes	6.2	4.20117	0.390625	0.326316	28	born in village	not during Ebola	not during Ebola	not during Ebola	not during Ebola	Dry season birth	Some primary	2nd-3rd	3	3	-0.453309	2013	Believes clinic trans or unsure	not during Ebola	6.2	0	0	1	1	1	1	1	1
115	1	12	Born at facility	Bassa	Yes	19.1	6.24518	0.316456	0.207237	32	born in village	not during Ebola	not during Ebola	not during Ebola	not during Ebola	Rainy season birth	none	1st		4	-0.250022		not believe clinic trans	not during Ebola	10	9.1	0	0	1	0	0	1	0
612	1	67	Born at facility	English	Yes	5.6	6.24518	0.316456	0.416667	17	born in village	not during Ebola	not during Ebola	not during Ebola	not during Ebola	Rainy season birth	Some primary	1st	1	1	1.80476	2013	Believes clinic trans or unsure	not during Ebola	5.6	0	0	1	1	1	1	1	1
159	1	49	Not born at facility	English	Yes	16.9	6.24518	0.316456	0.714286	22	born in village	not during Ebola	not during Ebola	not during Ebola	not during Ebola	Dry season birth	none	2nd-3rd			-0.613457		Believes clinic trans or unsure	during Ebola	10	6.9	0	0	0	0	0	1	0
853	3	57	Born at facility	English	Yes	4.4	13.7235	0.151899	0.538462	32	born in village	not during Ebola	not during Ebola	not during Ebola	not during Ebola	Rainy season birth	none	4th or higher	4	4	-0.0765611	2011	Believes clinic trans or unsure	not during Ebola	4.4	0	0	1	1	0	0	1	1
964	2	30	Not born at facility	English	No	7.5	4.20117	0.390625	0.85	22	born in village	not during Ebola	not during Ebola	not during Ebola	not during Ebola	Rainy season birth	none	1st			-0.574272		not believe clinic trans	during Ebola	7.5	0	0	0	0	0	0	1	0
967	2	31	Not born at facility	Bassa	Yes	8.2	4.20117	0.390625	0.525	21	born in village	not during Ebola	not during Ebola	not during Ebola	not during Ebola	Dry season birth	Some primary	2nd-3rd	1	1	-0.382122	2011	not believe clinic trans	not during Ebola	8.2	0	0	1	1	1	0	1	1
455	3	46	Born at facility	Bassa	Yes	0.1	13.7235	0.151899	0.07	21	born in village	not during Ebola	not during Ebola	not during Ebola	not during Ebola	Dry season birth	Some primary	1st			0.498995		not believe clinic trans	during Ebola	0.1	0	0	0	0	0	0	1	0
618	1	18	Not born at facility	Bassa	Yes	9.6	6.24518	0.316456	1	29	born in village	not during Ebola	not during Ebola	not during Ebola	not during Ebola	Rainy season birth	Some primary	4th or higher	3	3	-0.75431	2011	Believes clinic trans or unsure	not during Ebola	9.6	0	0	1	1	0	0	1	1
1070	1	6	Born at facility	Bassa	Yes	10.9	6.24518	0.316456	0.287671	23	born in village	not during Ebola	not during Ebola	not during Ebola	not during Ebola	Rainy season birth	Some Secondary or more	1st	2	2	-0.0832175	2012	Believes clinic trans or unsure	not during Ebola	10	0.9	0	1	1	1	1	1	1
120	1	45	Not born at facility	Bassa	Yes	20.9	6.24518	0.316456	0.333333	20	born in village	not during Ebola	not during Ebola	not during Ebola	not during Ebola	Dry season birth	Some primary	2nd-3rd	1	1	-0.75431	2013	Believes clinic trans or unsure	not during Ebola	10	10.9	0	1	1	1	1	1	1
859	2	29	Not born at facility	Bassa	Yes	19.6	4.20117	0.390625	0.62069	13	born in village	not during Ebola	not during Ebola	not during Ebola	not during Ebola	Dry season birth	none	1st			-0.252681		not believe clinic trans	during Ebola	10	9.6	0	0	0	0	0	1	0
1359	2	37	Not born at facility	Bassa	Yes	6.9	4.20117	0.390625	0.807692	.i	born in village	not during Ebola	not during Ebola	not during Ebola	not during Ebola	Rainy season birth	none	2nd-3rd			-0.860736		not believe clinic trans	during Ebola	6.9	0	0	0	0	0	0	1	0
1093	2	38	Not born at facility	Bassa	Yes	15.9	4.20117	0.390625	0.446808	23	born in village	not during Ebola	not during Ebola	not during Ebola	not during Ebola	Rainy season birth	none	2nd-3rd			-0.860736		not believe clinic trans	during Ebola	10	5.9	0	0	0	0	0	1	0
1452	2	32	Not born at facility	English	Yes	10.5	4.20117	0.390625	0.588235	32	born in village	not during Ebola	not during Ebola	not during Ebola	not during Ebola	Rainy season birth	none	4th or higher	4	4	-0.219301	2012	not believe clinic trans	not during Ebola	10	0.5	0	1	1	1	0	1	1
1417	1	44	Not born at facility	Bassa	Yes	12.4	6.24518	0.316456	0.168	18	born in village	not during Ebola	not during Ebola	not during Ebola	not during Ebola	Dry season birth	none	1st			-0.48307		Believes clinic trans or unsure	during Ebola	10	2.4	0	0	0	0	0	1	0
1189	2	55	Born at facility	Bassa	Yes	18.4	4.20117	0.390625	0.565217	.i	born in village	not during Ebola	not during Ebola	not during Ebola	not during Ebola	Rainy season birth	none	2nd-3rd			-0.50333		Believes clinic trans or unsure	during Ebola	10	8.4	0	0	0	0	0	1	0
470	2	60	Not born at facility	Bassa	Yes	5.6	4.20117	0.390625	0.28	35	NOT born in village	not during Ebola	not during Ebola	not during Ebola	not during Ebola	Dry season birth	none	2nd-3rd	4	4	1.70764	2013	Believes clinic trans or unsure	not during Ebola	5.6	0	0	1	1	1	1	1	1
424	2	60	Born at facility	Bassa	Yes	5.6	4.20117	0.390625	0.28	16	born in village	not during Ebola	not during Ebola	not during Ebola	not during Ebola	Rainy season birth	none	1st			-0.613457		Believes clinic trans or unsure	during Ebola	5.6	0	0	0	0	0	0	1	0
630	1	4	Not born at facility	English	Yes	5.6	6.24518	0.316456	0.525	19	born in village	not during Ebola	not during Ebola	not during Ebola	not during Ebola	Dry season birth	Some primary	1st			-0.309486		Believes clinic trans or unsure	during Ebola	5.6	0	0	0	0	0	0	1	0
152	2	63	Not born at facility	Bassa	Yes	10	4.20117	0.390625	0.48	31	born in village	not during Ebola	not during Ebola	not during Ebola	not during Ebola	Rainy season birth	Some primary	1st	3	3	-0.282374	2012		not during Ebola	10	0	0	1	1	1	1	1	1
589	2	58	Not born at facility	Bassa	Yes	19.8	4.20117	0.390625	0.28	.i	born in village	not during Ebola	not during Ebola	not during Ebola	not during Ebola	Dry season birth	none	2nd-3rd			0.490104		Believes clinic trans or unsure	during Ebola	10	9.8	0	0	0	0	0	1	0
856	2	24	Not born at facility	Bassa	Yes	6.7	4.20117	0.390625	0.59375	29	born in village	not during Ebola	not during Ebola	not during Ebola	not during Ebola	Dry season birth	Some primary	4th or higher			-0.363669		not believe clinic trans	during Ebola	6.7	0	0	0	0	0	0	1	0
883	3	17	Not born at facility	Bassa	No	0.1	13.7235	0.151899	0.196262	28	NOT born in village	not during Ebola	not during Ebola	not during Ebola	not during Ebola	Dry season birth	none	4th or higher			0.683807		Believes clinic trans or unsure	during Ebola	0.1	0	0	0	0	0	0	1	0
618	1	18	Not born at facility	Bassa	Yes	9.6	6.24518	0.316456	1	32	born in village	not during Ebola	not during Ebola	not during Ebola	not during Ebola	Dry season birth	Some primary	4th or higher	4	4	-0.75431	2013	Believes clinic trans or unsure	not during Ebola	9.6	0	0	1	1	1	1	1	1
197	2	55	Born at facility	Bassa	Yes	18.4	4.20117	0.390625	0.565217	14	born in village	not during Ebola	not during Ebola	not during Ebola	not during Ebola	Rainy season birth	Some primary	2nd-3rd			-0.130861		not believe clinic trans	during Ebola	10	8.4	0	0	0	0	0	1	0
56	1	4	Not born at facility	English	Yes	5.6	6.24518	0.316456	0.525	23	born in village	not during Ebola	not during Ebola	not during Ebola	not during Ebola	Dry season birth	none	1st			-0.513993		Believes clinic trans or unsure	during Ebola	5.6	0	0	0	0	0	0	1	0
1431	2	35	Born at facility	Bassa	Yes	11.4	4.20117	0.390625	0.84	18	born in village	not during Ebola	not during Ebola	not during Ebola	not during Ebola	Rainy season birth	none	1st			0.394972		Believes clinic trans or unsure	during Ebola	10	1.4	0	0	0	0	0	1	0
539	1	67	Not born at facility	English	Yes	5.6	6.24518	0.316456	0.416667	32	born in village	not during Ebola	not during Ebola	not during Ebola	not during Ebola	Rainy season birth	none	2nd-3rd			0.185621		Believes clinic trans or unsure	during Ebola	5.6	0	0	0	0	0	0	1	0
558	3	25	Born at facility	Bassa	Yes	0.1	13.7235	0.151899	0.212121	27	born in village	not during Ebola	not during Ebola	not during Ebola	not during Ebola	Rainy season birth	Some primary	2nd-3rd	3	3	0.208129	2012	Believes clinic trans or unsure	not during Ebola	0.1	0	0	1	1	1	0	1	1
486	1	6	Born at facility	English	No	10.9	6.24518	0.316456	0.287671	17	born in village	not during Ebola	not during Ebola	not during Ebola	not during Ebola	Rainy season birth	Some primary	1st			1.84501		not believe clinic trans	during Ebola	10	0.9	0	0	0	0	0	1	0
515	2	36	Not born at facility	Bassa	Yes	5.8	4.20117	0.390625	0.761905	19	born in village	not during Ebola	not during Ebola	not during Ebola	not during Ebola	Rainy season birth	none	1st			-0.548414		Believes clinic trans or unsure	during Ebola	5.8	0	0	0	0	0	0	1	0
739	3	62	Born at facility	Bassa	Yes	2	13.7235	0.151899	0.238636	35	born in village	not during Ebola	not during Ebola	not during Ebola	not during Ebola	Dry season birth	none	4th or higher			-0.147545		not believe clinic trans	not during Ebola	2	0	0	0	0	0	0	1	0
987	2	23	Born at facility	Bassa	Yes	5.6	4.20117	0.390625	0.583333	18	NOT born in village	not during Ebola	not during Ebola	not during Ebola	not during Ebola	Rainy season birth	Some primary	1st	1	1	-0.366129	2013	not believe clinic trans	not during Ebola	5.6	0	0	1	1	1	1	1	1
219	2	31	Not born at facility	Bassa	No	8.2	4.20117	0.390625	0.525	19	born in village	not during Ebola	not during Ebola	not during Ebola	not during Ebola	Rainy season birth	none	2nd-3rd			-0.0068402		Believes clinic trans or unsure	during Ebola	8.2	0	0	0	0	0	0	1	0
1469	2	32	Not born at facility	Bassa	Yes	10.5	4.20117	0.390625	0.588235	29	born in village	not during Ebola	not during Ebola	not during Ebola	not during Ebola	Dry season birth	none	2nd-3rd	3	3	-0.281839	2011	not believe clinic trans	not during Ebola	10	0.5	0	1	1	0	0	1	1
1131	3	40	Born at facility	Bassa	Yes	0.1	13.7235	0.151899	0.308823	29	born in village	not during Ebola	not during Ebola	not during Ebola	not during Ebola	Dry season birth	none	1st			-0.0512347		Believes clinic trans or unsure	during Ebola	0.1	0	0	0	0	0	0	1	0
1043	1	18	Not born at facility	Bassa	No	9.6	6.24518	0.316456	1	27	NOT born in village	not during Ebola	not during Ebola	not during Ebola	not during Ebola	Rainy season birth	Some primary	4th or higher			-0.604655		Believes clinic trans or unsure	during Ebola	9.6	0	0	0	0	0	0	1	0
905	2	24	Born at facility	English	No	6.7	4.20117	0.390625	0.59375	29	born in village	not during Ebola	not during Ebola	not during Ebola	not during Ebola	Rainy season birth	Some primary	2nd-3rd			-0.165257		not believe clinic trans	during Ebola	6.7	0	0	0	0	0	0	1	0
219	2	31	Born at facility	English	Yes	8.2	4.20117	0.390625	0.525	19	born in village	not during Ebola	not during Ebola	not during Ebola	not during Ebola	Rainy season birth	Some primary	2nd-3rd			-0.0068402		Believes clinic trans or unsure	during Ebola	8.2	0	0	0	0	0	0	1	0
349	2	61	Born at facility	Bassa	Yes	11.6	4.20117	0.390625	0.809524	40	born in village	not during Ebola	not during Ebola	not during Ebola	not during Ebola	Dry season birth	none	1st			-0.161362		not believe clinic trans	not during Ebola	10	1.6	0	0	0	0	0	1	0
1437	2	32	Not born at facility	Bassa	Yes	10.5	4.20117	0.390625	0.588235	25	born in village	not during Ebola	not during Ebola	not during Ebola	not during Ebola	Rainy season birth	none	2nd-3rd			-0.594162		Believes clinic trans or unsure	during Ebola	10	0.5	0	0	0	0	0	1	0
99	2	30	Not born at facility	Bassa	Yes	7.5	4.20117	0.390625	0.85	18	born in village	not during Ebola	not during Ebola	not during Ebola	not during Ebola	Rainy season birth	Some primary	2nd-3rd		1	-0.860736		Believes clinic trans or unsure	not during Ebola	7.5	0	0	0	1	0	0	1	0
798	2	59	Born at facility	Bassa	Yes	5.5	4.20117	0.390625	0.65625	31	born in village	not during Ebola	not during Ebola	not during Ebola	not during Ebola	Dry season birth	none	1st	3	3	0.586778	2012		not during Ebola	5.5	0	0	1	1	1	0	1	1
405	2	23	Not born at facility	English	Yes	5.6	4.20117	0.390625	0.583333	27	born in village	not during Ebola	not during Ebola	not during Ebola	not during Ebola	Dry season birth	none	2nd-3rd	3	3	-0.860736	2013	Believes clinic trans or unsure	not during Ebola	5.6	0	0	1	1	1	1	1	1
1008	3	53	Born at facility	Bassa	Yes	0.1	13.7235	0.151899	0.0771605	36	born in village	not during Ebola	not during Ebola	not during Ebola	not during Ebola	Rainy season birth	Some primary	4th or higher	4	4	-0.574272	2011	not believe clinic trans	not during Ebola	0.1	0	0	1	1	0	0	1	1
773	2	30	Born at facility	Bassa	Yes	7.5	4.20117	0.390625	0.85	24	born in village	not during Ebola	not during Ebola	not during Ebola	not during Ebola	Rainy season birth	none	1st			-0.397637		Believes clinic trans or unsure	during Ebola	7.5	0	0	0	0	0	0	1	0
1174	2	54	Born at facility	English	No	5.4	4.20117	0.390625	0.7	17	NOT born in village	not during Ebola	not during Ebola	not during Ebola	not during Ebola	Dry season birth	none	1st			2.03721		Believes clinic trans or unsure	during Ebola	5.4	0	0	0	0	0	0	1	0
1204	2	31	Not born at facility	Bassa	Yes	8.2	4.20117	0.390625	0.525	24	born in village	not during Ebola	not during Ebola	not during Ebola	not during Ebola	Dry season birth	Some primary	4th or higher		2	-0.59964		not believe clinic trans	not during Ebola	8.2	0	0	0	1	0	0	1	0
1450	2	32	Born at facility	Bassa	Yes	10.5	4.20117	0.390625	0.588235	17	born in village	not during Ebola	not during Ebola	not during Ebola	not during Ebola	Rainy season birth	Some primary	1st			-0.749645		not believe clinic trans	during Ebola	10	0.5	0	0	0	0	0	1	0
375	3	53	Born at facility	English	No	0.1	13.7235	0.151899	0.0771605	24	NOT born in village	not during Ebola	not during Ebola	not during Ebola	not during Ebola	Rainy season birth	Some Secondary or more	2nd-3rd	2	2	3.35173	2011		not during Ebola	0.1	0	0	1	1	0	0	1	1
830	1	65	Born at facility	Bassa	Yes	5.2	6.24518	0.316456	0.782609	23	NOT born in village	not during Ebola	not during Ebola	not during Ebola	not during Ebola	Dry season birth	Some primary	4th or higher			-0.860736		Believes clinic trans or unsure	during Ebola	5.2	0	0	0	0	0	0	1	0
440	1	65	Born at facility	English	Yes	5.2	6.24518	0.316456	0.782609	29	born in village	not during Ebola	not during Ebola	not during Ebola	not during Ebola	Dry season birth	Some Secondary or more	2nd-3rd			-0.118849		Believes clinic trans or unsure	during Ebola	5.2	0	0	0	0	0	0	1	0
1435	2	19	Not born at facility	Bassa	Yes	6.2	4.20117	0.390625	0.326316	14	born in village	not during Ebola	not during Ebola	not during Ebola	not during Ebola	Rainy season birth	none	1st			-0.860736		Believes clinic trans or unsure	during Ebola	6.2	0	0	0	0	0	0	1	0
506	3	46	Born at facility	Bassa	No	0.1	13.7235	0.151899	0.07	23	born in village	not during Ebola	not during Ebola	not during Ebola	not during Ebola	Rainy season birth	Some primary	2nd-3rd		2	-0.860736		Believes clinic trans or unsure	not during Ebola	0.1	0	0	0	1	0	0	1	0
1225	2	41	Not born at facility	Bassa	Yes	9.4	4.20117	0.390625	0.913044	26	born in village	not during Ebola	not during Ebola	not during Ebola	not during Ebola	Dry season birth	none	1st	3	3	-0.59964	2013	Believes clinic trans or unsure	not during Ebola	9.4	0	0	1	1	1	1	1	1
555	1	5	Not born at facility	English	Yes	29.3	6.24518	0.316456	0.642857	20	NOT born in village	not during Ebola	not during Ebola	not during Ebola	not during Ebola	Rainy season birth	Some Secondary or more	2nd-3rd	1	1	-0.0970688	2012	Believes clinic trans or unsure	not during Ebola	10	11	8.3	1	1	1	0	1	1
772	1	45	Not born at facility	Bassa	Yes	20.9	6.24518	0.316456	0.333333	.i	born in village	not during Ebola	not during Ebola	not during Ebola	not during Ebola	Rainy season birth	Some primary	1st			-0.346882		Believes clinic trans or unsure	during Ebola	10	10.9	0	0	0	0	0	1	0
679	2	60	Born at facility	English	Yes	5.6	4.20117	0.390625	0.28	21	NOT born in village	not during Ebola	not during Ebola	not during Ebola	not during Ebola	Dry season birth	Some Secondary or more	1st			-0.0623797		Believes clinic trans or unsure	during Ebola	5.6	0	0	0	0	0	0	1	0
425	2	38	Born at facility	English	No	15.9	4.20117	0.390625	0.446808	12	NOT born in village	not during Ebola	not during Ebola	not during Ebola	not during Ebola	Dry season birth	Some primary	2nd-3rd			-0.860736		Believes clinic trans or unsure	during Ebola	10	5.9	0	0	0	0	0	1	0
437	2	60	Born at facility	Bassa	Yes	5.6	4.20117	0.390625	0.28	17	born in village	not during Ebola	not during Ebola	not during Ebola	not during Ebola	Rainy season birth	Some primary	2nd-3rd	1	1	-0.201197	2011	Believes clinic trans or unsure	not during Ebola	5.6	0	0	1	1	0	0	1	1
1480	2	35	Not born at facility	English	Yes	11.4	4.20117	0.390625	0.84	18	born in village	not during Ebola	not during Ebola	not during Ebola	not during Ebola	Dry season birth	Some primary	1st			-0.0378358		not believe clinic trans	during Ebola	10	1.4	0	0	0	0	0	1	0
24	1	14	Born at facility	English	No	19.1	6.24518	0.316456	0.207237	21	born in village	not during Ebola	not during Ebola	not during Ebola	not during Ebola	Rainy season birth	none	2nd-3rd	1	1	0.358033	2013	Believes clinic trans or unsure	not during Ebola	10	9.1	0	1	1	1	1	1	1
637	1	6	Not born at facility	English	Yes	10.9	6.24518	0.316456	0.287671	25	born in village	not during Ebola	not during Ebola	not during Ebola	not during Ebola	Dry season birth	Some primary	2nd-3rd			0.270085		Believes clinic trans or unsure	during Ebola	10	0.9	0	0	0	0	0	1	0
1366	2	41	Not born at facility	Bassa	Yes	9.4	4.20117	0.390625	0.913044	21	born in village	not during Ebola	not during Ebola	not during Ebola	not during Ebola	Dry season birth	none	2nd-3rd			-0.512909		not believe clinic trans	during Ebola	9.4	0	0	0	0	0	0	1	0
829	1	18	Not born at facility	English	No	9.6	6.24518	0.316456	1	30	NOT born in village	not during Ebola	not during Ebola	not during Ebola	not during Ebola	Dry season birth	Some primary	2nd-3rd			-0.463802		Believes clinic trans or unsure	during Ebola	9.6	0	0	0	0	0	0	1	0
710	1	70	Born at facility	English	Yes	32.8	6.24518	0.316456	0.486486	36	born in village	not during Ebola	not during Ebola	not during Ebola	not during Ebola	Rainy season birth	none	4th or higher	4	4	-0.311	2012	not believe clinic trans	not during Ebola	10	11	11.8	1	1	1	1	1	1
1320	1	15	Born at facility	Bassa	Yes	24.5	6.24518	0.316456	0.625	23	NOT born in village	not during Ebola	not during Ebola	not during Ebola	not during Ebola	Rainy season birth	Some primary	2nd-3rd			0.0666712		Believes clinic trans or unsure	during Ebola	10	11	3.5	0	0	0	0	1	0
618	1	18	Not born at facility	Bassa	Yes	9.6	6.24518	0.316456	1	25	born in village	not during Ebola	not during Ebola	not during Ebola	not during Ebola	Rainy season birth	Some primary	2nd-3rd			-0.75431		Believes clinic trans or unsure	during Ebola	9.6	0	0	0	0	0	0	1	0
1281	2	41	Not born at facility	Bassa	Yes	9.4	4.20117	0.390625	0.913044	26	born in village	not during Ebola	not during Ebola	not during Ebola	not during Ebola	Dry season birth	none	4th or higher			-0.180933		Believes clinic trans or unsure	during Ebola	9.4	0	0	0	0	0	0	1	0
390	1	9	Not born at facility	Bassa	Yes	5.2	6.24518	0.316456	0.913044	29	born in village	not during Ebola	not during Ebola	not during Ebola	not during Ebola	Dry season birth	none	2nd-3rd		3	-0.860736		Believes clinic trans or unsure	not during Ebola	5.2	0	0	0	1	0	0	1	0
219	2	31	Not born at facility	Bassa	No	8.2	4.20117	0.390625	0.525	.i	born in village	not during Ebola	not during Ebola	not during Ebola	not during Ebola	Dry season birth	none	1st			-0.0068402		Believes clinic trans or unsure	during Ebola	8.2	0	0	0	0	0	0	1	0
213	3	48	Born at facility	Bassa	Yes	4.1	13.7235	0.151899	0.52381	37	born in village	not during Ebola	not during Ebola	not during Ebola	not during Ebola	Rainy season birth	none	1st	4	4	-0.0049899	2013	not believe clinic trans	not during Ebola	4.1	0	0	1	1	1	1	1	1
187	1	70	Not born at facility	Bassa	Yes	32.8	6.24518	0.316456	0.486486	16	born in village	not during Ebola	not during Ebola	not during Ebola	not during Ebola	Rainy season birth	none	2nd-3rd	1	1	-0.498228	2012	not believe clinic trans	not during Ebola	10	11	11.8	1	1	1	1	1	1
606	3	17	Born at facility	English	Yes	0.1	13.7235	0.151899	0.196262	29	born in village	not during Ebola	not during Ebola	not during Ebola	not during Ebola	Dry season birth	none	1st			-0.103113		Believes clinic trans or unsure	during Ebola	0.1	0	0	0	0	0	0	1	0
154	1	4	Born at facility	English	Yes	5.6	6.24518	0.316456	0.525	31	born in village	not during Ebola	not during Ebola	not during Ebola	not during Ebola	Rainy season birth	Some primary	2nd-3rd	3	3	-0.27289	2011	Believes clinic trans or unsure	not during Ebola	5.6	0	0	1	1	1	0	1	1
582	2	64	Not born at facility	Bassa	Yes	7.2	4.20117	0.390625	0.333333	21	born in village	not during Ebola	not during Ebola	not during Ebola	not during Ebola	Dry season birth	none	2nd-3rd			-0.574578		Believes clinic trans or unsure	during Ebola	7.2	0	0	0	0	0	0	1	0
870	1	43	Born at facility	Bassa	Yes	12.4	6.24518	0.316456	0.168	36	born in village	not during Ebola	not during Ebola	not during Ebola	not during Ebola	Rainy season birth	none	4th or higher			0.246817		Believes clinic trans or unsure	during Ebola	10	2.4	0	0	0	0	0	1	0
915	1	14	Born at facility	English	No	19.1	6.24518	0.316456	0.207237	17	NOT born in village	not during Ebola	not during Ebola	not during Ebola	not during Ebola	Rainy season birth	Some Secondary or more	1st			0.446257		Believes clinic trans or unsure	during Ebola	10	9.1	0	0	0	0	0	1	0
1232	3	42	Not born at facility	Bassa	Yes	4.2	13.7235	0.151899	0.55	15	born in village	not during Ebola	not during Ebola	not during Ebola	not during Ebola	Rainy season birth	none	4th or higher			-0.113034		not believe clinic trans	during Ebola	4.2	0	0	0	0	0	0	1	0
1369	2	20	Not born at facility	Bassa	Yes	6.2	4.20117	0.390625	0.326316	37	born in village	not during Ebola	not during Ebola	not during Ebola	not during Ebola	Dry season birth	none	2nd-3rd			-0.59964		Believes clinic trans or unsure	during Ebola	6.2	0	0	0	0	0	0	1	0
1216	1	11	Born at facility	English	Yes	16	6.24518	0.316456	0.2	38	born in village	not during Ebola	not during Ebola	not during Ebola	not during Ebola	Dry season birth	Some primary	4th or higher			-0.406362		Believes clinic trans or unsure	during Ebola	10	6	0	0	0	0	0	1	0
732	2	31	Not born at facility	Bassa	Yes	8.2	4.20117	0.390625	0.525	25	born in village	not during Ebola	not during Ebola	not during Ebola	not during Ebola	Dry season birth	none	4th or higher			-0.191007		Believes clinic trans or unsure	during Ebola	8.2	0	0	0	0	0	0	1	0
307	1	8	Born at facility	Bassa	Yes	8.4	6.24518	0.316456	0.35	24	born in village	not during Ebola	not during Ebola	not during Ebola	not during Ebola	Dry season birth	Some primary	1st	2	2	0.111103	2012		not during Ebola	8.4	0	0	1	1	1	1	1	1
912	3	57	Not born at facility	Bassa	No	4.4	13.7235	0.151899	0.538462	28	born in village	not during Ebola	not during Ebola	not during Ebola	not during Ebola	Dry season birth	none	2nd-3rd			-0.157693		Believes clinic trans or unsure	during Ebola	4.4	0	0	0	0	0	0	1	0
916	3	25	Not born at facility	Bassa	Yes	0.1	13.7235	0.151899	0.212121	20	NOT born in village	not during Ebola	not during Ebola	not during Ebola	not during Ebola	Dry season birth	none	1st			-0.473918		Believes clinic trans or unsure	during Ebola	0.1	0	0	0	0	0	0	1	0
1057	2	39	Not born at facility	English	No	4.9	4.20117	0.390625	0.375	17	NOT born in village	not during Ebola	not during Ebola	not during Ebola	not during Ebola	Rainy season birth	Some primary	2nd-3rd			-0.740493		Believes clinic trans or unsure	during Ebola	4.9	0	0	0	0	0	0	1	0
900	3	68	Not born at facility	English	Yes	0.1	13.7235	0.151899	0.145833	15	born in village	not during Ebola	not during Ebola	not during Ebola	not during Ebola	Rainy season birth	Some primary	1st			-0.594162			during Ebola	0.1	0	0	0	0	0	0	1	0
73	3	53	Born at facility	English	No	0.1	13.7235	0.151899	0.0771605	21	NOT born in village	not during Ebola	not during Ebola	not during Ebola	not during Ebola	Dry season birth	Some Secondary or more	1st			2.02875		not believe clinic trans	during Ebola	0.1	0	0	0	0	0	0	1	0
848	1	51	Born at facility	English	Yes	16.3	6.24518	0.316456	0.365385	26	born in village	not during Ebola	not during Ebola	not during Ebola	not during Ebola	Dry season birth	none	4th or higher			0.288687		Believes clinic trans or unsure	during Ebola	10	6.3	0	0	0	0	0	1	0
1358	3	34	Born at facility	English	Yes	3.4	13.7235	0.151899	0.129231	32	born in village	not during Ebola	not during Ebola	not during Ebola	not during Ebola	Rainy season birth	Some Secondary or more	1st			2.26354		Believes clinic trans or unsure	during Ebola	3.4	0	0	0	0	0	0	1	0
816	2	26	Born at facility	English	No	11.2	4.20117	0.390625	0.636364	32	born in village	not during Ebola	not during Ebola	not during Ebola	not during Ebola	Rainy season birth	none	1st		4	-0.319574		not believe clinic trans	not during Ebola	10	1.2	0	0	1	0	0	1	0
627	3	57	Born at facility	English	No	4.4	13.7235	0.151899	0.538462	16	born in village	not during Ebola	not during Ebola	not during Ebola	not during Ebola	Rainy season birth	none	1st	1	1	-0.685364	2012	not believe clinic trans	not during Ebola	4.4	0	0	1	1	1	0	1	1
116	1	66	Born at facility	English	Yes	15	6.24518	0.316456	0.653846	21	born in village	not during Ebola	not during Ebola	not during Ebola	not during Ebola	Dry season birth	Some primary	2nd-3rd			-0.651231		not believe clinic trans	during Ebola	10	5	0	0	0	0	0	1	0
1351	2	19	Not born at facility	English	Yes	6.2	4.20117	0.390625	0.326316	16	born in village	not during Ebola	not during Ebola	not during Ebola	not during Ebola	Dry season birth	Some primary	2nd-3rd			0.688202		not believe clinic trans	during Ebola	6.2	0	0	0	0	0	0	1	0
229	2	55	Born at facility	Bassa	Yes	18.4	4.20117	0.390625	0.565217	24	born in village	not during Ebola	not during Ebola	not during Ebola	not during Ebola	Dry season birth	Some primary	2nd-3rd			-0.740493		not believe clinic trans	during Ebola	10	8.4	0	0	0	0	0	1	0
143	2	63	Born at facility	Bassa	Yes	10	4.20117	0.390625	0.48	36	born in village	not during Ebola	not during Ebola	not during Ebola	not during Ebola	Rainy season birth	none	2nd-3rd			-0.0411183		not believe clinic trans	during Ebola	10	0	0	0	0	0	0	1	0
765	1	70	Not born at facility	Bassa	Yes	32.8	6.24518	0.316456	0.486486	23	born in village	not during Ebola	not during Ebola	not during Ebola	not during Ebola	Rainy season birth	none	4th or higher			-0.487735		Believes clinic trans or unsure	during Ebola	10	11	11.8	0	0	0	0	1	0
152	2	63	Not born at facility	Bassa	Yes	10	4.20117	0.390625	0.48	32	born in village	not during Ebola	not during Ebola	not during Ebola	not during Ebola	Dry season birth	Some primary	2nd-3rd	4	4	-0.282374	2013		not during Ebola	10	0	0	1	1	1	1	1	1
79	3	68	Born at facility	English	Yes	0.1	13.7235	0.151899	0.145833	15	born in village	not during Ebola	not during Ebola	not during Ebola	not during Ebola	Dry season birth	none	4th or higher			-0.354093		Believes clinic trans or unsure	during Ebola	0.1	0	0	0	0	0	0	1	0
1100	2	24	Not born at facility	Bassa	Yes	6.7	4.20117	0.390625	0.59375	19	born in village	not during Ebola	not during Ebola	not during Ebola	not during Ebola	Dry season birth	Some primary	1st			-0.760604		Believes clinic trans or unsure	during Ebola	6.7	0	0	0	0	0	0	1	0
890	3	46	Born at facility	Bassa	Yes	0.1	13.7235	0.151899	0.07	21	born in village	not during Ebola	not during Ebola	not during Ebola	not during Ebola	Rainy season birth	Some primary	1st		1	0.863175		Believes clinic trans or unsure	not during Ebola	0.1	0	0	0	1	0	0	1	0
900	3	68	Born at facility	English	Yes	0.1	13.7235	0.151899	0.145833	22	born in village	not during Ebola	not during Ebola	not during Ebola	not during Ebola	Dry season birth	Some primary	2nd-3rd	2	2	-0.594162	2012		not during Ebola	0.1	0	0	1	1	1	0	1	1
1046	1	11	Born at facility	Bassa	Yes	16	6.24518	0.316456	0.2	23	born in village	not during Ebola	not during Ebola	not during Ebola	not during Ebola	Dry season birth	none	2nd-3rd			0.803237		Believes clinic trans or unsure	during Ebola	10	6	0	0	0	0	0	1	0
1427	1	3	Born at facility	Bassa	Yes	18.9	6.24518	0.316456	0.18552	29	born in village	not during Ebola	not during Ebola	not during Ebola	not during Ebola	Dry season birth	none	2nd-3rd			-0.328069		Believes clinic trans or unsure	during Ebola	10	8.9	0	0	0	0	0	1	0
169	2	36	Born at facility	Bassa	Yes	5.8	4.20117	0.390625	0.761905	26	born in village	not during Ebola	not during Ebola	not during Ebola	not during Ebola	Dry season birth	none	4th or higher	3	3	-0.860736		Believes clinic trans or unsure	not during Ebola	5.8	0	0	1	1	0	0	1	1
994	2	56	Not born at facility	English	No	8.6	4.20117	0.390625	0.709677	29	born in village	not during Ebola	not during Ebola	not during Ebola	not during Ebola	Dry season birth	none	1st			-0.192119		not believe clinic trans	during Ebola	8.6	0	0	0	0	0	0	1	0
1365	3	33	Not born at facility	Bassa	Yes	3.4	13.7235	0.151899	0.129231	26	NOT born in village	not during Ebola	not during Ebola	not during Ebola	not during Ebola	Rainy season birth	Some Secondary or more	2nd-3rd			-0.226639			during Ebola	3.4	0	0	0	0	0	0	1	0
419	1	50	Not born at facility	Bassa	Yes	6.1	6.24518	0.316456	0.4375	27	born in village	not during Ebola	not during Ebola	not during Ebola	not during Ebola	Rainy season birth	none	2nd-3rd			-0.54448		Believes clinic trans or unsure	during Ebola	6.1	0	0	0	0	0	0	1	0
763	3	25	Born at facility	English	Yes	0.1	13.7235	0.151899	0.212121	28	born in village	not during Ebola	not during Ebola	not during Ebola	not during Ebola	Rainy season birth	Some Secondary or more	2nd-3rd			0.481147		Believes clinic trans or unsure	during Ebola	0.1	0	0	0	0	0	0	1	0
219	2	31	Born at facility	English	Yes	8.2	4.20117	0.390625	0.525	17	born in village	not during Ebola	not during Ebola	not during Ebola	not during Ebola	Rainy season birth	Some primary	1st			-0.0068402		Believes clinic trans or unsure	during Ebola	8.2	0	0	0	0	0	0	1	0
248	1	14	Born at facility	English	Yes	19.1	6.24518	0.316456	0.207237	25	born in village	not during Ebola	not during Ebola	not during Ebola	not during Ebola	Dry season birth	Some primary	2nd-3rd	2	2	0.456721	2013	Believes clinic trans or unsure	not during Ebola	10	9.1	0	1	1	1	1	1	1
973	2	64	Born at facility	English	Yes	7.2	4.20117	0.390625	0.333333	19	born in village	not during Ebola	not during Ebola	not during Ebola	not during Ebola	Dry season birth	Some primary	2nd-3rd			-0.554628		not believe clinic trans	during Ebola	7.2	0	0	0	0	0	0	1	0
1002	2	38	Not born at facility	Bassa	Yes	15.9	4.20117	0.390625	0.446808	23	born in village	not during Ebola	not during Ebola	not during Ebola	not during Ebola	Rainy season birth	none	2nd-3rd			-0.860736		Believes clinic trans or unsure	during Ebola	10	5.9	0	0	0	0	0	1	0
1469	2	32	Not born at facility	Bassa	Yes	10.5	4.20117	0.390625	0.588235	29	born in village	not during Ebola	not during Ebola	not during Ebola	not during Ebola	Dry season birth	none	1st	3	3	-0.281839	2011	not believe clinic trans	not during Ebola	10	0.5	0	1	1	0	0	1	1
1452	2	32	Born at facility	English	Yes	10.5	4.20117	0.390625	0.588235	20	born in village	not during Ebola	not during Ebola	not during Ebola	not during Ebola	Rainy season birth	none	1st			-0.219301		not believe clinic trans	during Ebola	10	0.5	0	0	0	0	0	1	0
854	2	30	Born at facility	English	Yes	7.5	4.20117	0.390625	0.85	24	born in village	not during Ebola	not during Ebola	not during Ebola	not during Ebola	Rainy season birth	Some primary	2nd-3rd	2	2	-0.163042	2012	not believe clinic trans	not during Ebola	7.5	0	0	1	1	1	0	1	1
607	2	56	Born at facility	English	No	8.6	4.20117	0.390625	0.709677	28	born in village	not during Ebola	not during Ebola	not during Ebola	not during Ebola	Rainy season birth	none	1st	3	3	-0.685364	2012	not believe clinic trans	not during Ebola	8.6	0	0	1	1	1	0	1	1
443	2	24	Not born at facility	Bassa	No	6.7	4.20117	0.390625	0.59375	18	born in village	not during Ebola	not during Ebola	not during Ebola	not during Ebola	Dry season birth	Some primary	1st			-0.231108		Believes clinic trans or unsure	during Ebola	6.7	0	0	0	0	0	0	1	0
1302	2	20	Born at facility	English	Yes	6.2	4.20117	0.390625	0.326316	19	born in village	not during Ebola	not during Ebola	not during Ebola	not during Ebola	Dry season birth	Some primary	2nd-3rd	1	1	-0.46458	2013	Believes clinic trans or unsure	not during Ebola	6.2	0	0	1	1	1	1	1	1
1432	2	32	Not born at facility	Bassa	Yes	10.5	4.20117	0.390625	0.588235	35	NOT born in village	not during Ebola	not during Ebola	not during Ebola	not during Ebola	Rainy season birth	none	2nd-3rd	4	4	-0.487735		not believe clinic trans	not during Ebola	10	0.5	0	1	1	0	0	1	1
721	2	58	Born at facility	English	Yes	19.8	4.20117	0.390625	0.28	24	born in village	not during Ebola	not during Ebola	not during Ebola	not during Ebola	Rainy season birth	Some Secondary or more	2nd-3rd	2	2	-0.116929	2012	Believes clinic trans or unsure	not during Ebola	10	9.8	0	1	1	1	0	1	1
429	2	39	Not born at facility	Bassa	Yes	4.9	4.20117	0.390625	0.375	23	born in village	not during Ebola	not during Ebola	not during Ebola	not during Ebola	Rainy season birth	none	2nd-3rd			-0.860736		Believes clinic trans or unsure	during Ebola	4.9	0	0	0	0	0	0	1	0
1094	2	36	Not born at facility	Bassa	Yes	5.8	4.20117	0.390625	0.761905	28	born in village	not during Ebola	not during Ebola	not during Ebola	not during Ebola	Dry season birth	none	2nd-3rd			-0.584045		Believes clinic trans or unsure	not during Ebola	5.8	0	0	0	0	0	0	1	0
17	3	25	Born at facility	Bassa	Yes	0.1	13.7235	0.151899	0.212121	41	born in village	not during Ebola	not during Ebola	not during Ebola	not during Ebola	Dry season birth	none	2nd-3rd			-0.143595		not believe clinic trans	during Ebola	0.1	0	0	0	0	0	0	1	0
1008	3	53	Not born at facility	Bassa	Yes	0.1	13.7235	0.151899	0.0771605	26	born in village	not during Ebola	not during Ebola	not during Ebola	not during Ebola	Rainy season birth	Some primary	2nd-3rd			-0.574272		not believe clinic trans	during Ebola	0.1	0	0	0	0	0	0	1	0
884	3	57	Born at facility	Bassa	Yes	4.4	13.7235	0.151899	0.538462	20	born in village	not during Ebola	not during Ebola	not during Ebola	not during Ebola	Rainy season birth	none	2nd-3rd			-0.367492		not believe clinic trans	during Ebola	4.4	0	0	0	0	0	0	1	0
30	3	57	Born at facility	Bassa	No	4.4	13.7235	0.151899	0.538462	36	born in village	not during Ebola	not during Ebola	not during Ebola	not during Ebola	Dry season birth	none	1st	4	4	-0.685364	2013	not believe clinic trans	not during Ebola	4.4	0	0	1	1	1	1	1	1
146	1	69	Not born at facility	Bassa	Yes	15.6	6.24518	0.316456	0.590909	18	born in village	not during Ebola	not during Ebola	not during Ebola	not during Ebola	Dry season birth	Some primary	2nd-3rd			-0.73		Believes clinic trans or unsure	during Ebola	10	5.6	0	0	0	0	0	1	0
739	3	62	Born at facility	Bassa	Yes	2	13.7235	0.151899	0.238636	34	born in village	not during Ebola	not during Ebola	not during Ebola	not during Ebola	Dry season birth	Some primary	1st			-0.147545		not believe clinic trans	during Ebola	2	0	0	0	0	0	0	1	0
1281	2	41	Not born at facility	Bassa	Yes	9.4	4.20117	0.390625	0.913044	23	born in village	not during Ebola	not during Ebola	not during Ebola	not during Ebola	Rainy season birth	none	4th or higher			-0.180933		Believes clinic trans or unsure	during Ebola	9.4	0	0	0	0	0	0	1	0
389	1	14	Born at facility	English	Yes	19.1	6.24518	0.316456	0.207237	19	NOT born in village	not during Ebola	not during Ebola	not during Ebola	not during Ebola	Rainy season birth	Some Secondary or more	1st	1	1	0.698986	2012	Believes clinic trans or unsure	not during Ebola	10	9.1	0	1	1	1	0	1	1
748	1	14	Not born at facility	English	Yes	19.1	6.24518	0.316456	0.207237	24	born in village	not during Ebola	not during Ebola	not during Ebola	not during Ebola	Rainy season birth	Some primary	1st			3.25939		Believes clinic trans or unsure	during Ebola	10	9.1	0	0	0	0	0	1	0
568	2	61	Born at facility	Bassa	No	11.6	4.20117	0.390625	0.809524	26	born in village	not during Ebola	not during Ebola	not during Ebola	during Ebola	Rainy season birth	Some primary	1st	3	3	0.124832	2013	Believes clinic trans or unsure	not during Ebola	10	1.6	0	1	1	1	1	1	1
700	3	53	Born at facility	English	No	0.1	13.7235	0.151899	0.0771605	24	born in village	not during Ebola	not during Ebola	not during Ebola	not during Ebola	Dry season birth	Some primary	4th or higher		2	1.75179		not believe clinic trans	not during Ebola	0.1	0	0	0	1	0	0	1	0
565	2	55	Born at facility	Bassa	Yes	18.4	4.20117	0.390625	0.565217	.i	born in village	not during Ebola	not during Ebola	not during Ebola	not during Ebola	Dry season birth	none	1st			-0.363168		Believes clinic trans or unsure	during Ebola	10	8.4	0	0	0	0	0	1	0
214	2	55	Not born at facility	Bassa	Yes	18.4	4.20117	0.390625	0.565217	20	born in village	not during Ebola	not during Ebola	not during Ebola	not during Ebola	Rainy season birth	Some primary	2nd-3rd		1	-0.486372		Believes clinic trans or unsure	not during Ebola	10	8.4	0	0	1	0	0	1	0
521	1	69	Not born at facility	Bassa	Yes	15.6	6.24518	0.316456	0.590909	32	born in village	not during Ebola	not during Ebola	not during Ebola	not during Ebola	Dry season birth	Some primary	2nd-3rd			-0.303895		not believe clinic trans	during Ebola	10	5.6	0	0	0	0	0	1	0
1035	3	68	Born at facility	English	Yes	0.1	13.7235	0.151899	0.145833	16	born in village	not during Ebola	not during Ebola	not during Ebola	not during Ebola	Dry season birth	none	1st			0.892719		not believe clinic trans	during Ebola	0.1	0	0	0	0	0	0	1	0
813	3	52	Born at facility	English	Yes	0.1	13.7235	0.151899	0.0771605	26	born in village	not during Ebola	not during Ebola	not during Ebola	not during Ebola	Rainy season birth	Some Secondary or more	1st			1.24116		not believe clinic trans	during Ebola	0.1	0	0	0	0	0	0	1	0
1306	2	21	Not born at facility	Bassa	Yes	6.2	4.20117	0.390625	0.326316	20	born in village	not during Ebola	not during Ebola	not during Ebola	not during Ebola	Rainy season birth	Some primary	2nd-3rd	1	1	-0.228371	2012	Believes clinic trans or unsure	not during Ebola	6.2	0	0	1	1	1	0	1	1
739	3	62	Not born at facility	Bassa	Yes	2	13.7235	0.151899	0.238636	24	born in village	not during Ebola	not during Ebola	not during Ebola	not during Ebola	Dry season birth	none	2nd-3rd			-0.147545		not believe clinic trans	during Ebola	2	0	0	0	0	0	0	1	0
634	2	59	Born at facility	English	No	5.5	4.20117	0.390625	0.65625	35	born in village	not during Ebola	not during Ebola	not during Ebola	not during Ebola	Rainy season birth	none	4th or higher			0.301728		not believe clinic trans	during Ebola	5.5	0	0	0	0	0	0	1	0
881	1	70	Not born at facility	Bassa	Yes	32.8	6.24518	0.316456	0.486486	32	born in village	not during Ebola	not during Ebola	not during Ebola	not during Ebola	Dry season birth	none	2nd-3rd			-0.860736		Believes clinic trans or unsure	not during Ebola	10	11	11.8	0	0	0	0	1	0
1341	3	34	Born at facility	English	Yes	3.4	13.7235	0.151899	0.129231	32	born in village	not during Ebola	not during Ebola	not during Ebola	not during Ebola	Rainy season birth	none	4th or higher	4	4	2.47835	2013	Believes clinic trans or unsure	not during Ebola	3.4	0	0	1	1	1	1	1	1
1127	3	52	Born at facility	English	Yes	0.1	13.7235	0.151899	0.0771605	30	born in village	not during Ebola	not during Ebola	not during Ebola	not during Ebola	Dry season birth	Some Secondary or more	2nd-3rd			2.55337		Believes clinic trans or unsure	during Ebola	0.1	0	0	0	0	0	0	1	0
515	2	36	Not born at facility	Bassa	Yes	5.8	4.20117	0.390625	0.761905	28	born in village	not during Ebola	not during Ebola	not during Ebola	not during Ebola	Dry season birth	none	4th or higher			-0.548414		Believes clinic trans or unsure	not during Ebola	5.8	0	0	0	0	0	0	1	0
490	1	67	Born at facility	Bassa	Yes	5.6	6.24518	0.316456	0.416667	36	born in village	not during Ebola	not during Ebola	not during Ebola	not during Ebola	Dry season birth	none	4th or higher	4	4	0.292048	2012	Believes clinic trans or unsure	not during Ebola	5.6	0	0	1	1	1	0	1	1
914	3	62	Born at facility	Bassa	Yes	2	13.7235	0.151899	0.238636	13	born in village	not during Ebola	not during Ebola	not during Ebola	not during Ebola	Rainy season birth	Some Secondary or more	1st			0.338827		not believe clinic trans	during Ebola	2	0	0	0	0	0	0	1	0
933	2	29	Not born at facility	Bassa	Yes	19.6	4.20117	0.390625	0.62069	36	born in village	not during Ebola	not during Ebola	not during Ebola	not during Ebola	Dry season birth	Some primary	2nd-3rd		4	-0.740493		Believes clinic trans or unsure	not during Ebola	10	9.6	0	0	1	0	0	1	0
1375	3	34	Born at facility	Bassa	No	3.4	13.7235	0.151899	0.129231	21	born in village	not during Ebola	not during Ebola	not during Ebola	not during Ebola	Rainy season birth	Some primary	1st	1	1	0.421989	2013	not believe clinic trans	not during Ebola	3.4	0	0	1	1	1	1	1	1
85	1	45	Not born at facility	Bassa	Yes	20.9	6.24518	0.316456	0.333333	.i	born in village	not during Ebola	not during Ebola	not during Ebola	not during Ebola	Rainy season birth	none	1st			-0.860736		Believes clinic trans or unsure	during Ebola	10	10.9	0	0	0	0	0	1	0
1184	3	52	Not born at facility	English	Yes	0.1	13.7235	0.151899	0.0771605	43	born in village	not during Ebola	not during Ebola	not during Ebola	not during Ebola	Rainy season birth	Some Secondary or more	1st			5.6425		not believe clinic trans	during Ebola	0.1	0	0	0	0	0	0	1	0
791	1	43	Not born at facility	Bassa	No	12.4	6.24518	0.316456	0.168	16	born in village	not during Ebola	not during Ebola	not during Ebola	not during Ebola	Dry season birth	none	2nd-3rd			-0.374702		Believes clinic trans or unsure	during Ebola	10	2.4	0	0	0	0	0	1	0
169	2	36	Not born at facility	Bassa	Yes	5.8	4.20117	0.390625	0.761905	25	born in village	not during Ebola	not during Ebola	not during Ebola	not during Ebola	Dry season birth	none	2nd-3rd			-0.860736		not believe clinic trans	during Ebola	5.8	0	0	0	0	0	0	1	0
729	3	17	Born at facility	English	Yes	0.1	13.7235	0.151899	0.196262	28	born in village	not during Ebola	not during Ebola	not during Ebola	not during Ebola	Dry season birth	none	4th or higher	3	3	-0.0553714	2013	Believes clinic trans or unsure	not during Ebola	0.1	0	0	1	1	1	1	1	1
278	1	69	Not born at facility	Bassa	Yes	15.6	6.24518	0.316456	0.590909	18	born in village	not during Ebola	not during Ebola	not during Ebola	not during Ebola	Rainy season birth	Some primary	2nd-3rd	1	1	-0.73	2012	Believes clinic trans or unsure	not during Ebola	10	5.6	0	1	1	1	0	1	1
786	1	10	Born at facility	English	Yes	24.2	6.24518	0.316456	0.2625	34	born in village	not during Ebola	not during Ebola	not during Ebola	not during Ebola	Rainy season birth	none	4th or higher	4	4	-0.23579	2013	Believes clinic trans or unsure	not during Ebola	10	11	3.2	1	1	1	1	1	1
949	2	39	Born at facility	Bassa	Yes	4.9	4.20117	0.390625	0.375	25	born in village	not during Ebola	not during Ebola	not during Ebola	not during Ebola	Dry season birth	Some primary	4th or higher	2	2	-0.0981312	2012	not believe clinic trans	not during Ebola	4.9	0	0	1	1	1	0	1	1
283	2	38	Born at facility	Bassa	Yes	15.9	4.20117	0.390625	0.446808	29	born in village	not during Ebola	not during Ebola	not during Ebola	not during Ebola	Dry season birth	none	2nd-3rd	3	3	-0.860736	2013	Believes clinic trans or unsure	not during Ebola	10	5.9	0	1	1	1	1	1	1
1237	3	34	Not born at facility	Bassa	No	3.4	13.7235	0.151899	0.129231	18	born in village	not during Ebola	not during Ebola	not during Ebola	not during Ebola	Dry season birth	none	1st			0.196241		not believe clinic trans	during Ebola	3.4	0	0	0	0	0	0	1	0
745	1	2	Born at facility	English	Yes	18.9	6.24518	0.316456	0.18552	21	NOT born in village	not during Ebola	not during Ebola	not during Ebola	not during Ebola	Dry season birth	none	1st			0.246891		not believe clinic trans	during Ebola	10	8.9	0	0	0	0	0	1	0
263	1	18	Born at facility	Bassa	Yes	9.6	6.24518	0.316456	1	29	born in village	not during Ebola	not during Ebola	not during Ebola	not during Ebola	Rainy season birth	none	1st	3	3	-0.468903	2013		not during Ebola	9.6	0	0	1	1	1	1	1	1
1353	2	20	Not born at facility	English	Yes	6.2	4.20117	0.390625	0.326316	22	born in village	not during Ebola	not during Ebola	not during Ebola	not during Ebola	Rainy season birth	none	2nd-3rd			0.294831		Believes clinic trans or unsure	during Ebola	6.2	0	0	0	0	0	0	1	0
1447	2	35	Not born at facility	Bassa	Yes	11.4	4.20117	0.390625	0.84	18	born in village	not during Ebola	not during Ebola	not during Ebola	not during Ebola	Rainy season birth	none	2nd-3rd			-0.860736		not believe clinic trans	during Ebola	10	1.4	0	0	0	0	0	1	0
978	1	43	Born at facility	Bassa	Yes	12.4	6.24518	0.316456	0.168	16	born in village	not during Ebola	not during Ebola	not during Ebola	not during Ebola	Rainy season birth	Some primary	1st			-0.493213		Believes clinic trans or unsure	during Ebola	10	2.4	0	0	0	0	0	1	0
692	2	31	Not born at facility	Bassa	Yes	8.2	4.20117	0.390625	0.525	21	born in village	not during Ebola	not during Ebola	not during Ebola	not during Ebola	Dry season birth	none	1st		1	-0.493213		not believe clinic trans	not during Ebola	8.2	0	0	0	1	0	0	1	0
1461	2	35	Born at facility	English	Yes	11.4	4.20117	0.390625	0.84	22	born in village	not during Ebola	not during Ebola	not during Ebola	not during Ebola	Dry season birth	none	2nd-3rd	2	2	0.630781	2013	not believe clinic trans	not during Ebola	10	1.4	0	1	1	1	1	1	1
1178	3	25	Born at facility	English	Yes	0.1	13.7235	0.151899	0.212121	37	born in village	not during Ebola	not during Ebola	not during Ebola	not during Ebola	Dry season birth	Some primary	4th or higher			0.059857		not believe clinic trans	during Ebola	0.1	0	0	0	0	0	0	1	0
111	2	23	Not born at facility	Bassa	Yes	5.6	4.20117	0.390625	0.583333	14	born in village	not during Ebola	not during Ebola	not during Ebola	not during Ebola	Dry season birth	none	2nd-3rd			-0.374702		Believes clinic trans or unsure	during Ebola	5.6	0	0	0	0	0	0	1	0
1317	3	34	Not born at facility	English	Yes	3.4	13.7235	0.151899	0.129231	18	born in village	not during Ebola	not during Ebola	not during Ebola	not during Ebola	Dry season birth	Some Secondary or more	2nd-3rd			1.15967			during Ebola	3.4	0	0	0	0	0	0	1	0
233	2	61	Born at facility	Bassa	Yes	11.6	4.20117	0.390625	0.809524	23	born in village	not during Ebola	not during Ebola	not during Ebola	not during Ebola	Rainy season birth	Some primary	2nd-3rd	2	2	-0.181971	2011	Believes clinic trans or unsure	not during Ebola	10	1.6	0	1	1	0	0	1	1
991	3	17	Not born at facility	English	Yes	0.1	13.7235	0.151899	0.196262	22	born in village	not during Ebola	not during Ebola	not during Ebola	not during Ebola	Dry season birth	Some primary	2nd-3rd			-0.257912		Believes clinic trans or unsure	during Ebola	0.1	0	0	0	0	0	0	1	0
219	2	31	Not born at facility	Bassa	No	8.2	4.20117	0.390625	0.525	14	born in village	not during Ebola	not during Ebola	not during Ebola	not during Ebola	Dry season birth	none	2nd-3rd			-0.0068402		Believes clinic trans or unsure	during Ebola	8.2	0	0	0	0	0	0	1	0
778	1	50	Not born at facility	Bassa	Yes	6.1	6.24518	0.316456	0.4375	14	born in village	not during Ebola	not during Ebola	not during Ebola	not during Ebola	Dry season birth	none	2nd-3rd			-0.0226402			during Ebola	6.1	0	0	0	0	0	0	1	0
920	1	45	Not born at facility	Bassa	Yes	20.9	6.24518	0.316456	0.333333	25	born in village	not during Ebola	not during Ebola	not during Ebola	not during Ebola	Dry season birth	none	2nd-3rd			-0.752947		Believes clinic trans or unsure	during Ebola	10	10.9	0	0	0	0	0	1	0
950	3	57	Born at facility	Bassa	Yes	4.4	13.7235	0.151899	0.538462	20	born in village	not during Ebola	not during Ebola	not during Ebola	not during Ebola	Dry season birth	none	2nd-3rd			-0.584045		Believes clinic trans or unsure	during Ebola	4.4	0	0	0	0	0	0	1	0
750	1	18	Not born at facility	Bassa	Yes	9.6	6.24518	0.316456	1	23	born in village	not during Ebola	not during Ebola	not during Ebola	not during Ebola	Rainy season birth	Some primary	4th or higher	2	2	-0.473918	2013	Believes clinic trans or unsure	not during Ebola	9.6	0	0	1	1	1	1	1	1
985	1	1	Born at facility	English	Yes	20.5	6.24518	0.316456	0.232558	25	NOT born in village	not during Ebola	not during Ebola	not during Ebola	not during Ebola	Dry season birth	none	2nd-3rd			2.85566		Believes clinic trans or unsure	during Ebola	10	10.5	0	0	0	0	0	1	0
320	1	47	Born at facility	Bassa	Yes	8	6.24518	0.316456	0.328125	20	born in village	not during Ebola	not during Ebola	not during Ebola	not during Ebola	Dry season birth	Some primary	2nd-3rd			-0.612094		Believes clinic trans or unsure	during Ebola	8	0	0	0	0	0	0	1	0
1348	2	20	Not born at facility	Bassa	Yes	6.2	4.20117	0.390625	0.326316	35	born in village	not during Ebola	not during Ebola	not during Ebola	not during Ebola	Dry season birth	none	2nd-3rd			-0.48272		not believe clinic trans	not during Ebola	6.2	0	0	0	0	0	0	1	0
41	3	62	Not born at facility	English	Yes	2	13.7235	0.151899	0.238636	17	born in village	not during Ebola	not during Ebola	not during Ebola	not during Ebola	Dry season birth	Some primary	2nd-3rd			-0.201197		Believes clinic trans or unsure	during Ebola	2	0	0	0	0	0	0	1	0
370	1	10	Not born at facility	English	Yes	24.2	6.24518	0.316456	0.2625	25	NOT born in village	not during Ebola	not during Ebola	not during Ebola	not during Ebola	Dry season birth	Some primary	1st			-0.115547		Believes clinic trans or unsure	during Ebola	10	11	3.2	0	0	0	0	1	0
590	1	8	Not born at facility	Bassa	No	8.4	6.24518	0.316456	0.35	28	born in village	not during Ebola	not during Ebola	not during Ebola	not during Ebola	Dry season birth	none	4th or higher	3	3	0.0224782	2012	Believes clinic trans or unsure	not during Ebola	8.4	0	0	1	1	1	0	1	1
791	1	43	Born at facility	Bassa	No	12.4	6.24518	0.316456	0.168	14	born in village	not during Ebola	not during Ebola	not during Ebola	not during Ebola	Dry season birth	none	1st			-0.374702		Believes clinic trans or unsure	during Ebola	10	2.4	0	0	0	0	0	1	0
1435	2	19	Born at facility	Bassa	Yes	6.2	4.20117	0.390625	0.326316	22	born in village	not during Ebola	not during Ebola	not during Ebola	not during Ebola	Rainy season birth	none	2nd-3rd	2	2	-0.860736	2012	Believes clinic trans or unsure	not during Ebola	6.2	0	0	1	1	1	0	1	1
528	3	22	Born at facility	Bassa	No	0.1	13.7235	0.151899	0.084	22	born in village	not during Ebola	not during Ebola	not during Ebola	not during Ebola	Rainy season birth	none	1st			0.985886		Believes clinic trans or unsure	during Ebola	0.1	0	0	0	0	0	0	1	0
158	1	13	Not born at facility	English	Yes	19.1	6.24518	0.316456	0.207237	31	born in village	not during Ebola	not during Ebola	not during Ebola	not during Ebola	Rainy season birth	none	1st	3	3	-0.250022	2013	Believes clinic trans or unsure	not during Ebola	10	9.1	0	1	1	1	1	1	1
1321	2	21	Not born at facility	Bassa	Yes	6.2	4.20117	0.390625	0.326316	31	born in village	not during Ebola	not during Ebola	not during Ebola	not during Ebola	Rainy season birth	Some primary	4th or higher			0.0958707		not believe clinic trans	during Ebola	6.2	0	0	0	0	0	0	1	0
828	1	47	Not born at facility	English	Yes	8	6.24518	0.316456	0.328125	26	born in village	not during Ebola	not during Ebola	not during Ebola	not during Ebola	Dry season birth	Some primary	4th or higher	3	3	-0.169638	2013	Believes clinic trans or unsure	not during Ebola	8	0	0	1	1	1	1	1	1
143	2	63	Born at facility	Bassa	Yes	10	4.20117	0.390625	0.48	41	born in village	not during Ebola	not during Ebola	not during Ebola	not during Ebola	Rainy season birth	none	4th or higher		4	-0.0411183		not believe clinic trans	not during Ebola	10	0	0	0	1	0	0	1	0
1233	3	33	Born at facility	Bassa	Yes	3.4	13.7235	0.151899	0.129231	17	born in village	not during Ebola	not during Ebola	not during Ebola	not during Ebola	Dry season birth	none	1st			-0.333065		not believe clinic trans	during Ebola	3.4	0	0	0	0	0	0	1	0
476	2	28	Not born at facility	Bassa	Yes	8.3	4.20117	0.390625	0.411765	23	born in village	not during Ebola	not during Ebola	not during Ebola	not during Ebola	Rainy season birth	none	4th or higher			0.556427		not believe clinic trans	during Ebola	8.3	0	0	0	0	0	0	1	0
867	1	45	Born at facility	Bassa	Yes	20.9	6.24518	0.316456	0.333333	20	NOT born in village	not during Ebola	not during Ebola	not during Ebola	not during Ebola	Rainy season birth	none	2nd-3rd	1	1	-0.367492	2013	Believes clinic trans or unsure	not during Ebola	10	10.9	0	1	1	1	1	1	1
473	2	24	Not born at facility	Bassa	Yes	6.7	4.20117	0.390625	0.59375	31	born in village	not during Ebola	not during Ebola	not during Ebola	not during Ebola	Dry season birth	none	4th or higher			-0.395359		not believe clinic trans	during Ebola	6.7	0	0	0	0	0	0	1	0
424	2	60	Not born at facility	Bassa	Yes	5.6	4.20117	0.390625	0.28	18	born in village	not during Ebola	not during Ebola	not during Ebola	not during Ebola	Dry season birth	none	2nd-3rd			-0.613457		Believes clinic trans or unsure	during Ebola	5.6	0	0	0	0	0	0	1	0
1309	2	21	Born at facility	English	Yes	6.2	4.20117	0.390625	0.326316	31	born in village	not during Ebola	not during Ebola	not during Ebola	not during Ebola	Rainy season birth	Some Secondary or more	4th or higher			-0.0541823		Believes clinic trans or unsure	during Ebola	6.2	0	0	0	0	0	0	1	0
320	1	47	Born at facility	Bassa	Yes	8	6.24518	0.316456	0.328125	27	born in village	not during Ebola	not during Ebola	not during Ebola	not during Ebola	Rainy season birth	Some primary	4th or higher			-0.612094		Believes clinic trans or unsure	during Ebola	8	0	0	0	0	0	0	1	0
778	1	50	Not born at facility	Bassa	Yes	6.1	6.24518	0.316456	0.4375	.i	born in village	not during Ebola	not during Ebola	not during Ebola	not during Ebola	Dry season birth	none	1st			-0.0226402			during Ebola	6.1	0	0	0	0	0	0	1	0
775	2	23	Not born at facility	Bassa	Yes	5.6	4.20117	0.390625	0.583333	26	born in village	not during Ebola	not during Ebola	not during Ebola	not during Ebola	Dry season birth	none	1st			-0.634066		not believe clinic trans	during Ebola	5.6	0	0	0	0	0	0	1	0
1302	2	20	Born at facility	English	Yes	6.2	4.20117	0.390625	0.326316	16	born in village	not during Ebola	not during Ebola	not during Ebola	not during Ebola	Dry season birth	Some primary	2nd-3rd	1	1	-0.46458		Believes clinic trans or unsure	not during Ebola	6.2	0	0	1	1	0	0	1	1
1427	1	3	Born at facility	Bassa	Yes	18.9	6.24518	0.316456	0.18552	21	born in village	not during Ebola	not during Ebola	not during Ebola	not during Ebola	Dry season birth	none	2nd-3rd			-0.328069		Believes clinic trans or unsure	during Ebola	10	8.9	0	0	0	0	0	1	0
169	2	36	Born at facility	Bassa	Yes	5.8	4.20117	0.390625	0.761905	27	born in village	not during Ebola	not during Ebola	not during Ebola	not during Ebola	Dry season birth	none	4th or higher			-0.860736		not believe clinic trans	during Ebola	5.8	0	0	0	0	0	0	1	0
454	1	8	Born at facility	Bassa	Yes	8.4	6.24518	0.316456	0.35	37	born in village	not during Ebola	not during Ebola	not during Ebola	not during Ebola	Rainy season birth	none	1st			-0.43669		Believes clinic trans or unsure	during Ebola	8.4	0	0	0	0	0	0	1	0
391	1	5	Not born at facility	English	No	29.3	6.24518	0.316456	0.642857	32	born in village	not during Ebola	not during Ebola	not during Ebola	not during Ebola	Rainy season birth	Some primary	1st	4	4	0.0107207	2011	Believes clinic trans or unsure	not during Ebola	10	11	8.3	1	1	0	0	1	1
1233	3	33	Born at facility	Bassa	Yes	3.4	13.7235	0.151899	0.129231	26	born in village	not during Ebola	not during Ebola	not during Ebola	not during Ebola	Dry season birth	none	2nd-3rd			-0.333065		not believe clinic trans	during Ebola	3.4	0	0	0	0	0	0	1	0
1405	2	35	Not born at facility	Bassa	Yes	11.4	4.20117	0.390625	0.84	30	born in village	not during Ebola	not during Ebola	not during Ebola	not during Ebola	Dry season birth	none	2nd-3rd			-0.325396		Believes clinic trans or unsure	during Ebola	10	1.4	0	0	0	0	0	1	0
1482	2	32	Not born at facility	Bassa	Yes	10.5	4.20117	0.390625	0.588235	41	born in village	not during Ebola	not during Ebola	not during Ebola	not during Ebola	Dry season birth	none	4th or higher	4	4	-0.75431	2012	Believes clinic trans or unsure	not during Ebola	10	0.5	0	1	1	1	1	1	1
1456	1	3	Born at facility	English	Yes	18.9	6.24518	0.316456	0.18552	24	NOT born in village	not during Ebola	not during Ebola	not during Ebola	not during Ebola	Dry season birth	Some Secondary or more	2nd-3rd	2	2	-0.604655	2013	Believes clinic trans or unsure	not during Ebola	10	8.9	0	1	1	1	1	1	1
634	2	59	Born at facility	English	No	5.5	4.20117	0.390625	0.65625	20	born in village	not during Ebola	not during Ebola	not during Ebola	not during Ebola	Rainy season birth	Some primary	2nd-3rd			0.301728		Believes clinic trans or unsure	during Ebola	5.5	0	0	0	0	0	0	1	0
830	1	65	Born at facility	Bassa	Yes	5.2	6.24518	0.316456	0.782609	26	born in village	not during Ebola	not during Ebola	not during Ebola	not during Ebola	Rainy season birth	none	4th or higher			-0.860736		not believe clinic trans	during Ebola	5.2	0	0	0	0	0	0	1	0
1085	1	7	Born at facility	Bassa	Yes	16.1	6.24518	0.316456	0.4	32	born in village	not during Ebola	not during Ebola	not during Ebola	not during Ebola	Dry season birth	Some primary	2nd-3rd	4	4	-0.58284	2011		not during Ebola	10	6.1	0	1	1	0	0	1	1
973	2	64	Born at facility	English	Yes	7.2	4.20117	0.390625	0.333333	22	born in village	not during Ebola	not during Ebola	not during Ebola	not during Ebola	Rainy season birth	Some primary	2nd-3rd	2	2	-0.554628	2011	not believe clinic trans	not during Ebola	7.2	0	0	1	1	1	0	1	1
695	3	46	Born at facility	English	No	0.1	13.7235	0.151899	0.07	32	born in village	not during Ebola	not during Ebola	not during Ebola	not during Ebola	Dry season birth	Some primary	2nd-3rd			0.541494		not believe clinic trans	during Ebola	0.1	0	0	0	0	0	0	1	0
1086	2	24	Not born at facility	English	Yes	6.7	4.20117	0.390625	0.59375	17	born in village	not during Ebola	not during Ebola	not during Ebola	not during Ebola	Rainy season birth	none	1st			-0.0419204		not believe clinic trans	during Ebola	6.7	0	0	0	0	0	0	1	0
1008	3	53	Born at facility	Bassa	Yes	0.1	13.7235	0.151899	0.0771605	29	born in village	not during Ebola	not during Ebola	not during Ebola	not during Ebola	Dry season birth	Some primary	2nd-3rd			-0.574272		not believe clinic trans	during Ebola	0.1	0	0	0	0	0	0	1	0
1369	2	20	Born at facility	Bassa	Yes	6.2	4.20117	0.390625	0.326316	43	born in village	not during Ebola	not during Ebola	not during Ebola	not during Ebola	Rainy season birth	none	2nd-3rd	4	4	-0.59964	2012	Believes clinic trans or unsure	not during Ebola	6.2	0	0	1	1	1	1	1	1
465	3	53	Born at facility	English	Yes	0.1	13.7235	0.151899	0.0771605	16	born in village	not during Ebola	not during Ebola	not during Ebola	not during Ebola	Rainy season birth	Some Secondary or more	2nd-3rd			1.38268		Believes clinic trans or unsure	during Ebola	0.1	0	0	0	0	0	0	1	0
1141	2	64	Born at facility	English	Yes	7.2	4.20117	0.390625	0.333333	14	born in village	not during Ebola	not during Ebola	not during Ebola	not during Ebola	Rainy season birth	none	1st			-0.73		not believe clinic trans	during Ebola	7.2	0	0	0	0	0	0	1	0
710	1	70	Not born at facility	English	Yes	32.8	6.24518	0.316456	0.486486	16	born in village	not during Ebola	not during Ebola	not during Ebola	not during Ebola	Rainy season birth	none	1st			-0.311		not believe clinic trans	during Ebola	10	11	11.8	0	0	0	0	1	0
1465	2	35	Not born at facility	Bassa	Yes	11.4	4.20117	0.390625	0.84	29	born in village	not during Ebola	not during Ebola	not during Ebola	not during Ebola	Dry season birth	none	2nd-3rd			-0.473918		Believes clinic trans or unsure	during Ebola	10	1.4	0	0	0	0	0	1	0
862	2	24	Born at facility	Bassa	Yes	6.7	4.20117	0.390625	0.59375	26	born in village	not during Ebola	not during Ebola	not during Ebola	not during Ebola	Rainy season birth	none	2nd-3rd			-0.388519		not believe clinic trans	during Ebola	6.7	0	0	0	0	0	0	1	0
1309	2	21	Born at facility	English	Yes	6.2	4.20117	0.390625	0.326316	26	born in village	not during Ebola	not during Ebola	not during Ebola	not during Ebola	Rainy season birth	Some Secondary or more	4th or higher			-0.0541823		Believes clinic trans or unsure	during Ebola	6.2	0	0	0	0	0	0	1	0
1109	2	54	Not born at facility	English	Yes	5.1	4.20117	0.390625	0.7	31	born in village	not during Ebola	not during Ebola	not during Ebola	not during Ebola	Rainy season birth	none	1st	3	3	-0.221611	2013	not believe clinic trans	not during Ebola	5.1	0	0	1	1	1	1	1	1
1186	1	43	Not born at facility	Bassa	Yes	12.4	6.24518	0.316456	0.168	20	born in village	not during Ebola	not during Ebola	not during Ebola	not during Ebola	Dry season birth	none	2nd-3rd			-0.64652		Believes clinic trans or unsure	during Ebola	10	2.4	0	0	0	0	0	1	0
1077	1	9	Born at facility	Bassa	Yes	5.2	6.24518	0.316456	0.913044	14	born in village	not during Ebola	not during Ebola	not during Ebola	not during Ebola	Dry season birth	none	4th or higher			-0.73		Believes clinic trans or unsure	during Ebola	5.2	0	0	0	0	0	0	1	0
326	3	52	Born at facility	English	Yes	0.1	13.7235	0.151899	0.0771605	32	NOT born in village	not during Ebola	not during Ebola	not during Ebola	not during Ebola	Rainy season birth	Some primary	1st	4	4	3.48566	2011	Believes clinic trans or unsure	not during Ebola	0.1	0	0	1	1	0	0	1	1
393	2	39	Not born at facility	Bassa	Yes	4.9	4.20117	0.390625	0.375	12	born in village	not during Ebola	not during Ebola	not during Ebola	not during Ebola	Rainy season birth	Some primary	2nd-3rd			-0.58284		not believe clinic trans	during Ebola	4.9	0	0	0	0	0	0	1	0
1354	3	34	Born at facility	English	Yes	3.4	13.7235	0.151899	0.129231	.i	born in village	not during Ebola	not during Ebola	not during Ebola	not during Ebola	Rainy season birth	none	2nd-3rd			3.90116		Believes clinic trans or unsure	during Ebola	3.4	0	0	0	0	0	0	1	0
1231	2	41	Born at facility	Bassa	Yes	9.4	4.20117	0.390625	0.913044	25	born in village	not during Ebola	not during Ebola	not during Ebola	not during Ebola	Dry season birth	none	4th or higher	2	2	0.246942	2011	Believes clinic trans or unsure	not during Ebola	9.4	0	0	1	1	0	0	1	1
839	3	53	Born at facility	English	Yes	0.1	13.7235	0.151899	0.0771605	23	born in village	not during Ebola	not during Ebola	not during Ebola	not during Ebola	Rainy season birth	Some primary	2nd-3rd	2	2	1.53353	2013	not believe clinic trans	not during Ebola	0.1	0	0	1	1	1	1	1	1
1358	3	34	Born at facility	English	Yes	3.4	13.7235	0.151899	0.129231	36	born in village	not during Ebola	not during Ebola	not during Ebola	not during Ebola	Dry season birth	Some Secondary or more	2nd-3rd	4	4	2.26354	2012	Believes clinic trans or unsure	not during Ebola	3.4	0	0	1	1	1	1	1	1
804	2	29	Born at facility	Bassa	Yes	19.6	4.20117	0.390625	0.62069	26	born in village	not during Ebola	not during Ebola	not during Ebola	not during Ebola	Rainy season birth	none	2nd-3rd			-0.740493		not believe clinic trans	during Ebola	10	9.6	0	0	0	0	0	1	0
557	1	13	Not born at facility	English	Yes	19.1	6.24518	0.316456	0.207237	25	born in village	not during Ebola	not during Ebola	not during Ebola	not during Ebola	Rainy season birth	Some primary	2nd-3rd			3.21793		not believe clinic trans	during Ebola	10	9.1	0	0	0	0	0	1	0
1063	2	26	Born at facility	Bassa	Yes	11.2	4.20117	0.390625	0.636364	.i	born in village	not during Ebola	not during Ebola	not during Ebola	not during Ebola	Rainy season birth	Some primary	1st			0.35291		not believe clinic trans	during Ebola	10	1.2	0	0	0	0	0	1	0
1174	2	54	Born at facility	English	No	5.4	4.20117	0.390625	0.7	29	NOT born in village	not during Ebola	not during Ebola	not during Ebola	not during Ebola	Rainy season birth	none	4th or higher		3	2.03721		Believes clinic trans or unsure	not during Ebola	5.4	0	0	0	1	0	0	1	0
1236	2	21	Not born at facility	Bassa	Yes	6.2	4.20117	0.390625	0.326316	.i	born in village	not during Ebola	not during Ebola	not during Ebola	not during Ebola	Dry season birth	Some primary	1st			0.101363		Believes clinic trans or unsure	during Ebola	6.2	0	0	0	0	0	0	1	0
18	2	59	Not born at facility	Bassa	Yes	5.5	4.20117	0.390625	0.65625	23	NOT born in village	not during Ebola	not during Ebola	not during Ebola	not during Ebola	Rainy season birth	Some primary	1st			-0.740493		Believes clinic trans or unsure	during Ebola	5.5	0	0	0	0	0	0	1	0
415	3	68	Born at facility	English	Yes	0.1	13.7235	0.151899	0.145833	27	born in village	not during Ebola	not during Ebola	not during Ebola	not during Ebola	Dry season birth	Some Secondary or more	4th or higher			2.35438		Believes clinic trans or unsure	during Ebola	0.1	0	0	0	0	0	0	1	0
1172	1	47	Born at facility	English	Yes	8	6.24518	0.316456	0.328125	21	born in village	not during Ebola	not during Ebola	not during Ebola	not during Ebola	Dry season birth	none	1st			0.288383		Believes clinic trans or unsure	during Ebola	8	0	0	0	0	0	0	1	0
1457	2	32	Not born at facility	Bassa	Yes	10.5	4.20117	0.390625	0.588235	21	born in village	not during Ebola	not during Ebola	not during Ebola	not during Ebola	Dry season birth	Some primary	2nd-3rd			-0.609756		not believe clinic trans	during Ebola	10	0.5	0	0	0	0	0	1	0
560	1	49	Born at facility	English	Yes	16.9	6.24518	0.316456	0.714286	15	born in village	not during Ebola	not during Ebola	not during Ebola	not during Ebola	Dry season birth	none	1st	1	1	-0.860736	2011		not during Ebola	10	6.9	0	1	1	0	0	1	1
5	1	51	Not born at facility	Bassa	Yes	16.3	6.24518	0.316456	0.365385	29	born in village	not during Ebola	not during Ebola	not during Ebola	not during Ebola	Rainy season birth	Some primary	2nd-3rd	3	3	-0.724898	2013	Believes clinic trans or unsure	not during Ebola	10	6.3	0	1	1	1	1	1	1
274	1	6	Born at facility	Bassa	No	10.9	6.24518	0.316456	0.287671	20	born in village	not during Ebola	not during Ebola	not during Ebola	not during Ebola	Dry season birth	none	2nd-3rd	1	1	-0.134082	2013	Believes clinic trans or unsure	not during Ebola	10	0.9	0	1	1	1	1	1	1
48	2	23	Not born at facility	English	No	5.6	4.20117	0.390625	0.583333	21	born in village	not during Ebola	not during Ebola	not during Ebola	not during Ebola	Rainy season birth	Some primary	2nd-3rd			-0.211784		not believe clinic trans	during Ebola	5.6	0	0	0	0	0	0	1	0
586	1	50	Not born at facility	Bassa	Yes	6.1	6.24518	0.316456	0.4375	17	born in village	not during Ebola	not during Ebola	not during Ebola	not during Ebola	Rainy season birth	none	1st			-0.752947		not believe clinic trans	during Ebola	6.1	0	0	0	0	0	0	1	0
1077	1	9	Born at facility	Bassa	Yes	5.2	6.24518	0.316456	0.913044	22	born in village	not during Ebola	not during Ebola	not during Ebola	not during Ebola	Dry season birth	none	4th or higher			-0.73		Believes clinic trans or unsure	during Ebola	5.2	0	0	0	0	0	0	1	0
849	3	68	Not born at facility	English	Yes	0.1	13.7235	0.151899	0.145833	34	born in village	not during Ebola	not during Ebola	not during Ebola	not during Ebola	Dry season birth	Some Secondary or more	1st	4	4	1.49955	2012	Believes clinic trans or unsure	not during Ebola	0.1	0	0	1	1	1	0	1	1
551	1	65	Not born at facility	English	Yes	5.4	6.24518	0.316456	0.782609	35	born in village	not during Ebola	not during Ebola	not during Ebola	not during Ebola	Dry season birth	Some primary	4th or higher		4	-0.54448		not believe clinic trans	not during Ebola	5.4	0	0	0	1	0	0	1	0
1342	2	41	Not born at facility	Bassa	Yes	9.4	4.20117	0.390625	0.913044	16	born in village	not during Ebola	not during Ebola	not during Ebola	not during Ebola	Dry season birth	none	1st			-0.860736		Believes clinic trans or unsure	during Ebola	9.4	0	0	0	0	0	0	1	0
838	1	4	Not born at facility	English	Yes	5.6	6.24518	0.316456	0.525	26	born in village	not during Ebola	not during Ebola	not during Ebola	not during Ebola	Dry season birth	none	2nd-3rd	3	3	0.432132	2011	Believes clinic trans or unsure	not during Ebola	5.6	0	0	1	1	0	0	1	1
895	2	36	Born at facility	Bassa	Yes	5.8	4.20117	0.390625	0.761905	17	NOT born in village	not during Ebola	not during Ebola	not during Ebola	not during Ebola	Dry season birth	Some primary	1st			-0.860736		Believes clinic trans or unsure	during Ebola	5.8	0	0	0	0	0	0	1	0
162	3	46	Not born at facility	English	No	0.1	13.7235	0.151899	0.07	22	born in village	not during Ebola	not during Ebola	not during Ebola	not during Ebola	Rainy season birth	Some primary	2nd-3rd			-0.243966		not believe clinic trans	during Ebola	0.1	0	0	0	0	0	0	1	0
883	3	17	Not born at facility	Bassa	No	0.1	13.7235	0.151899	0.196262	15	NOT born in village	not during Ebola	not during Ebola	not during Ebola	not during Ebola	Dry season birth	none	2nd-3rd			0.683807		Believes clinic trans or unsure	during Ebola	0.1	0	0	0	0	0	0	1	0
375	3	53	Not born at facility	English	Yes	0.1	13.7235	0.151899	0.0771605	27	born in village	not during Ebola	not during Ebola	not during Ebola	not during Ebola	Rainy season birth	Some primary	1st			3.35173		Believes clinic trans or unsure	during Ebola	0.1	0	0	0	0	0	0	1	0
1121	1	10	Born at facility	English	No	24.2	6.24518	0.316456	0.2625	20	born in village	not during Ebola	not during Ebola	not during Ebola	not during Ebola	Dry season birth	none	1st	1	1	-0.565567	2011	Believes clinic trans or unsure	not during Ebola	10	11	3.2	1	1	1	0	1	1
1138	1	9	Born at facility	English	Yes	5.2	6.24518	0.316456	0.913044	18	born in village	not during Ebola	not during Ebola	not during Ebola	not during Ebola	Dry season birth	Some Secondary or more	1st		1	-0.612094		not believe clinic trans	not during Ebola	5.2	0	0	0	1	0	0	1	0
733	3	53	Not born at facility	English	Yes	0.1	13.7235	0.151899	0.0771605	22	born in village	not during Ebola	not during Ebola	not during Ebola	not during Ebola	Dry season birth	none	2nd-3rd			1.83924		Believes clinic trans or unsure	during Ebola	0.1	0	0	0	0	0	0	1	0
1234	3	33	Born at facility	Bassa	Yes	3.4	13.7235	0.151899	0.129231	28	born in village	not during Ebola	not during Ebola	not during Ebola	not during Ebola	Dry season birth	none	2nd-3rd			0.0471138		Believes clinic trans or unsure	during Ebola	3.4	0	0	0	0	0	0	1	0
881	1	70	Not born at facility	Bassa	Yes	32.8	6.24518	0.316456	0.486486	35	born in village	not during Ebola	not during Ebola	not during Ebola	not during Ebola	Rainy season birth	none	4th or higher	4	4	-0.860736	2012	Believes clinic trans or unsure	not during Ebola	10	11	11.8	1	1	1	1	1	1
683	3	46	Born at facility	English	Yes	0.1	13.7235	0.151899	0.07	22	born in village	not during Ebola	not during Ebola	not during Ebola	not during Ebola	Dry season birth	Some primary	1st			0.601063		Believes clinic trans or unsure	during Ebola	0.1	0	0	0	0	0	0	1	0
865	1	67	Born at facility	English	No	5.6	6.24518	0.316456	0.416667	25	born in village	not during Ebola	not during Ebola	not during Ebola	not during Ebola	Dry season birth	Some primary	4th or higher		2	0.453277		Believes clinic trans or unsure	not during Ebola	5.6	0	0	0	1	0	0	1	0
1057	2	39	Not born at facility	English	No	4.9	4.20117	0.390625	0.375	19	NOT born in village	not during Ebola	not during Ebola	not during Ebola	not during Ebola	Dry season birth	Some primary	2nd-3rd			-0.740493		Believes clinic trans or unsure	during Ebola	4.9	0	0	0	0	0	0	1	0
283	2	38	Not born at facility	Bassa	Yes	15.9	4.20117	0.390625	0.446808	28	born in village	not during Ebola	not during Ebola	not during Ebola	not during Ebola	Dry season birth	none	2nd-3rd		3	-0.860736		Believes clinic trans or unsure	not during Ebola	10	5.9	0	0	1	0	0	1	0
440	1	65	Born at facility	English	Yes	5.2	6.24518	0.316456	0.782609	23	born in village	not during Ebola	not during Ebola	not during Ebola	not during Ebola	Dry season birth	Some Secondary or more	1st			-0.118849		Believes clinic trans or unsure	during Ebola	5.2	0	0	0	0	0	0	1	0
950	3	57	Born at facility	Bassa	Yes	4.4	13.7235	0.151899	0.538462	42	born in village	not during Ebola	not during Ebola	not during Ebola	not during Ebola	Rainy season birth	none	4th or higher	4	4	-0.584045	2013	Believes clinic trans or unsure	not during Ebola	4.4	0	0	1	1	1	1	1	1
912	3	57	Not born at facility	Bassa	No	4.4	13.7235	0.151899	0.538462	38	born in village	not during Ebola	not during Ebola	not during Ebola	not during Ebola	Rainy season birth	none	4th or higher	4	4	-0.157693		Believes clinic trans or unsure	not during Ebola	4.4	0	0	1	1	0	0	1	1
870	1	43	Born at facility	Bassa	Yes	12.4	6.24518	0.316456	0.168	38	born in village	not during Ebola	not during Ebola	not during Ebola	not during Ebola	Dry season birth	none	4th or higher		4	0.246817		Believes clinic trans or unsure	not during Ebola	10	2.4	0	0	1	0	0	1	0
786	1	10	Born at facility	English	Yes	24.2	6.24518	0.316456	0.2625	25	born in village	not during Ebola	not during Ebola	not during Ebola	not during Ebola	Dry season birth	Some Secondary or more	2nd-3rd	2	2	-0.23579	2011	Believes clinic trans or unsure	not during Ebola	10	11	3.2	1	1	1	0	1	1
305	1	50	Not born at facility	Bassa	Yes	6.1	6.24518	0.316456	0.4375	24	born in village	not during Ebola	not during Ebola	not during Ebola	not during Ebola	Dry season birth	none	4th or higher	2	2	-0.860736	2011	Believes clinic trans or unsure	not during Ebola	6.1	0	0	1	1	0	0	1	1
146	1	69	Not born at facility	Bassa	Yes	15.6	6.24518	0.316456	0.590909	23	born in village	not during Ebola	not during Ebola	not during Ebola	not during Ebola	Dry season birth	Some primary	4th or higher	2	2	-0.73	2013	Believes clinic trans or unsure	not during Ebola	10	5.6	0	1	1	1	1	1	1
745	1	2	Born at facility	English	Yes	18.9	6.24518	0.316456	0.18552	28	NOT born in village	not during Ebola	not during Ebola	not during Ebola	not during Ebola	Rainy season birth	none	2nd-3rd			0.246891		not believe clinic trans	during Ebola	10	8.9	0	0	0	0	0	1	0
120	1	45	Not born at facility	Bassa	Yes	20.9	6.24518	0.316456	0.333333	18	born in village	not during Ebola	not during Ebola	not during Ebola	not during Ebola	Rainy season birth	Some primary	1st	1	1	-0.75431	2012	Believes clinic trans or unsure	not during Ebola	10	10.9	0	1	1	1	0	1	1
238	2	38	Not born at facility	Bassa	Yes	15.9	4.20117	0.390625	0.446808	22	born in village	not during Ebola	not during Ebola	not during Ebola	not during Ebola	Rainy season birth	Some primary	2nd-3rd			-0.724898		Believes clinic trans or unsure	during Ebola	10	5.9	0	0	0	0	0	1	0
1321	2	21	Born at facility	Bassa	Yes	6.2	4.20117	0.390625	0.326316	19	born in village	not during Ebola	not during Ebola	not during Ebola	not during Ebola	Dry season birth	Some primary	2nd-3rd			0.0958707		not believe clinic trans	during Ebola	6.2	0	0	0	0	0	0	1	0
1100	2	24	Born at facility	Bassa	Yes	6.7	4.20117	0.390625	0.59375	28	born in village	not during Ebola	not during Ebola	not during Ebola	not during Ebola	Dry season birth	none	2nd-3rd			-0.760604		Believes clinic trans or unsure	during Ebola	6.7	0	0	0	0	0	0	1	0
419	1	50	Born at facility	Bassa	Yes	6.1	6.24518	0.316456	0.4375	24	born in village	not during Ebola	not during Ebola	not during Ebola	not during Ebola	Rainy season birth	none	2nd-3rd			-0.54448		Believes clinic trans or unsure	during Ebola	6.1	0	0	0	0	0	0	1	0
1091	3	25	Born at facility	Bassa	Yes	0.1	13.7235	0.151899	0.212121	27	born in village	not during Ebola	not during Ebola	not during Ebola	not during Ebola	Dry season birth	none	2nd-3rd	3	3	-0.316447	2012	not believe clinic trans	not during Ebola	0.1	0	0	1	1	1	0	1	1
446	3	62	Born at facility	English	Yes	2	13.7235	0.151899	0.238636	20	NOT born in village	not during Ebola	not during Ebola	not during Ebola	not during Ebola	Rainy season birth	Some primary	2nd-3rd	1	1	0.219188		Believes clinic trans or unsure	not during Ebola	2	0	0	1	1	0	0	1	1
1351	2	19	Born at facility	English	Yes	6.2	4.20117	0.390625	0.326316	30	born in village	not during Ebola	not during Ebola	not during Ebola	not during Ebola	Dry season birth	Some primary	4th or higher	3	3	0.688202	2012	not believe clinic trans	not during Ebola	6.2	0	0	1	1	1	0	1	1
278	1	69	Not born at facility	Bassa	Yes	15.6	6.24518	0.316456	0.590909	28	born in village	not during Ebola	not during Ebola	not during Ebola	not during Ebola	Rainy season birth	none	2nd-3rd			-0.73		not believe clinic trans	during Ebola	10	5.6	0	0	0	0	0	1	0
1310	2	19	Born at facility	Bassa	No	6.2	4.20117	0.390625	0.326316	24	NOT born in village	not during Ebola	not during Ebola	not during Ebola	not during Ebola	Rainy season birth	none	1st			-0.0091399		Believes clinic trans or unsure	during Ebola	6.2	0	0	0	0	0	0	1	0
1091	3	25	Born at facility	Bassa	Yes	0.1	13.7235	0.151899	0.212121	22	born in village	not during Ebola	not during Ebola	not during Ebola	not during Ebola	Rainy season birth	none	2nd-3rd			-0.316447		not believe clinic trans	during Ebola	0.1	0	0	0	0	0	0	1	0
637	1	6	Not born at facility	English	Yes	10.9	6.24518	0.316456	0.287671	30	born in village	not during Ebola	not during Ebola	not during Ebola	not during Ebola	Dry season birth	Some primary	4th or higher	3	3	0.270085	2013	Believes clinic trans or unsure	not during Ebola	10	0.9	0	1	1	1	1	1	1
898	1	12	Born at facility	English	No	19.1	6.24518	0.316456	0.207237	31	NOT born in village	not during Ebola	not during Ebola	not during Ebola	not during Ebola	Dry season birth	Some Secondary or more	1st			-0.415185		Believes clinic trans or unsure	during Ebola	10	9.1	0	0	0	0	0	1	0
1405	2	35	Not born at facility	Bassa	Yes	11.4	4.20117	0.390625	0.84	20	born in village	not during Ebola	not during Ebola	not during Ebola	not during Ebola	Dry season birth	Some primary	1st		1	-0.325396		not believe clinic trans	not during Ebola	10	1.4	0	0	1	0	0	1	0
888	2	58	Not born at facility	Bassa	No	19.8	4.20117	0.390625	0.28	31	born in village	not during Ebola	not during Ebola	not during Ebola	not during Ebola	Rainy season birth	none	4th or higher			0.111103		not believe clinic trans	during Ebola	10	9.8	0	0	0	0	0	1	0
1364	2	21	Born at facility	Bassa	Yes	6.2	4.20117	0.390625	0.326316	24	born in village	not during Ebola	not during Ebola	not during Ebola	not during Ebola	Rainy season birth	none	2nd-3rd			0.26542		not believe clinic trans	during Ebola	6.2	0	0	0	0	0	0	1	0
539	1	67	Not born at facility	English	Yes	5.6	6.24518	0.316456	0.416667	32	born in village	not during Ebola	not during Ebola	not during Ebola	not during Ebola	Rainy season birth	none	2nd-3rd			0.185621		Believes clinic trans or unsure	during Ebola	5.6	0	0	0	0	0	0	1	0
346	2	28	Born at facility	English	Yes	8.3	4.20117	0.390625	0.411765	37	born in village	not during Ebola	not during Ebola	not during Ebola	not during Ebola	Rainy season birth	Some primary	4th or higher	4	4	0.467961	2011	Believes clinic trans or unsure	not during Ebola	8.3	0	0	1	1	0	0	1	1
94	1	1	Born at facility	English	Yes	20.5	6.24518	0.316456	0.232558	.i	NOT born in village	not during Ebola	not during Ebola	not during Ebola	not during Ebola	Rainy season birth	Some Secondary or more	2nd-3rd			1.83863			during Ebola	10	10.5	0	0	0	0	0	1	0
1420	2	35	Not born at facility	English	Yes	11.4	4.20117	0.390625	0.84	29	born in village	not during Ebola	not during Ebola	not during Ebola	not during Ebola	Rainy season birth	Some primary	4th or higher		3	-0.480088		not believe clinic trans	not during Ebola	10	1.4	0	0	1	0	0	1	0
1175	1	12	Born at facility	English	Yes	19.1	6.24518	0.316456	0.207237	16	NOT born in village	not during Ebola	not during Ebola	not during Ebola	not during Ebola	Rainy season birth	Some primary	1st			0.0852576		not believe clinic trans	during Ebola	10	9.1	0	0	0	0	0	1	0
100	2	39	Not born at facility	Bassa	No	4.9	4.20117	0.390625	0.375	20	born in village	not during Ebola	not during Ebola	not during Ebola	not during Ebola	Rainy season birth	Some primary	1st	1	1	0.456772	2013	not believe clinic trans	not during Ebola	4.9	0	0	1	1	1	1	1	1
443	2	24	Born at facility	Bassa	No	6.7	4.20117	0.390625	0.59375	22	born in village	not during Ebola	not during Ebola	not during Ebola	not during Ebola	Rainy season birth	Some primary	2nd-3rd			-0.231108		Believes clinic trans or unsure	during Ebola	6.7	0	0	0	0	0	0	1	0
18	2	59	Not born at facility	Bassa	Yes	5.5	4.20117	0.390625	0.65625	23	NOT born in village	not during Ebola	not during Ebola	not during Ebola	not during Ebola	Rainy season birth	Some primary	2nd-3rd			-0.740493		Believes clinic trans or unsure	during Ebola	5.5	0	0	0	0	0	0	1	0
1353	2	20	Born at facility	English	Yes	6.2	4.20117	0.390625	0.326316	24	born in village	not during Ebola	not during Ebola	not during Ebola	not during Ebola	Rainy season birth	none	2nd-3rd			0.294831		Believes clinic trans or unsure	during Ebola	6.2	0	0	0	0	0	0	1	0
610	3	52	Born at facility	English	Yes	0.1	13.7235	0.151899	0.0771605	13	born in village	not during Ebola	not during Ebola	not during Ebola	not during Ebola	Rainy season birth	Some Secondary or more	1st			0.519663		not believe clinic trans	during Ebola	0.1	0	0	0	0	0	0	1	0
680	1	4	Not born at facility	Bassa	Yes	5.6	6.24518	0.316456	0.525	.i	born in village	not during Ebola	not during Ebola	not during Ebola	not during Ebola	Rainy season birth	Some primary	1st			0.0046768		not believe clinic trans	during Ebola	5.6	0	0	0	0	0	0	1	0
1041	1	6	Born at facility	English	Yes	10.9	6.24518	0.316456	0.287671	25	NOT born in village	not during Ebola	not during Ebola	not during Ebola	not during Ebola	Dry season birth	none	1st			0.661738		Believes clinic trans or unsure	during Ebola	10	0.9	0	0	0	0	0	1	0
615	1	65	Not born at facility	English	No	5.2	6.24518	0.316456	0.782609	16	born in village	not during Ebola	not during Ebola	not during Ebola	not during Ebola	Dry season birth	none	1st			-0.59964		not believe clinic trans	during Ebola	5.2	0	0	0	0	0	0	1	0
93	3	62	Born at facility	English	Yes	2	13.7235	0.151899	0.238636	23	born in village	not during Ebola	not during Ebola	not during Ebola	not during Ebola	Dry season birth	Some primary	2nd-3rd	2	2	-0.186108	2013	Believes clinic trans or unsure	not during Ebola	2	0	0	1	1	1	1	1	1
141	1	70	Born at facility	Bassa	No	30.8	6.24518	0.316456	0.486486	.i	born in village	not during Ebola	not during Ebola	not during Ebola	not during Ebola	Dry season birth	Some primary	1st			-0.513895		not believe clinic trans	during Ebola	10	11	9.8	0	0	0	0	1	0
1117	2	58	Not born at facility	English	Yes	19.8	4.20117	0.390625	0.28	18	born in village	not during Ebola	not during Ebola	not during Ebola	not during Ebola	Rainy season birth	Some primary	1st			-0.388519		Believes clinic trans or unsure	during Ebola	10	9.8	0	0	0	0	0	1	0
1091	3	25	Born at facility	Bassa	Yes	0.1	13.7235	0.151899	0.212121	27	born in village	not during Ebola	not during Ebola	not during Ebola	not during Ebola	Rainy season birth	none	4th or higher	3	3	-0.316447	2011	not believe clinic trans	not during Ebola	0.1	0	0	1	1	1	0	1	1
1002	2	38	Not born at facility	Bassa	Yes	15.9	4.20117	0.390625	0.446808	16	born in village	not during Ebola	not during Ebola	not during Ebola	not during Ebola	Rainy season birth	none	1st			-0.860736		Believes clinic trans or unsure	during Ebola	10	5.9	0	0	0	0	0	1	0
320	1	47	Not born at facility	Bassa	Yes	8	6.24518	0.316456	0.328125	22	born in village	not during Ebola	not during Ebola	not during Ebola	not during Ebola	Dry season birth	none	4th or higher			-0.612094		Believes clinic trans or unsure	during Ebola	8	0	0	0	0	0	0	1	0
914	3	62	Born at facility	English	Yes	2	13.7235	0.151899	0.238636	19	born in village	not during Ebola	not during Ebola	not during Ebola	not during Ebola	Rainy season birth	Some primary	1st			0.338827		Believes clinic trans or unsure	during Ebola	2	0	0	0	0	0	0	1	0
765	1	70	Not born at facility	Bassa	Yes	32.8	6.24518	0.316456	0.486486	21	born in village	not during Ebola	not during Ebola	not during Ebola	not during Ebola	Dry season birth	none	2nd-3rd			-0.487735		Believes clinic trans or unsure	during Ebola	10	11	11.8	0	0	0	0	1	0
110	2	59	Not born at facility	Bassa	Yes	5.5	4.20117	0.390625	0.65625	24	born in village	not during Ebola	not during Ebola	not during Ebola	not during Ebola	Rainy season birth	Some primary	2nd-3rd	2	2	0.822505	2013	not believe clinic trans	not during Ebola	5.5	0	0	1	1	1	1	1	1
771	1	11	Born at facility	English	Yes	16	6.24518	0.316456	0.2	20	NOT born in village	not during Ebola	not during Ebola	not during Ebola	not during Ebola	Dry season birth	none	2nd-3rd	1	1	0.0507482	2011	Believes clinic trans or unsure	not during Ebola	10	6	0	1	1	0	0	1	1
1471	1	3	Born at facility	English	Yes	18.9	6.24518	0.316456	0.18552	16	born in village	not during Ebola	not during Ebola	not during Ebola	not during Ebola	Dry season birth	Some primary	1st	1	1	-0.59964	2012	Believes clinic trans or unsure	not during Ebola	10	8.9	0	1	1	1	1	1	1
854	2	30	Born at facility	English	Yes	7.5	4.20117	0.390625	0.85	17	born in village	not during Ebola	not during Ebola	not during Ebola	not during Ebola	Rainy season birth	Some primary	1st			-0.163042		not believe clinic trans	during Ebola	7.5	0	0	0	0	0	0	1	0
1276	2	37	Born at facility	Bassa	Yes	6.9	4.20117	0.390625	0.807692	22	born in village	not during Ebola	not during Ebola	not during Ebola	not during Ebola	Dry season birth	none	1st	2	2	-0.860736	2013	Believes clinic trans or unsure	not during Ebola	6.9	0	0	1	1	1	1	1	1
274	1	6	Born at facility	Bassa	No	10.9	6.24518	0.316456	0.287671	14	born in village	not during Ebola	not during Ebola	not during Ebola	not during Ebola	Dry season birth	none	1st			-0.134082		Believes clinic trans or unsure	during Ebola	10	0.9	0	0	0	0	0	1	0
176	3	62	Born at facility	English	Yes	2	13.7235	0.151899	0.238636	15	NOT born in village	not during Ebola	not during Ebola	not during Ebola	not during Ebola	Rainy season birth	Some primary	2nd-3rd			0.494817		Believes clinic trans or unsure	during Ebola	2	0	0	0	0	0	0	1	0
210	1	13	Born at facility	English	Yes	19.1	6.24518	0.316456	0.207237	25	born in village	not during Ebola	not during Ebola	not during Ebola	not during Ebola	Dry season birth	Some primary	4th or higher	2	2	0.822512	2013	Believes clinic trans or unsure	not during Ebola	10	9.1	0	1	1	1	1	1	1
964	2	30	Not born at facility	English	No	7.5	4.20117	0.390625	0.85	26	born in village	not during Ebola	not during Ebola	not during Ebola	not during Ebola	Rainy season birth	none	2nd-3rd		3	-0.574272		not believe clinic trans	not during Ebola	7.5	0	0	0	1	0	0	1	0
1265	2	20	Born at facility	Bassa	Yes	6.2	4.20117	0.390625	0.326316	25	born in village	not during Ebola	not during Ebola	not during Ebola	not during Ebola	Rainy season birth	Some primary	2nd-3rd	2	2	-0.453309	2011	Believes clinic trans or unsure	not during Ebola	6.2	0	0	1	1	0	0	1	1
346	2	28	Not born at facility	English	Yes	8.3	4.20117	0.390625	0.411765	16	born in village	not during Ebola	not during Ebola	not during Ebola	not during Ebola	Rainy season birth	Some primary	1st			0.467961		Believes clinic trans or unsure	during Ebola	8.3	0	0	0	0	0	0	1	0
637	1	6	Not born at facility	English	Yes	10.9	6.24518	0.316456	0.287671	19	born in village	not during Ebola	not during Ebola	not during Ebola	not during Ebola	Rainy season birth	Some primary	1st			0.270085		Believes clinic trans or unsure	during Ebola	10	0.9	0	0	0	0	0	1	0
851	1	13	Not born at facility	English	Yes	19.1	6.24518	0.316456	0.207237	28	NOT born in village	not during Ebola	not during Ebola	not during Ebola	not during Ebola	Dry season birth	none	1st			0.624483		Believes clinic trans or unsure	during Ebola	10	9.1	0	0	0	0	0	1	0
504	1	2	Not born at facility	English	No	18.9	6.24518	0.316456	0.18552	32	NOT born in village	not during Ebola	not during Ebola	not during Ebola	not during Ebola	Rainy season birth	Some primary	1st		4	-0.749645		Believes clinic trans or unsure	not during Ebola	10	8.9	0	0	1	0	0	1	0
1175	1	12	Born at facility	English	Yes	19.1	6.24518	0.316456	0.207237	23	NOT born in village	not during Ebola	not during Ebola	not during Ebola	not during Ebola	Rainy season birth	Some primary	4th or higher	2	2	0.0852576	2012	not believe clinic trans	not during Ebola	10	9.1	0	1	1	1	0	1	1
1427	1	3	Born at facility	Bassa	Yes	18.9	6.24518	0.316456	0.18552	35	born in village	not during Ebola	not during Ebola	not during Ebola	not during Ebola	Dry season birth	none	4th or higher		4	-0.328069		Believes clinic trans or unsure	not during Ebola	10	8.9	0	0	1	0	0	1	0
1388	2	21	Not born at facility	Bassa	Yes	6.2	4.20117	0.390625	0.326316	22	born in village	not during Ebola	not during Ebola	not during Ebola	not during Ebola	Rainy season birth	none	2nd-3rd			-0.0952696		not believe clinic trans	during Ebola	6.2	0	0	0	0	0	0	1	0
846	1	66	Not born at facility	English	Yes	15	6.24518	0.316456	0.653846	22	born in village	not during Ebola	not during Ebola	not during Ebola	not during Ebola	Rainy season birth	none	2nd-3rd			-0.282345		Believes clinic trans or unsure	during Ebola	10	5	0	0	0	0	0	1	0
1430	1	44	Not born at facility	Bassa	Yes	12.4	6.24518	0.316456	0.168	.i	born in village	not during Ebola	not during Ebola	not during Ebola	not during Ebola	Rainy season birth	none	4th or higher			-0.463802		not believe clinic trans	during Ebola	10	2.4	0	0	0	0	0	1	0
588	3	25	Not born at facility	English	Yes	0.1	13.7235	0.151899	0.212121	17	NOT born in village	not during Ebola	not during Ebola	not during Ebola	not during Ebola	Rainy season birth	Some Secondary or more	1st			0.738571		not believe clinic trans	during Ebola	0.1	0	0	0	0	0	0	1	0
1457	2	32	Not born at facility	Bassa	Yes	10.5	4.20117	0.390625	0.588235	28	born in village	not during Ebola	not during Ebola	not during Ebola	not during Ebola	Rainy season birth	Some primary	4th or higher	3	3	-0.609756	2012	not believe clinic trans	not during Ebola	10	0.5	0	1	1	1	1	1	1
335	1	18	Born at facility	Bassa	Yes	9.6	6.24518	0.316456	1	43	born in village	not during Ebola	not during Ebola	not during Ebola	not during Ebola	Rainy season birth	none	1st	4	4	-0.494946	2012	Believes clinic trans or unsure	not during Ebola	9.6	0	0	1	1	1	0	1	1
590	1	8	Born at facility	Bassa	Yes	8.4	6.24518	0.316456	0.35	27	born in village	not during Ebola	not during Ebola	not during Ebola	not during Ebola	Dry season birth	Some primary	2nd-3rd	3	3	0.0224782	2013	not believe clinic trans	not during Ebola	8.4	0	0	1	1	1	1	1	1
1466	1	3	Not born at facility	Bassa	Yes	18.9	6.24518	0.316456	0.18552	35	born in village	not during Ebola	not during Ebola	not during Ebola	not during Ebola	Rainy season birth	none	1st			-0.63239		Believes clinic trans or unsure	during Ebola	10	8.9	0	0	0	0	0	1	0
215	2	60	Not born at facility	Bassa	Yes	5.6	4.20117	0.390625	0.28	22	NOT born in village	not during Ebola	not during Ebola	not during Ebola	not during Ebola	Rainy season birth	none	2nd-3rd	2	2	0.0460832		Believes clinic trans or unsure	not during Ebola	5.6	0	0	1	1	0	0	1	1
1349	3	33	Born at facility	Bassa	Yes	3.4	13.7235	0.151899	0.129231	23	born in village	not during Ebola	not during Ebola	not during Ebola	not during Ebola	Dry season birth	none	1st			0.197408		not believe clinic trans	during Ebola	3.4	0	0	0	0	0	0	1	0
1253	2	21	Born at facility	Bassa	Yes	6.2	4.20117	0.390625	0.326316	14	born in village	not during Ebola	not during Ebola	not during Ebola	not during Ebola	Dry season birth	Some primary	1st			0.0983801		not believe clinic trans	during Ebola	6.2	0	0	0	0	0	0	1	0
149	3	57	Born at facility	Bassa	Yes	4.4	13.7235	0.151899	0.538462	22	born in village	not during Ebola	not during Ebola	not during Ebola	not during Ebola	Dry season birth	Some primary	2nd-3rd	2	2	-0.860736	2013	Believes clinic trans or unsure	not during Ebola	4.4	0	0	1	1	1	1	1	1
965	1	2	Born at facility	English	No	18.9	6.24518	0.316456	0.18552	24	born in village	not during Ebola	not during Ebola	not during Ebola	not during Ebola	Dry season birth	Some Secondary or more	1st	2	2	0.905621	2013	Believes clinic trans or unsure	not during Ebola	10	8.9	0	1	1	1	1	1	1
1091	3	25	Born at facility	Bassa	Yes	0.1	13.7235	0.151899	0.212121	24	born in village	not during Ebola	not during Ebola	not during Ebola	not during Ebola	Rainy season birth	none	2nd-3rd			-0.316447		not believe clinic trans	during Ebola	0.1	0	0	0	0	0	0	1	0
398	3	46	Born at facility	English	Yes	0.1	13.7235	0.151899	0.07	.i	born in village	not during Ebola	not during Ebola	not during Ebola	not during Ebola	Dry season birth	none	1st			-0.359108		Believes clinic trans or unsure	during Ebola	0.1	0	0	0	0	0	0	1	0
465	3	53	Born at facility	English	No	0.1	13.7235	0.151899	0.0771605	21	NOT born in village	not during Ebola	not during Ebola	not during Ebola	not during Ebola	Dry season birth	Some Secondary or more	2nd-3rd			1.38268		Believes clinic trans or unsure	during Ebola	0.1	0	0	0	0	0	0	1	0
934	1	47	Not born at facility	Bassa	No	8	6.24518	0.316456	0.328125	24	born in village	not during Ebola	not during Ebola	not during Ebola	not during Ebola	Rainy season birth	none	2nd-3rd			-0.366129		not believe clinic trans	during Ebola	8	0	0	0	0	0	0	1	0
465	3	53	Born at facility	English	Yes	0.1	13.7235	0.151899	0.0771605	16	born in village	not during Ebola	not during Ebola	not during Ebola	not during Ebola	Dry season birth	Some Secondary or more	2nd-3rd			1.38268		Believes clinic trans or unsure	during Ebola	0.1	0	0	0	0	0	0	1	0
293	2	27	Born at facility	Bassa	Yes	5.2	4.20117	0.390625	0.75	24	born in village	not during Ebola	not during Ebola	not during Ebola	not during Ebola	Rainy season birth	none	2nd-3rd		2	-0.0809531		Believes clinic trans or unsure	not during Ebola	5.2	0	0	0	1	0	0	1	0
1450	2	32	Born at facility	Bassa	Yes	10.5	4.20117	0.390625	0.588235	30	born in village	not during Ebola	not during Ebola	not during Ebola	not during Ebola	Dry season birth	Some primary	2nd-3rd	3	3	-0.749645	2013	not believe clinic trans	not during Ebola	10	0.5	0	1	1	1	1	1	1
1422	2	32	Not born at facility	Bassa	Yes	10.5	4.20117	0.390625	0.588235	20	born in village	not during Ebola	not during Ebola	not during Ebola	not during Ebola	Dry season birth	none	4th or higher	1	1	-0.499006	2013	not believe clinic trans	not during Ebola	10	0.5	0	1	1	1	1	1	1
1077	1	9	Born at facility	Bassa	Yes	5.2	6.24518	0.316456	0.913044	43	born in village	not during Ebola	not during Ebola	not during Ebola	not during Ebola	Dry season birth	none	2nd-3rd			-0.73		Believes clinic trans or unsure	during Ebola	5.2	0	0	0	0	0	0	1	0
1046	1	11	Born at facility	Bassa	Yes	16	6.24518	0.316456	0.2	26	born in village	not during Ebola	not during Ebola	not during Ebola	not during Ebola	Dry season birth	none	2nd-3rd		3	0.803237		Believes clinic trans or unsure	not during Ebola	10	6	0	0	1	0	0	1	0
1424	1	3	Born at facility	English	Yes	18.9	6.24518	0.316456	0.18552	.i	born in village	not during Ebola	not during Ebola	not during Ebola	not during Ebola	Rainy season birth	none	1st			-0.63239		Believes clinic trans or unsure	during Ebola	10	8.9	0	0	0	0	0	1	0
828	1	47	Not born at facility	English	Yes	8	6.24518	0.316456	0.328125	22	born in village	not during Ebola	not during Ebola	not during Ebola	not during Ebola	Dry season birth	Some primary	2nd-3rd		2	-0.169638		Believes clinic trans or unsure	not during Ebola	8	0	0	0	1	0	0	1	0
1364	2	21	Born at facility	Bassa	Yes	6.2	4.20117	0.390625	0.326316	19	born in village	not during Ebola	not during Ebola	not during Ebola	not during Ebola	Rainy season birth	none	2nd-3rd			0.26542		not believe clinic trans	during Ebola	6.2	0	0	0	0	0	0	1	0
1031	2	26	Born at facility	Bassa	Yes	11.2	4.20117	0.390625	0.636364	20	born in village	not during Ebola	not during Ebola	not during Ebola	not during Ebola	Dry season birth	none	1st			-0.860736		not believe clinic trans	during Ebola	10	1.2	0	0	0	0	0	1	0
1096	3	22	Not born at facility	Bassa	Yes	0.1	13.7235	0.151899	0.084	20	born in village	not during Ebola	not during Ebola	not during Ebola	not during Ebola	Rainy season birth	Some primary	2nd-3rd			-0.1651		Believes clinic trans or unsure	during Ebola	0.1	0	0	0	0	0	0	1	0
299	3	40	Born at facility	Bassa	Yes	0.1	13.7235	0.151899	0.308823	24	born in village	not during Ebola	not during Ebola	not during Ebola	not during Ebola	Dry season birth	none	2nd-3rd			-0.226183		Believes clinic trans or unsure	during Ebola	0.1	0	0	0	0	0	0	1	0
963	3	17	Not born at facility	English	Yes	0.1	13.7235	0.151899	0.196262	13	born in village	not during Ebola	not during Ebola	not during Ebola	not during Ebola	Rainy season birth	none	4th or higher			0.18325		Believes clinic trans or unsure	during Ebola	0.1	0	0	0	0	0	0	1	0
1057	2	39	Not born at facility	English	No	4.9	4.20117	0.390625	0.375	22	NOT born in village	not during Ebola	not during Ebola	not during Ebola	not during Ebola	Rainy season birth	Some primary	4th or higher			-0.740493		Believes clinic trans or unsure	during Ebola	4.9	0	0	0	0	0	0	1	0
283	2	38	Not born at facility	Bassa	Yes	15.9	4.20117	0.390625	0.446808	24	born in village	not during Ebola	not during Ebola	not during Ebola	not during Ebola	Rainy season birth	none	2nd-3rd			-0.860736		Believes clinic trans or unsure	during Ebola	10	5.9	0	0	0	0	0	1	0
1014	2	23	Born at facility	Bassa	Yes	5.6	4.20117	0.390625	0.583333	21	born in village	not during Ebola	not during Ebola	not during Ebola	not during Ebola	Dry season birth	none	2nd-3rd	1	1	0.34796	2012	Believes clinic trans or unsure	not during Ebola	5.6	0	0	1	1	1	0	1	1
758	2	24	Born at facility	English	No	6.7	4.20117	0.390625	0.59375	19	born in village	not during Ebola	not during Ebola	not during Ebola	not during Ebola	Rainy season birth	Some primary	1st		1	-0.685364		not believe clinic trans	not during Ebola	6.7	0	0	0	1	0	0	1	0
1012	2	54	Not born at facility	English	Yes	13.7	4.20117	0.390625	0.7	18	born in village	not during Ebola	not during Ebola	not during Ebola	not during Ebola	Rainy season birth	Some primary	2nd-3rd		1	-0.50333		Believes clinic trans or unsure	not during Ebola	10	3.7	0	0	1	0	0	1	0
1480	2	35	Not born at facility	English	Yes	11.4	4.20117	0.390625	0.84	19	born in village	not during Ebola	not during Ebola	not during Ebola	not during Ebola	Dry season birth	Some primary	2nd-3rd			-0.0378358		not believe clinic trans	during Ebola	10	1.4	0	0	0	0	0	1	0
39	1	9	Born at facility	English	Yes	5.2	6.24518	0.316456	0.913044	33	born in village	not during Ebola	not during Ebola	not during Ebola	not during Ebola	Rainy season birth	none	2nd-3rd			-0.860736		Believes clinic trans or unsure	during Ebola	5.2	0	0	0	0	0	0	1	0
1054	1	8	Not born at facility	English	Yes	8.4	6.24518	0.316456	0.35	28	NOT born in village	not during Ebola	not during Ebola	not during Ebola	not during Ebola	Dry season birth	Some Secondary or more	2nd-3rd	3	3	-0.54448	2013	Believes clinic trans or unsure	not during Ebola	8.4	0	0	1	1	1	1	1	1
1001	1	66	Born at facility	English	Yes	15	6.24518	0.316456	0.653846	15	born in village	not during Ebola	not during Ebola	not during Ebola	not during Ebola	Dry season birth	none	4th or higher			-0.530987		not believe clinic trans	during Ebola	10	5	0	0	0	0	0	1	0
747	1	67	Not born at facility	English	Yes	5.6	6.24518	0.316456	0.416667	26	born in village	not during Ebola	not during Ebola	not during Ebola	not during Ebola	Rainy season birth	Some primary	2nd-3rd	3	3	0.318864	2013	not believe clinic trans	not during Ebola	5.6	0	0	1	1	1	1	1	1
1268	2	20	Not born at facility	Bassa	Yes	6.2	4.20117	0.390625	0.326316	21	born in village	not during Ebola	not during Ebola	not during Ebola	not during Ebola	Rainy season birth	Some primary	2nd-3rd			-0.453309		not believe clinic trans	during Ebola	6.2	0	0	0	0	0	0	1	0
1363	3	34	Born at facility	English	Yes	3.4	13.7235	0.151899	0.129231	34	born in village	not during Ebola	not during Ebola	not during Ebola	not during Ebola	Dry season birth	Some primary	1st			-0.0168085		Believes clinic trans or unsure	not during Ebola	3.4	0	0	0	0	0	0	1	0
490	1	67	Not born at facility	Bassa	Yes	5.6	6.24518	0.316456	0.416667	21	born in village	not during Ebola	not during Ebola	not during Ebola	not during Ebola	Dry season birth	none	1st			0.292048		Believes clinic trans or unsure	during Ebola	5.6	0	0	0	0	0	0	1	0
1032	2	38	Born at facility	Bassa	Yes	15.9	4.20117	0.390625	0.446808	23	born in village	not during Ebola	not during Ebola	not during Ebola	not during Ebola	Dry season birth	none	1st	2	2	-0.613457	2011	not believe clinic trans	not during Ebola	10	5.9	0	1	1	0	0	1	1
1204	2	31	Not born at facility	Bassa	Yes	8.2	4.20117	0.390625	0.525	26	born in village	not during Ebola	not during Ebola	not during Ebola	not during Ebola	Dry season birth	Some primary	4th or higher	3	3	-0.59964	2012	not believe clinic trans	not during Ebola	8.2	0	0	1	1	1	0	1	1
1480	2	35	Not born at facility	English	Yes	11.4	4.20117	0.390625	0.84	21	born in village	not during Ebola	not during Ebola	not during Ebola	not during Ebola	Dry season birth	Some primary	2nd-3rd			-0.0378358		not believe clinic trans	during Ebola	10	1.4	0	0	0	0	0	1	0
588	3	25	Not born at facility	English	Yes	0.1	13.7235	0.151899	0.212121	30	NOT born in village	not during Ebola	not during Ebola	not during Ebola	not during Ebola	Dry season birth	Some Secondary or more	2nd-3rd			0.738571		not believe clinic trans	during Ebola	0.1	0	0	0	0	0	0	1	0
1076	1	47	Born at facility	Bassa	Yes	8	6.24518	0.316456	0.328125	31	born in village	not during Ebola	not during Ebola	not during Ebola	not during Ebola	Dry season birth	none	2nd-3rd			-0.108128		Believes clinic trans or unsure	during Ebola	8	0	0	0	0	0	0	1	0
1199	3	53	Born at facility	Bassa	No	0.1	13.7235	0.151899	0.0771605	20	born in village	not during Ebola	not during Ebola	not during Ebola	not during Ebola	Rainy season birth	Some primary	1st			-0.578937		not believe clinic trans	during Ebola	0.1	0	0	0	0	0	0	1	0
801	3	52	Born at facility	English	Yes	0.1	13.7235	0.151899	0.0771605	25	NOT born in village	not during Ebola	not during Ebola	not during Ebola	not during Ebola	Dry season birth	Some Secondary or more	1st		2	2.95009		Believes clinic trans or unsure	not during Ebola	0.1	0	0	0	1	0	0	1	0
191	3	52	Born at facility	English	No	0.1	13.7235	0.151899	0.0771605	22	born in village	not during Ebola	not during Ebola	not during Ebola	not during Ebola	Dry season birth	Some Secondary or more	1st			3.14238		Believes clinic trans or unsure	during Ebola	0.1	0	0	0	0	0	0	1	0
1272	2	21	Not born at facility	Bassa	Yes	6.2	4.20117	0.390625	0.326316	35	born in village	not during Ebola	not during Ebola	not during Ebola	not during Ebola	Rainy season birth	Some primary	1st	4	4	-0.233849		not believe clinic trans	not during Ebola	6.2	0	0	1	1	0	0	1	1
1395	2	20	Born at facility	Bassa	Yes	6.2	4.20117	0.390625	0.326316	17	born in village	not during Ebola	not during Ebola	not during Ebola	not during Ebola	Dry season birth	Some primary	2nd-3rd	1	1	-0.110465	2013	not believe clinic trans	not during Ebola	6.2	0	0	1	1	1	1	1	1
1420	2	35	Not born at facility	English	Yes	11.4	4.20117	0.390625	0.84	14	born in village	not during Ebola	not during Ebola	not during Ebola	not during Ebola	Rainy season birth	Some primary	2nd-3rd			-0.480088		not believe clinic trans	during Ebola	10	1.4	0	0	0	0	0	1	0
175	1	14	Not born at facility	English	Yes	19.1	6.24518	0.316456	0.207237	21	NOT born in village	not during Ebola	not during Ebola	not during Ebola	not during Ebola	Dry season birth	none	1st	1	1	1.20886	2013	Believes clinic trans or unsure	not during Ebola	10	9.1	0	1	1	1	1	1	1
215	2	60	Not born at facility	Bassa	Yes	5.6	4.20117	0.390625	0.28	17	NOT born in village	not during Ebola	not during Ebola	not during Ebola	not during Ebola	Rainy season birth	none	1st			0.0460832		Believes clinic trans or unsure	during Ebola	5.6	0	0	0	0	0	0	1	0
349	2	61	Born at facility	Bassa	Yes	11.6	4.20117	0.390625	0.809524	44	born in village	not during Ebola	not during Ebola	not during Ebola	not during Ebola	Dry season birth	none	2nd-3rd	4	4	-0.161362	2013	not believe clinic trans	not during Ebola	10	1.6	0	1	1	1	1	1	1
1437	2	32	Born at facility	Bassa	Yes	10.5	4.20117	0.390625	0.588235	37	born in village	not during Ebola	not during Ebola	not during Ebola	not during Ebola	Rainy season birth	none	4th or higher	4	4	-0.594162	2013	Believes clinic trans or unsure	not during Ebola	10	0.5	0	1	1	1	1	1	1
99	2	30	Not born at facility	Bassa	Yes	7.5	4.20117	0.390625	0.85	16	born in village	not during Ebola	not during Ebola	not during Ebola	not during Ebola	Rainy season birth	Some primary	1st			-0.860736		Believes clinic trans or unsure	during Ebola	7.5	0	0	0	0	0	0	1	0
305	1	50	Born at facility	Bassa	Yes	6.1	6.24518	0.316456	0.4375	17	born in village	not during Ebola	not during Ebola	not during Ebola	not during Ebola	Dry season birth	none	2nd-3rd			-0.860736		Believes clinic trans or unsure	during Ebola	6.1	0	0	0	0	0	0	1	0
791	1	43	Born at facility	Bassa	No	12.4	6.24518	0.316456	0.168	16	born in village	not during Ebola	not during Ebola	not during Ebola	not during Ebola	Dry season birth	none	2nd-3rd			-0.374702		Believes clinic trans or unsure	during Ebola	10	2.4	0	0	0	0	0	1	0
13	1	50	Born at facility	Bassa	Yes	6.1	6.24518	0.316456	0.4375	20	born in village	not during Ebola	not during Ebola	not during Ebola	not during Ebola	Rainy season birth	Some primary	1st	1	1	-0.860736	2012	not believe clinic trans	not during Ebola	6.1	0	0	1	1	1	0	1	1
1202	2	39	Born at facility	Bassa	Yes	4.9	4.20117	0.390625	0.375	35	NOT born in village	not during Ebola	not during Ebola	not during Ebola	not during Ebola	Dry season birth	Some primary	1st	4	4	0.0685909	2011	not believe clinic trans	not during Ebola	4.9	0	0	1	1	0	0	1	1
335	1	18	Not born at facility	Bassa	Yes	9.6	6.24518	0.316456	1	26	born in village	not during Ebola	not during Ebola	not during Ebola	not during Ebola	Rainy season birth	Some primary	2nd-3rd			-0.494946		Believes clinic trans or unsure	during Ebola	9.6	0	0	0	0	0	0	1	0
1172	1	47	Not born at facility	English	Yes	8	6.24518	0.316456	0.328125	42	born in village	not during Ebola	not during Ebola	not during Ebola	not during Ebola	Dry season birth	none	4th or higher	4	4	0.288383	2012	Believes clinic trans or unsure	not during Ebola	8	0	0	1	1	1	0	1	1
1235	2	19	Not born at facility	English	Yes	6.2	4.20117	0.390625	0.326316	21	born in village	not during Ebola	not during Ebola	not during Ebola	not during Ebola	Rainy season birth	Some primary	4th or higher			0.0327253		not believe clinic trans	during Ebola	6.2	0	0	0	0	0	0	1	0
857	3	25	Born at facility	Bassa	No	0.1	13.7235	0.151899	0.212121	.i	born in village	not during Ebola	not during Ebola	not during Ebola	not during Ebola	Dry season birth	none	1st			-0.0828295		not believe clinic trans	during Ebola	0.1	0	0	0	0	0	0	1	0
846	1	66	Born at facility	English	Yes	15	6.24518	0.316456	0.653846	27	born in village	not during Ebola	not during Ebola	not during Ebola	not during Ebola	Dry season birth	none	4th or higher			-0.282345		Believes clinic trans or unsure	during Ebola	10	5	0	0	0	0	0	1	0
997	2	31	Not born at facility	Bassa	Yes	8.2	4.20117	0.390625	0.525	26	born in village	not during Ebola	not during Ebola	not during Ebola	not during Ebola	Rainy season birth	Some primary	4th or higher	3	3	-0.860736	2011	Believes clinic trans or unsure	not during Ebola	8.2	0	0	1	1	0	0	1	1
1161	1	14	Not born at facility	English	Yes	19.1	6.24518	0.316456	0.207237	17	born in village	not during Ebola	not during Ebola	not during Ebola	not during Ebola	Dry season birth	Some Secondary or more	1st	1	1	0.164594	2012	Believes clinic trans or unsure	not during Ebola	10	9.1	0	1	1	1	0	1	1
480	1	9	Not born at facility	English	Yes	5.2	6.24518	0.316456	0.913044	19	NOT born in village	not during Ebola	not during Ebola	not during Ebola	not during Ebola	Dry season birth	Some primary	2nd-3rd			-0.233849		Believes clinic trans or unsure	during Ebola	5.2	0	0	0	0	0	0	1	0
876	1	67	Born at facility	English	No	5.6	6.24518	0.316456	0.416667	23	born in village	not during Ebola	not during Ebola	not during Ebola	not during Ebola	Dry season birth	Some Secondary or more	1st	2	2	0.319189	2012	not believe clinic trans	not during Ebola	5.6	0	0	1	1	1	0	1	1
1268	2	20	Not born at facility	Bassa	Yes	6.2	4.20117	0.390625	0.326316	19	born in village	not during Ebola	not during Ebola	not during Ebola	not during Ebola	Rainy season birth	Some primary	1st			-0.453309		not believe clinic trans	during Ebola	6.2	0	0	0	0	0	0	1	0
1076	1	47	Born at facility	Bassa	Yes	8	6.24518	0.316456	0.328125	26	born in village	not during Ebola	not during Ebola	not during Ebola	not during Ebola	Rainy season birth	none	2nd-3rd			-0.108128		Believes clinic trans or unsure	during Ebola	8	0	0	0	0	0	0	1	0
1411	1	44	Born at facility	English	Yes	12.4	6.24518	0.316456	0.168	19	born in village	not during Ebola	not during Ebola	not during Ebola	not during Ebola	Dry season birth	none	2nd-3rd		1	-0.364209		Believes clinic trans or unsure	not during Ebola	10	2.4	0	0	1	0	0	1	0
1321	2	21	Born at facility	Bassa	Yes	6.2	4.20117	0.390625	0.326316	24	born in village	not during Ebola	not during Ebola	not during Ebola	not during Ebola	Dry season birth	none	4th or higher	2	2	0.0958707	2011	not believe clinic trans	not during Ebola	6.2	0	0	1	1	0	0	1	1
119	2	63	Born at facility	Bassa	Yes	10	4.20117	0.390625	0.48	36	born in village	not during Ebola	not during Ebola	not during Ebola	not during Ebola	Dry season birth	none	1st	4	4	-0.494946	2011		not during Ebola	10	0	0	1	1	0	0	1	1
1099	1	9	Not born at facility	Bassa	Yes	5.2	6.24518	0.316456	0.913044	28	born in village	not during Ebola	not during Ebola	not during Ebola	not during Ebola	Dry season birth	none	2nd-3rd	3	3	-0.860736	2013	not believe clinic trans	not during Ebola	5.2	0	0	1	1	1	1	1	1
515	2	36	Not born at facility	Bassa	Yes	5.8	4.20117	0.390625	0.761905	21	born in village	not during Ebola	not during Ebola	not during Ebola	not during Ebola	Rainy season birth	none	2nd-3rd			-0.548414		Believes clinic trans or unsure	during Ebola	5.8	0	0	0	0	0	0	1	0
1052	1	9	Born at facility	English	Yes	5.2	6.24518	0.316456	0.913044	22	NOT born in village	not during Ebola	not during Ebola	not during Ebola	not during Ebola	Dry season birth	none	2nd-3rd			-0.136176		Believes clinic trans or unsure	during Ebola	5.2	0	0	0	0	0	0	1	0
780	1	13	Not born at facility	English	Yes	19.1	6.24518	0.316456	0.207237	28	NOT born in village	not during Ebola	not during Ebola	not during Ebola	not during Ebola	Dry season birth	Some Secondary or more	4th or higher			3.01045		not believe clinic trans	during Ebola	10	9.1	0	0	0	0	0	1	0
1278	2	20	Not born at facility	Bassa	Yes	6.2	4.20117	0.390625	0.326316	33	born in village	not during Ebola	not during Ebola	not during Ebola	not during Ebola	Dry season birth	none	4th or higher	4	4	0.633037	2013	Believes clinic trans or unsure	not during Ebola	6.2	0	0	1	1	1	1	1	1
902	1	2	Born at facility	English	Yes	18.9	6.24518	0.316456	0.18552	25	NOT born in village	not during Ebola	not during Ebola	not during Ebola	not during Ebola	Dry season birth	none	2nd-3rd			-0.488548		Believes clinic trans or unsure	during Ebola	10	8.9	0	0	0	0	0	1	0
305	1	50	Born at facility	Bassa	Yes	6.1	6.24518	0.316456	0.4375	16	born in village	not during Ebola	not during Ebola	not during Ebola	not during Ebola	Dry season birth	none	1st			-0.860736		Believes clinic trans or unsure	during Ebola	6.1	0	0	0	0	0	0	1	0
116	1	66	Born at facility	English	Yes	15	6.24518	0.316456	0.653846	18	born in village	not during Ebola	not during Ebola	not during Ebola	not during Ebola	Dry season birth	Some primary	1st			-0.651231		not believe clinic trans	during Ebola	10	5	0	0	0	0	0	1	0
1377	3	34	Not born at facility	Bassa	No	3.4	13.7235	0.151899	0.129231	20	born in village	not during Ebola	not during Ebola	not during Ebola	not during Ebola	Dry season birth	Some primary	2nd-3rd			0.58858		not believe clinic trans	during Ebola	3.4	0	0	0	0	0	0	1	0
1315	2	41	Born at facility	Bassa	Yes	9.4	4.20117	0.390625	0.913044	21	NOT born in village	not during Ebola	not during Ebola	not during Ebola	not during Ebola	Rainy season birth	Some primary	2nd-3rd	1	1	-0.860736	2013	not believe clinic trans	not during Ebola	9.4	0	0	1	1	1	1	1	1
778	1	50	Born at facility	Bassa	Yes	6.1	6.24518	0.316456	0.4375	23	born in village	not during Ebola	not during Ebola	not during Ebola	not during Ebola	Dry season birth	none	2nd-3rd			-0.0226402			during Ebola	6.1	0	0	0	0	0	0	1	0
439	2	27	Born at facility	Bassa	Yes	5.2	4.20117	0.390625	0.75	21	born in village	not during Ebola	not during Ebola	not during Ebola	not during Ebola	Dry season birth	none	4th or higher		1	-0.201197		not believe clinic trans	not during Ebola	5.2	0	0	0	1	0	0	1	0
765	1	70	Not born at facility	Bassa	Yes	32.8	6.24518	0.316456	0.486486	25	born in village	not during Ebola	not during Ebola	not during Ebola	not during Ebola	Dry season birth	none	4th or higher			-0.487735		Believes clinic trans or unsure	during Ebola	10	11	11.8	0	0	0	0	1	0
54	2	30	Not born at facility	English	Yes	7.5	4.20117	0.390625	0.85	34	born in village	not during Ebola	not during Ebola	not during Ebola	not during Ebola	Rainy season birth	Some primary	4th or higher			-0.406105		not believe clinic trans	during Ebola	7.5	0	0	0	0	0	0	1	0
360	1	6	Not born at facility	Bassa	Yes	10.9	6.24518	0.316456	0.287671	.i	NOT born in village	not during Ebola	not during Ebola	not during Ebola	not during Ebola	Rainy season birth	none	2nd-3rd			0.25431		Believes clinic trans or unsure	during Ebola	10	0.9	0	0	0	0	0	1	0
658	3	22	Born at facility	English	No	0.1	13.7235	0.151899	0.084	27	NOT born in village	not during Ebola	not during Ebola	not during Ebola	not during Ebola	Rainy season birth	none	2nd-3rd			-0.369107		not believe clinic trans	during Ebola	0.1	0	0	0	0	0	0	1	0
1480	2	35	Not born at facility	English	Yes	11.4	4.20117	0.390625	0.84	24	born in village	not during Ebola	not during Ebola	not during Ebola	not during Ebola	Rainy season birth	Some primary	4th or higher			-0.0378358		not believe clinic trans	during Ebola	10	1.4	0	0	0	0	0	1	0
1035	3	68	Born at facility	English	Yes	0.1	13.7235	0.151899	0.145833	26	born in village	not during Ebola	not during Ebola	not during Ebola	not during Ebola	Dry season birth	none	4th or higher	3	3	0.892719	2013	not believe clinic trans	not during Ebola	0.1	0	0	1	1	1	1	1	1
1302	2	20	Born at facility	Bassa	Yes	6.2	4.20117	0.390625	0.326316	17	born in village	not during Ebola	not during Ebola	not during Ebola	not during Ebola	Rainy season birth	Some primary	2nd-3rd	1	1	-0.46458	2013	Believes clinic trans or unsure	not during Ebola	6.2	0	0	1	1	1	1	1	1
390	1	9	Born at facility	Bassa	Yes	5.2	6.24518	0.316456	0.913044	30	born in village	not during Ebola	not during Ebola	not during Ebola	not during Ebola	Dry season birth	none	2nd-3rd	3	3	-0.860736	2011	Believes clinic trans or unsure	not during Ebola	5.2	0	0	1	1	0	0	1	1
970	3	25	Born at facility	Bassa	Yes	0.1	13.7235	0.151899	0.212121	23	born in village	not during Ebola	not during Ebola	not during Ebola	not during Ebola	Rainy season birth	Some primary	4th or higher			-0.0584454		not believe clinic trans	during Ebola	0.1	0	0	0	0	0	0	1	0
465	3	53	Not born at facility	English	No	0.1	13.7235	0.151899	0.0771605	24	NOT born in village	not during Ebola	not during Ebola	not during Ebola	not during Ebola	Rainy season birth	Some Secondary or more	2nd-3rd		2	1.38268		Believes clinic trans or unsure	not during Ebola	0.1	0	0	0	1	0	0	1	0
1120	1	66	Not born at facility	English	Yes	15	6.24518	0.316456	0.653846	25	born in village	not during Ebola	not during Ebola	not during Ebola	not during Ebola	Dry season birth	none	1st			-0.378763		Believes clinic trans or unsure	during Ebola	10	5	0	0	0	0	0	1	0
1083	3	25	Born at facility	Bassa	Yes	0.1	13.7235	0.151899	0.212121	25	born in village	not during Ebola	not during Ebola	not during Ebola	not during Ebola	Rainy season birth	Some primary	2nd-3rd		2	0.064872		Believes clinic trans or unsure	not during Ebola	0.1	0	0	0	1	0	0	1	0
888	2	58	Born at facility	Bassa	No	19.8	4.20117	0.390625	0.28	23	born in village	not during Ebola	not during Ebola	not during Ebola	not during Ebola	Rainy season birth	none	1st			0.111103		not believe clinic trans	during Ebola	10	9.8	0	0	0	0	0	1	0
327	1	18	Not born at facility	English	Yes	9.6	6.24518	0.316456	1	24	born in village	not during Ebola	not during Ebola	not during Ebola	not during Ebola	Dry season birth	Some primary	1st	2	2	-0.385424	2011	Believes clinic trans or unsure	not during Ebola	9.6	0	0	1	1	0	0	1	1
1161	1	14	Born at facility	English	No	19.1	6.24518	0.316456	0.207237	24	born in village	not during Ebola	not during Ebola	not during Ebola	not during Ebola	Dry season birth	none	1st	2	2	0.164594	2013	Believes clinic trans or unsure	not during Ebola	10	9.1	0	1	1	1	1	1	1
126	1	47	Born at facility	Bassa	Yes	8	6.24518	0.316456	0.328125	25	born in village	not during Ebola	not during Ebola	not during Ebola	not during Ebola	Rainy season birth	Some primary	4th or higher			-0.388519		Believes clinic trans or unsure	during Ebola	8	0	0	0	0	0	0	1	0
443	2	24	Born at facility	Bassa	No	6.7	4.20117	0.390625	0.59375	24	born in village	not during Ebola	not during Ebola	not during Ebola	not during Ebola	Rainy season birth	Some primary	2nd-3rd		2	-0.231108		Believes clinic trans or unsure	not during Ebola	6.7	0	0	0	1	0	0	1	0
495	3	40	Born at facility	English	Yes	0.1	13.7235	0.151899	0.308823	16	born in village	not during Ebola	not during Ebola	not during Ebola	not during Ebola	Dry season birth	Some primary	1st	1	1	-0.317809	2012	Believes clinic trans or unsure	not during Ebola	0.1	0	0	1	1	1	0	1	1
843	2	56	Born at facility	English	Yes	8.6	4.20117	0.390625	0.709677	26	born in village	not during Ebola	not during Ebola	not during Ebola	not during Ebola	Dry season birth	Some primary	2nd-3rd	3	3	0.0268936	2013	not believe clinic trans	not during Ebola	8.6	0	0	1	1	1	1	1	1
595	1	4	Not born at facility	English	Yes	5.6	6.24518	0.316456	0.525	16	born in village	not during Ebola	not during Ebola	not during Ebola	not during Ebola	Rainy season birth	none	4th or higher			-0.589147		Believes clinic trans or unsure	during Ebola	5.6	0	0	0	0	0	0	1	0
1364	2	21	Not born at facility	Bassa	Yes	6.2	4.20117	0.390625	0.326316	32	born in village	not during Ebola	not during Ebola	not during Ebola	not during Ebola	Dry season birth	Some primary	2nd-3rd			0.26542		not believe clinic trans	during Ebola	6.2	0	0	0	0	0	0	1	0
224	1	43	Not born at facility	Bassa	Yes	12.4	6.24518	0.316456	0.168	18	NOT born in village	not during Ebola	not during Ebola	not during Ebola	not during Ebola	Dry season birth	none	1st			-0.752947		Believes clinic trans or unsure	during Ebola	10	2.4	0	0	0	0	0	1	0
965	1	2	Not born at facility	English	Yes	18.9	6.24518	0.316456	0.18552	12	born in village	not during Ebola	not during Ebola	not during Ebola	not during Ebola	Dry season birth	Some primary	1st			0.905621		Believes clinic trans or unsure	during Ebola	10	8.9	0	0	0	0	0	1	0
407	1	69	Not born at facility	English	Yes	15.6	6.24518	0.316456	0.590909	30	born in village	not during Ebola	not during Ebola	not during Ebola	not during Ebola	Dry season birth	Some primary	4th or higher			-0.860736		not believe clinic trans	during Ebola	10	5.6	0	0	0	0	0	1	0
224	1	43	Not born at facility	Bassa	Yes	12.4	6.24518	0.316456	0.168	20	NOT born in village	not during Ebola	not during Ebola	not during Ebola	not during Ebola	Dry season birth	none	2nd-3rd			-0.752947		Believes clinic trans or unsure	during Ebola	10	2.4	0	0	0	0	0	1	0
166	3	62	Not born at facility	Bassa	Yes	2	13.7235	0.151899	0.238636	16	born in village	not during Ebola	not during Ebola	not during Ebola	not during Ebola	Rainy season birth	Some primary	1st			-0.201197		Believes clinic trans or unsure	during Ebola	2	0	0	0	0	0	0	1	0
320	1	47	Born at facility	Bassa	Yes	8	6.24518	0.316456	0.328125	14	born in village	not during Ebola	not during Ebola	not during Ebola	not during Ebola	Dry season birth	Some primary	1st			-0.612094		Believes clinic trans or unsure	during Ebola	8	0	0	0	0	0	0	1	0
730	2	58	Born at facility	Bassa	Yes	19.8	4.20117	0.390625	0.28	30	born in village	not during Ebola	not during Ebola	not during Ebola	not during Ebola	Dry season birth	none	2nd-3rd	3	3	2.73603	2012	Believes clinic trans or unsure	not during Ebola	10	9.8	0	1	1	1	0	1	1
94	1	1	Born at facility	English	Yes	20.5	6.24518	0.316456	0.232558	18	NOT born in village	not during Ebola	not during Ebola	not during Ebola	not during Ebola	Dry season birth	Some primary	1st		1	1.83863		Believes clinic trans or unsure	not during Ebola	10	10.5	0	0	1	0	0	1	0
274	1	6	Born at facility	Bassa	No	10.9	6.24518	0.316456	0.287671	20	born in village	not during Ebola	not during Ebola	not during Ebola	not during Ebola	Dry season birth	none	2nd-3rd	1	1	-0.134082	2013	Believes clinic trans or unsure	not during Ebola	10	0.9	0	1	1	1	1	1	1
1482	2	32	Not born at facility	Bassa	Yes	10.5	4.20117	0.390625	0.588235	33	born in village	not during Ebola	not during Ebola	not during Ebola	not during Ebola	Dry season birth	none	1st			-0.75431		Believes clinic trans or unsure	during Ebola	10	0.5	0	0	0	0	0	1	0
690	2	54	Born at facility	English	Yes	5.4	4.20117	0.390625	0.7	19	born in village	not during Ebola	not during Ebola	not during Ebola	not during Ebola	Dry season birth	Some primary	1st			3.21082		Believes clinic trans or unsure	during Ebola	5.4	0	0	0	0	0	0	1	0
1216	1	11	Not born at facility	English	Yes	16	6.24518	0.316456	0.2	32	born in village	not during Ebola	not during Ebola	not during Ebola	not during Ebola	Dry season birth	Some primary	2nd-3rd			-0.406362		Believes clinic trans or unsure	during Ebola	10	6	0	0	0	0	0	1	0
413	2	64	Born at facility	Bassa	Yes	7.2	4.20117	0.390625	0.333333	34	born in village	not during Ebola	not during Ebola	not during Ebola	not during Ebola	Dry season birth	Some primary	2nd-3rd			-0.127423		not believe clinic trans	during Ebola	7.2	0	0	0	0	0	0	1	0
289	1	4	Born at facility	English	Yes	5.6	6.24518	0.316456	0.525	27	born in village	not during Ebola	not during Ebola	not during Ebola	not during Ebola	Dry season birth	none	2nd-3rd	3	3	-0.434831	2011	not believe clinic trans	not during Ebola	5.6	0	0	1	1	0	0	1	1
536	1	51	Not born at facility	Bassa	Yes	16.3	6.24518	0.316456	0.365385	28	born in village	not during Ebola	not during Ebola	not during Ebola	not during Ebola	Rainy season birth	none	2nd-3rd	3	3	-0.860736	2011	not believe clinic trans	not during Ebola	10	6.3	0	1	1	0	0	1	1
978	1	43	Born at facility	Bassa	Yes	12.4	6.24518	0.316456	0.168	27	born in village	not during Ebola	not during Ebola	not during Ebola	not during Ebola	Dry season birth	Some primary	2nd-3rd			-0.493213		Believes clinic trans or unsure	during Ebola	10	2.4	0	0	0	0	0	1	0
26	2	27	Not born at facility	Bassa	Yes	5.2	4.20117	0.390625	0.75	38	born in village	not during Ebola	not during Ebola	not during Ebola	not during Ebola	Rainy season birth	none	4th or higher		4	-0.0786077		Believes clinic trans or unsure	not during Ebola	5.2	0	0	0	1	0	0	1	0
1383	2	20	Born at facility	Bassa	No	6.2	4.20117	0.390625	0.326316	21	NOT born in village	not during Ebola	not during Ebola	not during Ebola	not during Ebola	Dry season birth	Some Secondary or more	2nd-3rd			-0.613457		Believes clinic trans or unsure	during Ebola	6.2	0	0	0	0	0	0	1	0
173	1	47	Not born at facility	Bassa	No	8	6.24518	0.316456	0.328125	17	NOT born in village	not during Ebola	not during Ebola	not during Ebola	not during Ebola	Dry season birth	Some primary	1st	1	1	0.87881	2011	not believe clinic trans	not during Ebola	8	0	0	1	1	0	0	1	1
1351	2	19	Born at facility	English	Yes	6.2	4.20117	0.390625	0.326316	13	born in village	not during Ebola	not during Ebola	not during Ebola	not during Ebola	Rainy season birth	Some primary	2nd-3rd			0.688202		not believe clinic trans	during Ebola	6.2	0	0	0	0	0	0	1	0
56	1	4	Not born at facility	Bassa	Yes	5.6	6.24518	0.316456	0.525	19	born in village	not during Ebola	not during Ebola	not during Ebola	not during Ebola	Rainy season birth	none	1st			-0.513993		Believes clinic trans or unsure	during Ebola	5.6	0	0	0	0	0	0	1	0
238	2	38	Not born at facility	Bassa	Yes	15.9	4.20117	0.390625	0.446808	26	born in village	not during Ebola	not during Ebola	not during Ebola	not during Ebola	Rainy season birth	Some primary	2nd-3rd	3	3	-0.724898	2012	Believes clinic trans or unsure	not during Ebola	10	5.9	0	1	1	1	0	1	1
234	3	53	Not born at facility	English	No	0.1	13.7235	0.151899	0.0771605	17	born in village	not during Ebola	not during Ebola	not during Ebola	not during Ebola	Dry season birth	Some Secondary or more	1st			2.47437		Believes clinic trans or unsure	during Ebola	0.1	0	0	0	0	0	0	1	0
721	2	58	Born at facility	English	Yes	19.8	4.20117	0.390625	0.28	16	born in village	not during Ebola	not during Ebola	not during Ebola	not during Ebola	Rainy season birth	Some Secondary or more	1st	1	1	-0.116929	2012	not believe clinic trans	not during Ebola	10	9.8	0	1	1	1	0	1	1
940	2	27	Not born at facility	Bassa	No	5.2	4.20117	0.390625	0.75	35	born in village	not during Ebola	not during Ebola	not during Ebola	not during Ebola	Rainy season birth	none	1st			0.348685		not believe clinic trans	during Ebola	5.2	0	0	0	0	0	0	1	0
534	1	8	Born at facility	English	No	8.4	6.24518	0.316456	0.35	18	born in village	not during Ebola	not during Ebola	not during Ebola	not during Ebola	Dry season birth	Some primary	1st	1	1	-0.749645	2012	not believe clinic trans	not during Ebola	8.4	0	0	1	1	1	0	1	1
490	1	67	Not born at facility	Bassa	Yes	5.6	6.24518	0.316456	0.416667	26	born in village	not during Ebola	not during Ebola	not during Ebola	not during Ebola	Rainy season birth	none	2nd-3rd			0.292048		Believes clinic trans or unsure	during Ebola	5.6	0	0	0	0	0	0	1	0
839	3	53	Born at facility	English	No	0.1	13.7235	0.151899	0.0771605	22	NOT born in village	not during Ebola	not during Ebola	not during Ebola	not during Ebola	Dry season birth	Some Secondary or more	1st			1.53353		Believes clinic trans or unsure	during Ebola	0.1	0	0	0	0	0	0	1	0
1068	2	60	Born at facility	Bassa	Yes	5.6	4.20117	0.390625	0.28	34	born in village	not during Ebola	not during Ebola	not during Ebola	not during Ebola	Rainy season birth	none	2nd-3rd	4	4	-0.736169	2013		not during Ebola	5.6	0	0	1	1	1	1	1	1
208	2	55	Not born at facility	English	Yes	18.4	4.20117	0.390625	0.565217	25	born in village	not during Ebola	not during Ebola	not during Ebola	not during Ebola	Dry season birth	none	1st			-0.493213		Believes clinic trans or unsure	during Ebola	10	8.4	0	0	0	0	0	1	0
41	3	62	Born at facility	English	Yes	2	13.7235	0.151899	0.238636	20	born in village	not during Ebola	not during Ebola	not during Ebola	not during Ebola	Dry season birth	Some primary	4th or higher			-0.201197		Believes clinic trans or unsure	during Ebola	2	0	0	0	0	0	0	1	0
64	1	1	Born at facility	English	Yes	20.5	6.24518	0.316456	0.232558	17	NOT born in village	not during Ebola	not during Ebola	not during Ebola	not during Ebola	Rainy season birth	Some Secondary or more	1st			1.57205		Believes clinic trans or unsure	during Ebola	10	10.5	0	0	0	0	0	1	0
1430	1	44	Not born at facility	Bassa	Yes	12.4	6.24518	0.316456	0.168	19	born in village	not during Ebola	not during Ebola	not during Ebola	not during Ebola	Rainy season birth	none	4th or higher			-0.463802		not believe clinic trans	during Ebola	10	2.4	0	0	0	0	0	1	0
1174	2	54	Born at facility	English	No	5.4	4.20117	0.390625	0.7	18	NOT born in village	not during Ebola	not during Ebola	not during Ebola	not during Ebola	Dry season birth	Some Secondary or more	1st			2.03721		Believes clinic trans or unsure	during Ebola	5.4	0	0	0	0	0	0	1	0
1015	1	18	Not born at facility	Bassa	Yes	9.6	6.24518	0.316456	1	26	born in village	not during Ebola	not during Ebola	not during Ebola	not during Ebola	Rainy season birth	Some primary	1st	3	3	-0.740493	2013	not believe clinic trans	not during Ebola	9.6	0	0	1	1	1	1	1	1
1315	2	41	Born at facility	Bassa	Yes	9.4	4.20117	0.390625	0.913044	18	NOT born in village	not during Ebola	not during Ebola	not during Ebola	not during Ebola	Rainy season birth	Some primary	2nd-3rd		1	-0.860736		not believe clinic trans	not during Ebola	9.4	0	0	0	1	0	0	1	0
32	2	56	Born at facility	English	No	8.6	4.20117	0.390625	0.709677	14	born in village	not during Ebola	not during Ebola	not during Ebola	not during Ebola	Dry season birth	Some primary	1st			0.120203		not believe clinic trans	during Ebola	8.6	0	0	0	0	0	0	1	0
1152	1	16	Not born at facility	Bassa	Yes	5.5	6.24518	0.316456	0.538462	14	born in village	not during Ebola	not during Ebola	not during Ebola	not during Ebola	Rainy season birth	Some primary	2nd-3rd			-0.860736		Believes clinic trans or unsure	during Ebola	5.5	0	0	0	0	0	0	1	0
57	1	11	Born at facility	English	Yes	16	6.24518	0.316456	0.2	32	born in village	not during Ebola	not during Ebola	not during Ebola	not during Ebola	Rainy season birth	none	2nd-3rd		4	1.25084		Believes clinic trans or unsure	not during Ebola	10	6	0	0	1	0	0	1	0
197	2	55	Not born at facility	English	Yes	18.4	4.20117	0.390625	0.565217	20	NOT born in village	not during Ebola	not during Ebola	not during Ebola	not during Ebola	Dry season birth	Some primary	1st	1	1	-0.130861	2013	Believes clinic trans or unsure	not during Ebola	10	8.4	0	1	1	1	1	1	1
1321	2	21	Born at facility	Bassa	Yes	6.2	4.20117	0.390625	0.326316	14	born in village	not during Ebola	not during Ebola	not during Ebola	not during Ebola	Rainy season birth	Some primary	1st			0.0958707		not believe clinic trans	during Ebola	6.2	0	0	0	0	0	0	1	0
1192	1	5	Born at facility	English	Yes	29.3	6.24518	0.316456	0.642857	23	born in village	not during Ebola	not during Ebola	not during Ebola	not during Ebola	Dry season birth	Some Secondary or more	1st			-0.415185		Believes clinic trans or unsure	during Ebola	10	11	8.3	0	0	0	0	1	0
912	3	57	Not born at facility	Bassa	No	4.4	13.7235	0.151899	0.538462	31	born in village	not during Ebola	not during Ebola	not during Ebola	not during Ebola	Rainy season birth	none	4th or higher			-0.157693		Believes clinic trans or unsure	during Ebola	4.4	0	0	0	0	0	0	1	0
850	1	49	Not born at facility	Bassa	No	16.9	6.24518	0.316456	0.714286	34	born in village	not during Ebola	not during Ebola	not during Ebola	not during Ebola	Dry season birth	none	1st		4	-0.590155		not believe clinic trans	not during Ebola	10	6.9	0	0	1	0	0	1	0
363	3	68	Born at facility	English	No	0.1	13.7235	0.151899	0.145833	23	NOT born in village	not during Ebola	not during Ebola	not during Ebola	not during Ebola	Rainy season birth	Some primary	1st			0.743418		not believe clinic trans	during Ebola	0.1	0	0	0	0	0	0	1	0
1171	3	22	Born at facility	English	Yes	0.1	13.7235	0.151899	0.084	15	born in village	not during Ebola	not during Ebola	not during Ebola	not during Ebola	Dry season birth	Some primary	1st	1	1	-0.295837		not believe clinic trans	not during Ebola	0.1	0	0	1	1	0	0	1	1
1031	2	26	Born at facility	Bassa	Yes	11.2	4.20117	0.390625	0.636364	24	born in village	not during Ebola	not during Ebola	not during Ebola	not during Ebola	Dry season birth	none	2nd-3rd			-0.860736		not believe clinic trans	during Ebola	10	1.2	0	0	0	0	0	1	0
997	2	31	Not born at facility	Bassa	Yes	8.2	4.20117	0.390625	0.525	22	born in village	not during Ebola	not during Ebola	not during Ebola	not during Ebola	Rainy season birth	Some primary	2nd-3rd			-0.860736		Believes clinic trans or unsure	during Ebola	8.2	0	0	0	0	0	0	1	0
344	1	12	Born at facility	English	No	19.1	6.24518	0.316456	0.207237	12	NOT born in village	not during Ebola	not during Ebola	not during Ebola	not during Ebola	Dry season birth	Some Secondary or more	1st			-0.643218		not believe clinic trans	during Ebola	10	9.1	0	0	0	0	0	1	0
480	1	9	Born at facility	English	Yes	5.2	6.24518	0.316456	0.913044	22	NOT born in village	not during Ebola	not during Ebola	not during Ebola	not during Ebola	Dry season birth	Some primary	4th or higher	2	2	-0.233849	2011	Believes clinic trans or unsure	not during Ebola	5.2	0	0	1	1	1	0	1	1
1128	1	14	Born at facility	Bassa	Yes	19.1	6.24518	0.316456	0.207237	.i	born in village	not during Ebola	not during Ebola	not during Ebola	not during Ebola	Rainy season birth	Some primary	1st			0.851208		Believes clinic trans or unsure	during Ebola	10	9.1	0	0	0	0	0	1	0
867	1	45	Born at facility	Bassa	Yes	20.9	6.24518	0.316456	0.333333	19	NOT born in village	not during Ebola	not during Ebola	not during Ebola	not during Ebola	Rainy season birth	none	2nd-3rd	1	1	-0.367492	2011	Believes clinic trans or unsure	not during Ebola	10	10.9	0	1	1	0	0	1	1
843	2	56	Born at facility	English	Yes	8.6	4.20117	0.390625	0.709677	13	born in village	not during Ebola	not during Ebola	not during Ebola	not during Ebola	Rainy season birth	Some primary	1st			0.0268936		not believe clinic trans	during Ebola	8.6	0	0	0	0	0	0	1	0
777	1	69	Not born at facility	Bassa	Yes	15.6	6.24518	0.316456	0.590909	20	born in village	not during Ebola	not during Ebola	not during Ebola	not during Ebola	Rainy season birth	none	2nd-3rd			-0.486372		not believe clinic trans	during Ebola	10	5.6	0	0	0	0	0	1	0
1306	2	21	Born at facility	Bassa	Yes	6.2	4.20117	0.390625	0.326316	20	born in village	not during Ebola	not during Ebola	not during Ebola	not during Ebola	Dry season birth	Some primary	2nd-3rd			-0.228371		Believes clinic trans or unsure	not during Ebola	6.2	0	0	0	0	0	0	1	0
804	2	29	Born at facility	Bassa	Yes	19.6	4.20117	0.390625	0.62069	32	born in village	not during Ebola	not during Ebola	not during Ebola	not during Ebola	Dry season birth	none	4th or higher			-0.740493		not believe clinic trans	during Ebola	10	9.6	0	0	0	0	0	1	0
48	2	23	Not born at facility	English	No	5.6	4.20117	0.390625	0.583333	19	born in village	not during Ebola	not during Ebola	not during Ebola	not during Ebola	Rainy season birth	Some primary	1st			-0.211784		not believe clinic trans	during Ebola	5.6	0	0	0	0	0	0	1	0
715	2	29	Not born at facility	Bassa	Yes	19.6	4.20117	0.390625	0.62069	30	born in village	not during Ebola	not during Ebola	not during Ebola	not during Ebola	Dry season birth	Some primary	4th or higher			-0.689267		Believes clinic trans or unsure	during Ebola	10	9.6	0	0	0	0	0	1	0
967	2	31	Born at facility	Bassa	Yes	8.2	4.20117	0.390625	0.525	19	born in village	not during Ebola	not during Ebola	not during Ebola	not during Ebola	Dry season birth	Some primary	1st		1	-0.382122		not believe clinic trans	not during Ebola	8.2	0	0	0	1	0	0	1	0
934	1	47	Not born at facility	Bassa	No	8	6.24518	0.316456	0.328125	29	born in village	not during Ebola	not during Ebola	not during Ebola	not during Ebola	Dry season birth	none	4th or higher			-0.366129		not believe clinic trans	during Ebola	8	0	0	0	0	0	0	1	0
40	2	56	Not born at facility	Bassa	No	8.6	4.20117	0.390625	0.709677	.i	born in village	not during Ebola	not during Ebola	not during Ebola	not during Ebola	Dry season birth	none	1st			-0.578937		not believe clinic trans	during Ebola	8.6	0	0	0	0	0	0	1	0
939	1	4	Not born at facility	English	Yes	5.6	6.24518	0.316456	0.525	26	born in village	not during Ebola	not during Ebola	not during Ebola	not during Ebola	Dry season birth	Some primary	1st			-0.283383		Believes clinic trans or unsure	during Ebola	5.6	0	0	0	0	0	0	1	0
529	2	30	Not born at facility	Bassa	Yes	7.5	4.20117	0.390625	0.85	39	born in village	not during Ebola	not during Ebola	not during Ebola	not during Ebola	Rainy season birth	none	4th or higher	4	4	-0.860736	2011	not believe clinic trans	not during Ebola	7.5	0	0	1	1	0	0	1	1
991	3	17	Born at facility	English	Yes	0.1	13.7235	0.151899	0.196262	31	born in village	not during Ebola	not during Ebola	not during Ebola	not during Ebola	Dry season birth	Some primary	4th or higher			-0.257912		Believes clinic trans or unsure	during Ebola	0.1	0	0	0	0	0	0	1	0
559	2	27	Born at facility	Bassa	Yes	5.2	4.20117	0.390625	0.75	34	born in village	not during Ebola	not during Ebola	not during Ebola	not during Ebola	Dry season birth	none	4th or higher			0.190636		not believe clinic trans	during Ebola	5.2	0	0	0	0	0	0	1	0
199	1	10	Born at facility	English	Yes	24.2	6.24518	0.316456	0.2625	20	born in village	not during Ebola	not during Ebola	not during Ebola	not during Ebola	Dry season birth	none	2nd-3rd	1	1	-0.613457	2012	Believes clinic trans or unsure	not during Ebola	10	11	3.2	1	1	1	0	1	1
442	3	62	Not born at facility	English	Yes	2	13.7235	0.151899	0.238636	30	NOT born in village	not during Ebola	not during Ebola	not during Ebola	not during Ebola	Dry season birth	none	4th or higher			0.880197		Believes clinic trans or unsure	during Ebola	2	0	0	0	0	0	0	1	0
1351	2	19	Born at facility	English	Yes	6.2	4.20117	0.390625	0.326316	30	born in village	not during Ebola	not during Ebola	not during Ebola	not during Ebola	Dry season birth	Some primary	4th or higher	3	3	0.688202	2012	not believe clinic trans	not during Ebola	6.2	0	0	1	1	1	0	1	1
834	1	10	Not born at facility	English	No	24.2	6.24518	0.316456	0.2625	20	born in village	not during Ebola	not during Ebola	not during Ebola	not during Ebola	Dry season birth	Some primary	1st	1	1	0.799656	2011	Believes clinic trans or unsure	not during Ebola	10	11	3.2	1	1	0	0	1	1
1001	1	66	Born at facility	English	Yes	15	6.24518	0.316456	0.653846	.i	born in village	not during Ebola	not during Ebola	not during Ebola	not during Ebola	Dry season birth	none	1st			-0.530987		not believe clinic trans	during Ebola	10	5	0	0	0	0	0	1	0
159	1	49	Not born at facility	English	Yes	16.9	6.24518	0.316456	0.714286	30	born in village	not during Ebola	not during Ebola	not during Ebola	not during Ebola	Dry season birth	none	4th or higher			-0.613457		Believes clinic trans or unsure	during Ebola	10	6.9	0	0	0	0	0	1	0
856	2	24	Not born at facility	Bassa	Yes	6.7	4.20117	0.390625	0.59375	18	born in village	not during Ebola	not during Ebola	not during Ebola	not during Ebola	Rainy season birth	Some primary	2nd-3rd			-0.363669		not believe clinic trans	during Ebola	6.7	0	0	0	0	0	0	1	0
950	3	57	Born at facility	Bassa	Yes	4.4	13.7235	0.151899	0.538462	16	born in village	not during Ebola	not during Ebola	not during Ebola	not during Ebola	Rainy season birth	none	1st			-0.584045		Believes clinic trans or unsure	during Ebola	4.4	0	0	0	0	0	0	1	0
358	1	1	Born at facility	English	Yes	20.5	6.24518	0.316456	0.232558	17	NOT born in village	not during Ebola	not during Ebola	not during Ebola	not during Ebola	Rainy season birth	Some Secondary or more	1st			3.20411		Believes clinic trans or unsure	during Ebola	10	10.5	0	0	0	0	0	1	0
1420	2	35	Not born at facility	English	Yes	11.4	4.20117	0.390625	0.84	29	born in village	not during Ebola	not during Ebola	not during Ebola	not during Ebola	Rainy season birth	Some primary	4th or higher		3	-0.480088		not believe clinic trans	not during Ebola	10	1.4	0	0	1	0	0	1	0
845	1	70	Not born at facility	Bassa	Yes	32.8	6.24518	0.316456	0.486486	24	born in village	not during Ebola	not during Ebola	not during Ebola	not during Ebola	Dry season birth	none	2nd-3rd	2	2	0.0225699	2011	Believes clinic trans or unsure	not during Ebola	10	11	11.8	1	1	1	0	1	1
780	1	13	Born at facility	English	Yes	19.1	6.24518	0.316456	0.207237	14	NOT born in village	not during Ebola	not during Ebola	not during Ebola	not during Ebola	Dry season birth	Some Secondary or more	1st			3.01045		not believe clinic trans	during Ebola	10	9.1	0	0	0	0	0	1	0
287	3	62	Born at facility	Bassa	Yes	2	13.7235	0.151899	0.238636	24	born in village	not during Ebola	not during Ebola	not during Ebola	not during Ebola	Rainy season birth	Some primary	2nd-3rd	2	2	0.0359668	2013	not believe clinic trans	not during Ebola	2	0	0	1	1	1	1	1	1
869	1	10	Born at facility	English	Yes	24.2	6.24518	0.316456	0.2625	23	born in village	not during Ebola	not during Ebola	not during Ebola	not during Ebola	Dry season birth	none	2nd-3rd		2	-0.749645		Believes clinic trans or unsure	not during Ebola	10	11	3.2	0	1	0	0	1	0
264	2	61	Born at facility	Bassa	Yes	11.6	4.20117	0.390625	0.809524	23	born in village	not during Ebola	not during Ebola	not during Ebola	not during Ebola	Rainy season birth	none	1st	2	2	-0.860736	2013	Believes clinic trans or unsure	not during Ebola	10	1.6	0	1	1	1	1	1	1
695	3	46	Born at facility	English	No	0.1	13.7235	0.151899	0.07	30	born in village	not during Ebola	not during Ebola	not during Ebola	not during Ebola	Dry season birth	Some primary	1st			0.541494		not believe clinic trans	during Ebola	0.1	0	0	0	0	0	0	1	0
1011	2	39	Not born at facility	Bassa	Yes	4.9	4.20117	0.390625	0.375	27	born in village	not during Ebola	not during Ebola	not during Ebola	not during Ebola	Rainy season birth	none	4th or higher	3	3	-0.860736		not believe clinic trans	not during Ebola	4.9	0	0	1	1	0	0	1	1
539	1	67	Born at facility	English	Yes	5.6	6.24518	0.316456	0.416667	19	NOT born in village	not during Ebola	not during Ebola	not during Ebola	not during Ebola	Rainy season birth	Some Secondary or more	1st	1	1	0.185621	2013	not believe clinic trans	not during Ebola	5.6	0	0	1	1	1	1	1	1
1253	2	21	Not born at facility	Bassa	Yes	6.2	4.20117	0.390625	0.326316	18	born in village	not during Ebola	not during Ebola	not during Ebola	not during Ebola	Rainy season birth	Some primary	2nd-3rd	1	1	0.0983801	2012	not believe clinic trans	not during Ebola	6.2	0	0	1	1	1	1	1	1
46	2	58	Born at facility	Bassa	No	19.8	4.20117	0.390625	0.28	30	born in village	not during Ebola	not during Ebola	not during Ebola	not during Ebola	Dry season birth	none	2nd-3rd			-0.721441		not believe clinic trans	during Ebola	10	9.8	0	0	0	0	0	1	0
149	3	57	Not born at facility	Bassa	Yes	4.4	13.7235	0.151899	0.538462	20	born in village	not during Ebola	not during Ebola	not during Ebola	not during Ebola	Rainy season birth	Some primary	2nd-3rd	1	1	-0.860736	2011	Believes clinic trans or unsure	not during Ebola	4.4	0	0	1	1	1	0	1	1
1409	2	32	Not born at facility	Bassa	Yes	10.5	4.20117	0.390625	0.588235	.i	born in village	not during Ebola	not during Ebola	not during Ebola	not during Ebola	Rainy season birth	none	1st			-0.605433		not believe clinic trans	during Ebola	10	0.5	0	0	0	0	0	1	0
706	1	43	Born at facility	Bassa	Yes	12.4	6.24518	0.316456	0.168	24	NOT born in village	not during Ebola	not during Ebola	not during Ebola	not during Ebola	Dry season birth	none	2nd-3rd	2	2	-0.59964	2011	Believes clinic trans or unsure	not during Ebola	10	2.4	0	1	1	0	0	1	1
28	1	45	Not born at facility	English	No	20.9	6.24518	0.316456	0.333333	16	born in village	not during Ebola	not during Ebola	not during Ebola	not during Ebola	Rainy season birth	none	1st			-0.685364		Believes clinic trans or unsure	during Ebola	10	10.9	0	0	0	0	0	1	0
532	2	60	Born at facility	English	Yes	5.6	4.20117	0.390625	0.28	24	born in village	not during Ebola	not during Ebola	not during Ebola	not during Ebola	Dry season birth	none	2nd-3rd			-0.468903		not believe clinic trans	during Ebola	5.6	0	0	0	0	0	0	1	0
1025	3	25	Not born at facility	Bassa	Yes	0.1	13.7235	0.151899	0.212121	16	NOT born in village	not during Ebola	not during Ebola	not during Ebola	not during Ebola	Rainy season birth	Some primary	1st		1	-0.176956		not believe clinic trans	not during Ebola	0.1	0	0	0	1	0	0	1	0
1214	2	60	Born at facility	English	No	5.6	4.20117	0.390625	0.28	21	born in village	not during Ebola	not during Ebola	not during Ebola	not during Ebola	Dry season birth	none	2nd-3rd		1	1.14504		Believes clinic trans or unsure	not during Ebola	5.6	0	0	0	1	0	0	1	0
546	2	54	Born at facility	Bassa	Yes	13.7	4.20117	0.390625	0.7	18	born in village	not during Ebola	not during Ebola	not during Ebola	not during Ebola	Dry season birth	Some primary	1st			-0.326568		Believes clinic trans or unsure	during Ebola	10	3.7	0	0	0	0	0	1	0
253	1	16	Not born at facility	Bassa	Yes	5.5	6.24518	0.316456	0.538462	24	born in village	not during Ebola	not during Ebola	not during Ebola	not during Ebola	Rainy season birth	Some primary	2nd-3rd			-0.719883		Believes clinic trans or unsure	during Ebola	5.5	0	0	0	0	0	0	1	0
750	1	18	Not born at facility	Bassa	Yes	9.6	6.24518	0.316456	1	19	born in village	not during Ebola	not during Ebola	not during Ebola	not during Ebola	Dry season birth	Some primary	4th or higher			-0.473918		Believes clinic trans or unsure	during Ebola	9.6	0	0	0	0	0	0	1	0
735	1	49	Not born at facility	Bassa	Yes	16.9	6.24518	0.316456	0.714286	38	born in village	not during Ebola	not during Ebola	not during Ebola	not during Ebola	Rainy season birth	none	1st	4	4	-0.860736	2011	not believe clinic trans	not during Ebola	10	6.9	0	1	1	0	0	1	1
1227	2	19	Not born at facility	Bassa	Yes	6.2	4.20117	0.390625	0.326316	22	born in village	not during Ebola	not during Ebola	not during Ebola	not during Ebola	Dry season birth	Some primary	2nd-3rd	2	2	0.816731	2011	Believes clinic trans or unsure	not during Ebola	6.2	0	0	1	1	1	0	1	1
476	2	28	Not born at facility	Bassa	Yes	8.3	4.20117	0.390625	0.411765	17	born in village	not during Ebola	not during Ebola	not during Ebola	not during Ebola	Rainy season birth	none	1st			0.556427		not believe clinic trans	during Ebola	8.3	0	0	0	0	0	0	1	0
224	1	43	Born at facility	Bassa	Yes	12.4	6.24518	0.316456	0.168	27	NOT born in village	not during Ebola	not during Ebola	not during Ebola	not during Ebola	Rainy season birth	none	4th or higher		3	-0.752947		Believes clinic trans or unsure	not during Ebola	10	2.4	0	0	1	0	0	1	0
143	2	63	Born at facility	Bassa	Yes	10	4.20117	0.390625	0.48	39	born in village	not during Ebola	not during Ebola	not during Ebola	not during Ebola	Dry season birth	none	2nd-3rd			-0.0411183		not believe clinic trans	during Ebola	10	0	0	0	0	0	0	1	0
1174	2	54	Not born at facility	English	No	5.4	4.20117	0.390625	0.7	26	NOT born in village	not during Ebola	not during Ebola	not during Ebola	not during Ebola	Rainy season birth	none	2nd-3rd			2.03721		Believes clinic trans or unsure	during Ebola	5.4	0	0	0	0	0	0	1	0
1260	2	21	Not born at facility	Bassa	Yes	6.2	4.20117	0.390625	0.326316	18	born in village	not during Ebola	not during Ebola	not during Ebola	not during Ebola	Dry season birth	Some primary	1st			0.003314		not believe clinic trans	during Ebola	6.2	0	0	0	0	0	0	1	0
736	2	60	Born at facility	Bassa	Yes	5.6	4.20117	0.390625	0.28	15	NOT born in village	not during Ebola	not during Ebola	not during Ebola	not during Ebola	Rainy season birth	none	1st			-0.201197		Believes clinic trans or unsure	during Ebola	5.6	0	0	0	0	0	0	1	0
898	1	12	Born at facility	English	No	19.1	6.24518	0.316456	0.207237	36	NOT born in village	not during Ebola	not during Ebola	not during Ebola	not during Ebola	Rainy season birth	Some Secondary or more	2nd-3rd	4	4	-0.415185	2013	Believes clinic trans or unsure	not during Ebola	10	9.1	0	1	1	1	1	1	1
1207	1	15	Not born at facility	Bassa	Yes	24.5	6.24518	0.316456	0.625	.i	born in village	not during Ebola	not during Ebola	not during Ebola	not during Ebola	Dry season birth	Some primary	1st			0.808328		not believe clinic trans	during Ebola	10	11	3.5	0	0	0	0	1	0
1175	1	12	Born at facility	English	Yes	19.1	6.24518	0.316456	0.207237	18	NOT born in village	not during Ebola	not during Ebola	not during Ebola	not during Ebola	Dry season birth	Some primary	2nd-3rd			0.0852576		not believe clinic trans	during Ebola	10	9.1	0	0	0	0	0	1	0
299	3	40	Born at facility	Bassa	Yes	0.1	13.7235	0.151899	0.308823	27	born in village	not during Ebola	not during Ebola	not during Ebola	not during Ebola	Dry season birth	none	2nd-3rd	3	3	-0.226183		Believes clinic trans or unsure	not during Ebola	0.1	0	0	1	1	0	0	1	1
1407	1	44	Born at facility	English	Yes	12.4	6.24518	0.316456	0.168	17	NOT born in village	not during Ebola	not during Ebola	not during Ebola	not during Ebola	Dry season birth	none	1st			-0.860736		Believes clinic trans or unsure	during Ebola	10	2.4	0	0	0	0	0	1	0
26	2	27	Not born at facility	Bassa	Yes	5.2	4.20117	0.390625	0.75	26	born in village	not during Ebola	not during Ebola	not during Ebola	not during Ebola	Dry season birth	none	2nd-3rd			-0.0786077		Believes clinic trans or unsure	during Ebola	5.2	0	0	0	0	0	0	1	0
1321	2	21	Born at facility	Bassa	Yes	6.2	4.20117	0.390625	0.326316	17	born in village	not during Ebola	not during Ebola	not during Ebola	not during Ebola	Rainy season birth	Some primary	2nd-3rd			0.0958707		not believe clinic trans	during Ebola	6.2	0	0	0	0	0	0	1	0
1175	1	12	Born at facility	English	Yes	19.1	6.24518	0.316456	0.207237	20	NOT born in village	not during Ebola	not during Ebola	not during Ebola	not during Ebola	Dry season birth	Some primary	2nd-3rd			0.0852576		not believe clinic trans	during Ebola	10	9.1	0	0	0	0	0	1	0
737	1	49	Not born at facility	Bassa	Yes	14.5	6.24518	0.316456	0.714286	22	born in village	not during Ebola	not during Ebola	not during Ebola	not during Ebola	Dry season birth	none	1st	2	2	-0.860736	2011	Believes clinic trans or unsure	not during Ebola	10	4.5	0	1	1	0	0	1	1
1016	2	31	Born at facility	Bassa	Yes	8.2	4.20117	0.390625	0.525	21	born in village	not during Ebola	not during Ebola	not during Ebola	not during Ebola	Dry season birth	none	1st	1	1	-0.73	2013	Believes clinic trans or unsure	not during Ebola	8.2	0	0	1	1	1	1	1	1
1228	3	42	Not born at facility	Bassa	Yes	4.2	13.7235	0.151899	0.55	24	born in village	not during Ebola	not during Ebola	not during Ebola	not during Ebola	Rainy season birth	Some Secondary or more	1st			1.38748		Believes clinic trans or unsure	during Ebola	4.2	0	0	0	0	0	0	1	0
972	1	51	Not born at facility	Bassa	No	16.3	6.24518	0.316456	0.365385	28	born in village	not during Ebola	not during Ebola	not during Ebola	not during Ebola	Dry season birth	none	1st			-0.473918		Believes clinic trans or unsure	during Ebola	10	6.3	0	0	0	0	0	1	0
830	1	65	Born at facility	Bassa	Yes	5.2	6.24518	0.316456	0.782609	19	NOT born in village	not during Ebola	not during Ebola	not during Ebola	not during Ebola	Dry season birth	Some primary	2nd-3rd			-0.860736		Believes clinic trans or unsure	during Ebola	5.2	0	0	0	0	0	0	1	0
76	3	52	Born at facility	English	Yes	0.1	13.7235	0.151899	0.0771605	20	born in village	not during Ebola	not during Ebola	not during Ebola	not during Ebola	Rainy season birth	Some Secondary or more	1st	1	1	1.60476	2013		not during Ebola	0.1	0	0	1	1	1	1	1	1
407	1	69	Born at facility	English	Yes	15.6	6.24518	0.316456	0.590909	29	born in village	not during Ebola	not during Ebola	not during Ebola	not during Ebola	Dry season birth	Some primary	2nd-3rd			-0.860736		not believe clinic trans	during Ebola	10	5.6	0	0	0	0	0	1	0
300	3	52	Born at facility	Bassa	No	0.1	13.7235	0.151899	0.0771605	22	born in village	not during Ebola	not during Ebola	not during Ebola	not during Ebola	Rainy season birth	none	2nd-3rd			1.28781		Believes clinic trans or unsure	during Ebola	0.1	0	0	0	0	0	0	1	0
110	2	59	Not born at facility	Bassa	Yes	5.5	4.20117	0.390625	0.65625	19	born in village	not during Ebola	not during Ebola	not during Ebola	not during Ebola	Dry season birth	Some primary	1st			0.822505		not believe clinic trans	during Ebola	5.5	0	0	0	0	0	0	1	0
179	2	29	Not born at facility	Bassa	Yes	19.6	4.20117	0.390625	0.62069	15	born in village	not during Ebola	not during Ebola	not during Ebola	not during Ebola	Rainy season birth	Some primary	2nd-3rd			-0.752947		Believes clinic trans or unsure	during Ebola	10	9.6	0	0	0	0	0	1	0
856	2	24	Born at facility	Bassa	Yes	6.7	4.20117	0.390625	0.59375	21	born in village	not during Ebola	not during Ebola	not during Ebola	not during Ebola	Rainy season birth	Some primary	4th or higher	1	1	-0.363669	2013	not believe clinic trans	not during Ebola	6.7	0	0	1	1	1	1	1	1
[truncated: 1,212 more rows]
