# Supplementary material for: Facility-Based Delivery during the Ebola Virus Disease Epidemic in Rural Liberia: Analysis from a Cross-Sectional, Population-Based Household Survey
Source: PLoS Med. 2016 Aug 2;13(8):e1002096. doi: 10.1371/journal.pmed.1002096 (PMC4970816; doi:10.1371/journal.pmed.1002096)
Supplement: S13 Table — (DOC) [file pmed.1002096.s021.doc]

| **Supplemental Table 13.** Sensitivity Analysis: Ebola period begins on August 6, when Liberia’s president declared a national emergency. N=898 | | | | | | | | |
| --- | --- | --- | --- | --- | --- | --- | --- | --- |
|  | **Unadjusted Model** | | **Multivariable Model 1** | | **Multivariable Model 2** | | **Multivariable Model 3** | |
|  | OR (95% CI) | p | AOR (95% CI) | p | AOR (95% CI) | p | AOR (95% CI) | p |
|  |  |  |  |  |  |  |  |  |
| Ebola period | 0.74 (0.53-1.03) | 0.072 | 0.79 (0.56-1.12) | 0.186 | 0.75 (0.52-1.07) | 0.114 | 0.72 (0.50-1.04) | 0.079 |
| Household wealth |  |  | 1.68 (1.29-2.19) | <0.001 | 1.25 (0.98-1.58) | 0.067 | 1.26 (0.99-1.59) | 0.061 |
| Maternal education |  |  |  |  |  |  |  |  |
| None |  |  | Ref. | Ref. | Ref. | Ref. | Ref. | Ref. |
| Primary only |  |  | 1.17 (0.80-1.72) | 0.414 | 1.08 (0.75-1.55) | 0.670 | 1.05 (0.71-1.53) | 0.816 |
| Secondary or higher |  |  | 1.44 (0.80-2.59) | 0.217 | 1.53 (0.84-2.81) | 0.163 | 1.53 (0.80-2.92) | 0.196 |
| Bassa language speaker |  |  |  |  | 0.77 (0.50-1.18) | 0.225 | 0.76 (0.49-1.18) | 0.217 |
| Distance from health facility |  |  |  |  |  |  |  |  |
| Per km, up to 10km |  |  |  |  | 0.84 (0.78-0.92) | <0.001 | 0.84 (0.78-0.92) | <0.001 |
| Per km, 10 to 21km |  |  |  |  | 1.00 (0.93-1.08) | 0.965 | 1.00 (0.93-1.08) | 0.938 |
| Per km, 21km and over |  |  |  |  | 0.91 (0.83-1.01) | 0.065 | 0.91 (0.83-1.01) | 0.083 |
| Maternal age at birth |  |  |  |  |  |  |  |  |
| First quartile |  |  |  |  |  |  | Ref. | Ref. |
| Second quartile |  |  |  |  |  |  | 0.73 (0.46-1.17) | 0.189 |
| Third quartile |  |  |  |  |  |  | 0.71 (0.47-1.06) | 0.093 |
| Fourth quartile |  |  |  |  |  |  | 0.75 (0.47-1.17) | 0.201 |
| Mother is married |  |  |  |  |  |  | 1.03 (0.63-1.70) | 0.891 |
| Birth order |  |  |  |  |  |  |  |  |
| 1st |  |  |  |  |  |  | Ref. | Ref. |
| 2nd or 3rd |  |  |  |  |  |  | 0.88 (0.61-1.27) | 0.499 |
| 4th or higher |  |  |  |  |  |  | 1.16 (0.78-1.72) | 0.451 |
| Rainy season birth |  |  |  |  |  |  | 0.84 (0.61-1.16) | 0.276 |
|  | | | | | | | | |
